# Supplementary material for: Silver catalyzed decarboxylative acylation of pyridine-N-oxides using α-oxocarboxylic acids
Source: Royal Society of Chemistry journal article supplement (doi:10.1039/c4ra05777e), 2014-01-01
Supplement: c4ra05777e1.pdf [file c4ra05777e1.pdf]

## Silver catalyzed decarboxylative acylation of pyridine *N*-oxides using $\alpha$ -oxocarboxylic acids

Rajendran Suresh,<sup>a,b</sup> Rajendran Senthil Kumaran,<sup>b</sup> Vajiram Senthilkumar<sup>b</sup> and Shanmugam Muthusubramanian,<sup>\*a</sup>

<sup>a</sup>*Department of Organic Chemistry, School of Chemistry, Madurai Kamaraj University, Madurai - 625 021, India.*

<sup>b</sup>*Syngene International Limited, Biocon, Bangalore – 560 099, India.*

[muthumanian2001@yahoo.com](mailto:muthumanian2001@yahoo.com)

| Table of Contents:                                                              | page |
|---------------------------------------------------------------------------------|------|
| Experimental procedures and analytical data                                     | 3    |
| Screening table                                                                 | 6    |
| <sup>1</sup> H NMR, <sup>13</sup> C NMR and mass spectra of compound 3a         | 7    |
| <sup>1</sup> H NMR, <sup>13</sup> C NMR and mass spectra of compound 3b         | 10   |
| <sup>1</sup> H NMR, <sup>13</sup> C NMR and mass spectra of compound 3c         | 13   |
| <sup>1</sup> H NMR and mass spectra of compound 3d                              | 16   |
| <sup>1</sup> H NMR, <sup>13</sup> C NMR and mass spectra of compound 3e         | 18   |
| <sup>1</sup> H NMR, <sup>13</sup> C NMR and mass spectra of compound 3f         | 21   |
| <sup>1</sup> H NMR, <sup>13</sup> C NMR and mass spectra of compound 3g         | 24   |
| <sup>1</sup> H NMR, <sup>13</sup> C NMR and mass spectra of compound 3h         | 27   |
| <sup>1</sup> H NMR, <sup>13</sup> C NMR and mass spectra of compound 3i         | 30   |
| <sup>1</sup> H NMR, <sup>13</sup> C NMR and mass spectra of compound 3j         | 33   |
| <sup>1</sup> H NMR, <sup>13</sup> C NMR and mass spectra of compound 3k         | 36   |
| <sup>1</sup> H NMR, <sup>13</sup> C NMR and mass spectra of compound 3l         | 39   |
| <sup>1</sup> H NMR, <sup>13</sup> C NMR and mass spectra of compound 3m         | 42   |
| <sup>1</sup> H NMR, <sup>13</sup> C NMR and mass spectra of compound 3n         | 45   |
| <sup>1</sup> H-NMR, <sup>13</sup> C-NMR and mass spectra of compound 3o         | 48   |
| <sup>1</sup> H NMR, <sup>13</sup> C NMR and mass spectra of compound 3p         | 51   |
| <sup>1</sup> H NMR, <sup>13</sup> C NMR and mass spectra of compound 3p'        | 54   |
| <sup>1</sup> H NMR, <sup>13</sup> C NMR and mass spectra of compound 3q and 3q' | 57   |
| <sup>1</sup> H NMR, <sup>13</sup> C NMR spectra of compound 3r                  | 60   |
| <sup>1</sup> H NMR, <sup>13</sup> C NMR and mass spectra of compound 3r'        | 62   |
| <sup>1</sup> H NMR, <sup>13</sup> C NMR and mass spectra of compound 3s         | 65   |

|                                                                               |           |
|-------------------------------------------------------------------------------|-----------|
| <b><sup>1</sup>H NMR, <sup>13</sup>C NMR spectra of compound 3t</b>           | <b>68</b> |
| <b><sup>1</sup>H NMR, <sup>13</sup>C NMR and mass spectra of compound 3t'</b> | <b>70</b> |
| <b><sup>1</sup>H NMR and mass spectra of compound 4</b>                       | <b>73</b> |

---

**General procedure for the synthesis of (substituted benzoyl)pyridine 1-oxide (3).** The mixture of  $\alpha$ -keto carboxylic acid **2** (0.92 mmol), substituted pyridine N-oxide **1** (0.46 mmol), silvercarbonate (10 mol %) and  $K_2S_2O_8$  (1.38 mmol) in DCM:  $H_2O$  (3:1, 2 mL) were stirred at 50 °C for 12 h. The reaction mixture was filtered through celite pad, washed with dichloromethane. The organic layer was washed with water and brine, dried over sodium sulfate, and concentrated in vacuum. Crude product was purified by flash column chromatography using 70-80 % ethylacetate in hexane mixture as the solvent to get derivative **3**.

1. **2-(4-Chlorobenzoyl)-4-methylpyridine 1-oxide (3a).** Isolated as pale yellow solid; mp 174-175 °C;  $^1H$  NMR (400 MHz,  $CDCl_3$ ):  $\delta$  2.43 (s, 3H), 7.23-7.25 (m, 2H), 7.45 (d,  $J$  = 8.4 Hz, 2H), 7.78 (d,  $J$  = 8.4 Hz, 2H), 8.13 (d,  $J$  = 6.8 Hz, 1H);  $^{13}C$  NMR (100 MHz,  $CDCl_3$ )  $\delta$  20.4, 126.3, 128.0, 129.2, 130.6, 133.5, 137.8, 139.3, 140.6, 146.0, 188.3; UPLC (M+1) 248; Anal. Calcd for:  $C_{13}H_{10}ClNO_2$ : C, 63.04; H, 4.07; N, 5.66 %. Found C, 63.10; H, 4.03; N, 5.70 %.
2. **4-Chloro-2-(4-chlorobenzoyl)pyridine 1-oxide (3b).** Isolated as offwhite solid; mp 191-192 °C;  $^1H$  NMR (400 MHz,  $CDCl_3$ ):  $\delta$  7.39 - 7.41 (m, 2H), 7.46 (d,  $J$  = 8.4 Hz, 2H), 7.76 (d,  $J$  = 8.4 Hz, 2H), 8.15 (d,  $J$  = 6.8 Hz, 1H);  $^{13}C$  NMR (100 MHz,  $CDCl_3$ )  $\delta$  125.9, 127.5, 129.3, 129.5, 130.6, 132.0, 133.0, 140.7, 141.0, 186.7; UPLC (M+1) 269; Anal. Calcd for:  $C_{12}H_7Cl_2NO_2$ : C, 53.76; H, 2.63; N, 5.22 %. Found C, 53.70; H, 2.67; N, 5.17 %.
3. **2-(4-Chlorobenzoyl)-4-methoxypyridine 1-oxide (3c).** Isolated as offwhite solid; mp 124-125 °C;  $^1H$  NMR (400 MHz,  $CDCl_3$ ):  $\delta$  3.91 (s, 3H), 6.93-6.97 (m, 2H), 7.45 (d,  $J$  = 8.0 Hz, 2H), 7.80 (d,  $J$  = 8.0 Hz, 2H), 8.14 (d,  $J$  = 4.8 Hz, 1H);  $^{13}C$  NMR (100 MHz,  $CDCl_3$ )  $\delta$  56.4, 110.4, 113.7, 129.2, 130.7, 133.3, 140.7,\* 140.9, 156.0, 187.7.; UPLC (M+1) 264; Anal. Calcd for:  $C_{13}H_{10}ClNO_3$ : C, 59.22; H, 3.82; N, 5.31 %. Found C, 59.26; H, 3.85; N, 5.27 %.) \* Two carbons merged here.
4. **4-Methyl-2-(4-(trifluoromethyl)benzoyl)pyridine 1-oxide (3d).** Isolated as offwhite solid; mp 156-157 °C;  $^1H$  NMR (400 MHz,  $CDCl_3$ ):  $\delta$  7.29-7.31 (m, 2H), 7.74 (d,  $J$  = 8.0 Hz, 2H), 7.94 (d,  $J$  = 8.0 Hz, 2H), 8.15 (d,  $J$  = 5.6 Hz, 1H); The solubility in NMR solvents is so poor and an intense  $^{13}C$  NMR spectrum could not be recorded; UPLC (M+1) 282; Anal. Calcd for:  $C_{14}H_{10}F_3NO_2$ : C, 59.79; H, 3.58; N, 4.98 %. Found C, 59.71; H, 3.64; N, 5.03 %.
5. **4-Chloro-2-(4-(trifluoromethyl)benzoyl)pyridine 1-oxide (3e).** Isolated as pale yellow solid; mp 134-135 °C;  $^1H$  NMR (400 MHz,  $CDCl_3$ ):  $\delta$  7.43-7.47 (m, 2H), 7.45 (d,  $J$  = 8.0 Hz, 2H), 7.93 (d,  $J$  = 8.0 Hz, 2H), 8.16 (d,  $J$  = 6.4 Hz, 1H);  $^{13}C$  NMR (100 MHz,  $CDCl_3$ )  $\delta$  29.7, 123.3, 125.9, 126.0, 127.8, 129.3, 132.2, 135.2, 137.4, 140.8, 187.2; UPLC (M+1) 302; Anal. Calcd for:  $C_{13}H_7ClF_3NO_2$ : C, 51.76; H, 2.34; N, 4.64 %. Found C, 51.82; H, 2.38; N, 4.60 %.
6. **4-Chloro-2-(3-methoxybenzoyl)pyridine 1-oxide (3f).** Isolated as pale brown solid; mp 145-147 °C;  $^1H$  NMR (400 MHz,  $CDCl_3$ ):  $\delta$  3.86 (s, 3H), 7.15-7.45 (m, 6H), 8.16 (t,  $J$  = 5.2 Hz, 1H);  $^{13}C$  NMR (100 MHz,  $CDCl_3$ )  $\delta$  55.4, 112.7, 121.2, 122.2, 125.5, 126.4, 127.0, 129.9, 131.8, 135.8, 140.7, 160.0, 187.6; UPLC (M+1) 264; Anal. Calcd for:  $C_{13}H_{10}ClNO_3$ : C, 59.22; H, 3.82; N, 5.31 %. Found C, 59.17; H, 3.88; N, 5.38 %.
7. **4-Chloro-2-(2-methylbenzoyl)pyridine 1-oxide (3g).** Isolated as offwhite solid; mp 169-171 °C;  $^1H$  NMR (400 MHz,  $CDCl_3$ ):  $\delta$  2.66 (s, 3H), 7.22-7.48 (m, 6H), 8.13 (d,  $J$  = 7.2 Hz, 1H);  $^{13}C$  NMR (100 MHz,  $CDCl_3$ )  $\delta$  21.4, 125.7, 126.0, 127.1, 130.6, 131.8,

- 132.4, 133.0, 134.2, 140.5, 140.8, 148.6, 189.5; UPLC (M+1) 248; Anal. Calcd for: C<sub>13</sub>H<sub>10</sub>ClNO<sub>2</sub>: C, 63.04; H, 4.07; N, 5.66 %. Found C, 63.07; H, 4.08; N, 5.71 %.
8. **4-Cyano-2-(2-methylbenzoyl)pyridine 1-oxide (3h)**. Isolated as offwhite solid; mp 194-196 °C; <sup>1</sup>H NMR (400 MHz, CDCl<sub>3</sub>): δ 2.65 (s, 3H), 7.25 (t, *J* = 8.0 Hz, 1H), 7.32-7.37 (m, 2H), 7.48 (t, *J* = 7.2 Hz, 1H), 7.60 (dd, *J* = 7.2, 2.8 Hz, 1H), 7.71 (d, *J* = 2.8 Hz, 1H), 8.20 (d, *J* = 7.2 Hz, 1H); <sup>13</sup>C NMR (100 MHz, CDCl<sub>3</sub>) δ 21.3, 107.8, 115.4, 126.0, 128.7, 129.2, 130.4, 132.5, 133.4, 133.8, 140.6, 141.1, 148.9, 188.8; UPLC (M+1) 239; Anal. Calcd for: C<sub>14</sub>H<sub>10</sub>N<sub>2</sub>O<sub>2</sub>: C, 70.58; H, 4.23; N, 11.76 %. Found C, 70.51; H, 4.28; N, 11.71 %.
9. **4-Chloro-2-propionylpyridine 1-oxide (3i)**. Isolated as pale yellow solid; mp 84-86 °C; <sup>1</sup>H NMR (400 MHz, CDCl<sub>3</sub>): δ 1.21 (t, *J* = 7.2 Hz, 3H), 3.23 (q, *J* = 7.2 Hz, 2H), 7.32-7.34 (m, 1H), 7.66 (s, 1H), 8.12 (d, *J* = 6.8 Hz, 1H); <sup>13</sup>C NMR (100 MHz, CDCl<sub>3</sub>) δ 7.9, 36.4, 126.8, 127.9, 131.8, 141.5, 147.0, 197.2; UPLC (M+1) 186; Anal. Calcd for: C<sub>8</sub>H<sub>8</sub>ClNO<sub>2</sub>: C, 51.77; H, 4.34; N, 7.55 %. Found C, 51.73; H, 4.30; N, 7.60 %.
10. **2-Benzoyl-4-methylpyridine 1-oxide (3j)**. Isolated as offwhite solid; mp 144-146 °C; <sup>1</sup>H NMR (400 MHz, CDCl<sub>3</sub>): δ 2.43 (s, 3H), 7.22-7.23 (m, 2H), 7.48 (t, *J* = 7.8 Hz, 2H), 7.62 (t, *J* = 7.2 Hz, 1H), 7.85 (d, *J* = 7.8 Hz, 2H), 8.15 (d, *J* = 7.8 Hz, 1H); <sup>13</sup>C NMR (100 MHz, CDCl<sub>3</sub>) δ 20.4, 126.0, 127.7, 128.8, 129.3, 134.2, 135.0, 137.8, 139.3, 146.4, 189.4; UPLC (M+1) 214; Anal. Calcd for: C<sub>13</sub>H<sub>11</sub>NO<sub>2</sub>: C, 73.23; H, 5.20; N, 6.57 %. Found C, 73.29; H, 5.24; N, 6.62 %.
11. **2-Benzoyl-4-chloropyridine 1-oxide (3k)**. Isolated as offwhite solid; mp 120-122 °C; <sup>1</sup>H NMR (400 MHz, CDCl<sub>3</sub>): δ 7.37-7.39 (m, 2H), 7.49 (t, *J* = 7.6 Hz, 1H), 7.63 (t, *J* = 7.6 Hz, 2H), 7.84 (d, *J* = 7.6 Hz, 2H), 8.16 (d, *J* = 6.4 Hz, 1H); <sup>13</sup>C NMR (100 MHz, CDCl<sub>3</sub>) δ 125.7, 127.1, 128.9, \* 129.2, 131.8, 134.4, 134.5, 140.7, 187.8; UPLC (M+1) 234; Anal. Calcd for: C<sub>12</sub>H<sub>8</sub>ClNO<sub>2</sub>: C, 61.69; H, 3.45; N, 5.99 %. Found C, 61.65; H, 3.48; N, 6.05 %. \* Two carbons merged here.
12. **2-Benzoyl-4-methoxypyridine 1-oxide (3l)**. Isolated as offwhite solid; mp 94-95 °C; <sup>1</sup>H NMR (400 MHz, CDCl<sub>3</sub>): δ 2.99 (s, 3H), 6.91 – 6.96 (m, 2H), 7.48 (t, *J* = 7.6 Hz, 2H), 7.61 (t, *J* = 7.2 Hz, 1H), 7.86 (d, *J* = 7.6 Hz, 2H), 8.14 (d, *J* = 7.2 Hz, 1H); <sup>13</sup>C NMR (100 MHz, CDCl<sub>3</sub>) δ 56.3, 110.1, 113.4, 128.8, 129.3, 134.2, 134.8, 138.2, 140.7, 157.7, 188.7; UPLC (M+1) 230; Anal. Calcd for: C<sub>13</sub>H<sub>11</sub>NO<sub>3</sub>: C, 68.11; H, 4.84; N, 6.11 %. Found C, 68.15; H, 4.79; N, 6.17 %.
13. **2-Benzoyl-4-cyanopyridine 1-oxide (3m)**. Isolated as pale yellow solid; mp 170-171 °C; <sup>1</sup>H NMR (400 MHz, CDCl<sub>3</sub>): δ 7.51 (t, *J* = 7.2 Hz, 2H), 7.63-7.68 (m, 3H), 7.80 (d, *J* = 7.2 Hz, 2H), 8.27 (d, *J* = 6.8 Hz, 1H); <sup>13</sup>C NMR (100 MHz, CDCl<sub>3</sub>) δ 107.9, 115.3, 128.6, 129.1, 129.2, 129.3, 134.3, 134.8, 141.0, 148.1, 187.3; UPLC (M+1) 225; Anal. Calcd for: C<sub>13</sub>H<sub>8</sub>N<sub>2</sub>O<sub>2</sub>: C, 69.64; H, 3.60; N, 12.49 %. Found C, 69.73; H, 3.67; N, 12.41 %.
14. **2-Benzoylquinoline 1-oxide (3n)**. Isolated as offwhite solid; mp 155-157 °C; <sup>1</sup>H NMR (400 MHz, CDCl<sub>3</sub>): δ 7.42-7.50 (m, 3H), 7.62 (t, *J* = 7.2 Hz, 1H), 7.74 (t, *J* = 7.2 Hz, 1H), 7.81-7.84 (m, 4H), 7.96 (d, *J* = 7.6 Hz, 1H), 8.73 (d, *J* = 8.8 Hz, 1H); <sup>13</sup>C NMR (100 MHz, CDCl<sub>3</sub>) δ 119.8, 120.4, 125.8, 128.3, 128.9, 129.2, 129.6, 130.7, 131.0, 134.1, 135.2, 141.6, 142.8, 190.3; UPLC (M+1) 250; Anal. Calcd for: C<sub>16</sub>H<sub>11</sub>NO<sub>2</sub>: C, 77.10; H, 4.45; N, 5.62 %. Found C, 77.06; H, 4.41; N, 5.68 %.
15. **2-(4-Chlorobenzoyl)quinoline 1-oxide (3o)**. Isolated as offwhite solid; mp 137-138 °C; <sup>1</sup>H NMR (400 MHz, CDCl<sub>3</sub>): δ 7.44-7.47 (m, 3H), 7.74-7.90 (m, 5H), 7.97 (d, *J* = 7.6 Hz,

- 1H), 8.72 (d,  $J = 8.8$  Hz, 1H);  $^{13}\text{C}$  NMR (100 MHz,  $\text{CDCl}_3$ )  $\delta$  119.8, 120.5, 126.0, 128.3, 129.3, 129.8, 130.5, 130.8, 131.2, 133.7, 140.5, 141.6, 142.3, 189.1; UPLC (M+1) 284; Anal. Calcd for:  $\text{C}_{16}\text{H}_{10}\text{ClNO}_2$ : C, 67.74; H, 3.55; N, 4.94 %. Found C, 67.69; H, 3.59; N, 4.90 %.
16. **2-Benzoyl-6-methylpyridine 1-oxide (3p)**. Isolated as offwhite solid; mp 111-113 °C;  $^1\text{H}$  NMR (400 MHz,  $\text{CDCl}_3$ ):  $\delta$  2.56 (s, 3H), 7.28-7.35 (m, 2H), 7.42 (dd,  $J = 7.0, 2.4$  Hz, 1H), 7.48 (t,  $J = 7.2$  Hz, 2H), 7.60 (t,  $J = 7.8$  Hz, 1H), 7.82 (d,  $J = 7.6$  Hz, 2H);  $^{13}\text{C}$  NMR (100 MHz,  $\text{CDCl}_3$ )  $\delta$  17.4, 122.9, 125.3, 127.3, 128.8, 129.1, 133.9, 135.4, 147.0, 149.9, 189.7; UPLC (M+1) 214; Anal. Calcd for:  $\text{C}_{13}\text{H}_{11}\text{NO}_2$ : C, 73.23; H, 5.20; N, 6.57 %. Found C, 73.26; H, 5.23; N, 6.60 %.
17. **4-Benzoyl-2-methylpyridine 1-oxide (3p')**. Isolated as offwhite solid; mp 120-121 °C;  $^1\text{H}$  NMR (400 MHz,  $\text{CDCl}_3$ ):  $\delta$  2.56 (s, 3H), 7.54 (t,  $J = 7.6$  Hz, 2H), 7.59 (d,  $J = 4.8$  Hz, 1H), 7.66 (t,  $J = 7.6$  Hz, 1H), 7.73 (s, 1H), 8.34 (d,  $J = 6.4$  Hz, 1H);  $^{13}\text{C}$  NMR (100 MHz,  $\text{CDCl}_3$ )  $\delta$  17.8, 124.3, 127.0, 128.7, 129.6, 132.6, 133.2, 136.3, 139.3, 149.3, 192.6; UPLC (M+1) 214; Anal. Calcd for:  $\text{C}_{13}\text{H}_{11}\text{NO}_2$ : C, 73.23; H, 5.20; N, 6.57 %. Found C, 73.19; H, 5.18; N, 6.51 %.
18. **2-Benzoyl-5-carboxypyridine 1-oxide (3r)**. Isolated as pale yellow solid; mp 148-149 °C;  $^1\text{H}$  NMR (400 MHz,  $\text{DMSO-d}_6$ ):  $\delta$  7.54 (t,  $J = 7.2$  Hz, 2H), 7.68 (t,  $J = 7.2$  Hz, 1H), 7.94 (d,  $J = 7.2$  Hz, 2H), 8.06 (d,  $J = 8.0$  Hz, 1H), 8.50 (dd,  $J = 8.0, 1.6$  Hz, 1H), 9.15 (d,  $J = 1.6$  Hz, 1H), 13.8 (br s, 1H);  $^{13}\text{C}$  NMR (100 MHz,  $\text{DMSO-d}_6$ )  $\delta$  124.5, 128.8, 129.0, 131.0, 133.8, 136.0, 138.9, 149.6, 157.8, 166.1, 193.4; UPLC (M+1) 244; Anal. Calcd for:  $\text{C}_{13}\text{H}_9\text{NO}_4$ : C, 64.20; H, 3.73; N, 5.76 %. Found C, 64.27; H, 3.67; N, 5.72 %.
19. **2,4-Dibenzoyl-5-carboxypyridine 1-oxide (3r')**. Isolated as pale brown solid; mp 189-190 °C;  $^1\text{H}$  NMR (400 MHz,  $\text{DMSO-d}_6$ ):  $\delta$  7.53-7.60 (m, 4H), 7.68-7.80 (m, 4H), 8.01 (s, 1H), 8.02 (d,  $J = 7.6$  Hz, 2H), 9.25 (s, 1H), 13.9 (br s, 1H);  $^{13}\text{C}$  NMR (100 MHz,  $\text{DMSO-d}_6$ )  $\delta$  122.0, 126.8, 128.8, 129.3, 129.6, 131.2, 134.1, 134.4, 135.7, 135.9, 150.2, 150.4, 157.9, 165.6, 192.9, 194.5; UPLC (M+1) 348; Anal. Calcd for:  $\text{C}_{20}\text{H}_{13}\text{NO}_5$ : C, 69.16; H, 3.77; N, 4.03 %. Found C, 69.20; H, 3.81; N, 3.98 %.
20. **4-Benzoyl-2,6-dimethylpyridine 1-oxide (3s)**. Isolated as offwhite solid; mp 215-216 °C;  $^1\text{H}$  NMR (400 MHz,  $\text{DMSO-d}_6$ ):  $\delta$  2.41 (s, 6H), 7.55-7.60 (m, 2H), 7.67-7.70 (m, 3H), 7.75-7.78 (m, 2H);  $^{13}\text{C}$  NMR (100 MHz,  $\text{CDCl}_3$ )  $\delta$  18.4, 124.4, 128.6, 129.6, 131.7, 133.0, 136.5, 149.2, 193.2; UPLC (M+1) 228; Anal. Calcd for:  $\text{C}_{14}\text{H}_{13}\text{NO}_2$ : C, 73.99; H, 5.77; N, 6.16 %. Found C, 74.03; H, 5.72; N, 6.22 %.
21. **2-Benzoylpyridine 1-oxide (3t)**. Isolated as pale brown viscous liquid;  $^1\text{H}$  NMR (400 MHz,  $\text{CDCl}_3$ ):  $\delta$  7.42-7.49 (m, 5H), 7.61 (t,  $J = 7.6$  Hz, 1H), 7.83 (d,  $J = 7.2$  Hz, 2H), 8.27 (bd, 1H);  $^{13}\text{C}$  NMR (100 MHz,  $\text{CDCl}_3$ )  $\delta$  125.6, 125.9, 126.9, 128.8, 128.9, 129.3, 134.2, 135.0, 140.1, 189.3; UPLC (M+1) 200; Anal. Calcd for:  $\text{C}_{12}\text{H}_9\text{NO}_2$ : C, 72.35; H, 4.55; N, 7.03 %. Found C, 72.31; H, 4.62; N, 7.00 %.
22. **6,6'-Dibenzoyl-3,3'-bipyridine 1,1'-dioxide (3t')**. Isolated as offwhite solid; mp 161-162 °C;  $^1\text{H}$  NMR (400 MHz,  $\text{DMSO-d}_6$ ):  $\delta$  7.58 (t,  $J = 7.6$  Hz, 4H), 7.73 (t,  $J = 7.6$  Hz, 2H), 7.80 (d,  $J = 7.6$  Hz, 4H), 7.88 (d,  $J = 8.0$  Hz, 2H), 8.02 (d,  $J = 8.0$  Hz, 2H), 8.92 (s, 2H);  $^{13}\text{C}$  NMR (100 MHz,  $\text{DMSO-d}_6$ )  $\delta$  125.2, 126.0, 129.4, 129.5, 134.8, 135.3, 138.5,\* 146.3, 189.8; UPLC (M+1) 397; Anal. Calcd for:  $\text{C}_{24}\text{H}_{16}\text{N}_2\text{O}_4$ : C, 72.72; H, 4.07; N, 7.07 %. Found C, 72.63; H, 4.02; N, 7.02 %. \* Two carbons merged here.

**Table** Screening impact on reagents and solvents

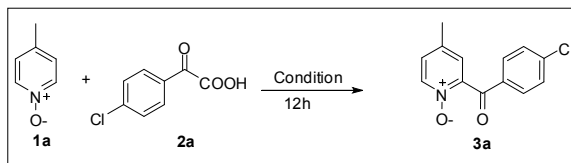

| Entry                 | Catalyst<br>(10 mol %)               | Oxidant<br>(2eq)                               | Solvent                   | Tem<br>p<br>°C | Yiel<br>d of<br><b>3a</b><br>(%) <sup>[a]</sup> |
|-----------------------|--------------------------------------|------------------------------------------------|---------------------------|----------------|-------------------------------------------------|
| 1                     | Cu(OAc) <sub>2</sub>                 | TBHP                                           | DMF                       | 100            | 28                                              |
| 2                     | Cu(OAc) <sub>2</sub>                 | Ag <sub>2</sub> O                              | DMF                       | 100            | 45                                              |
| 3                     | CuSO <sub>4</sub> ·5H <sub>2</sub> O | TBHP                                           | DMF                       | 100            | 28                                              |
| 4                     | CuSO <sub>4</sub> ·5H <sub>2</sub> O | K <sub>2</sub> S <sub>2</sub> O <sub>8</sub>   | DMF                       | 100            | 32                                              |
| 5                     | FeSO <sub>4</sub> ·7H <sub>2</sub> O | K <sub>2</sub> S <sub>2</sub> O <sub>8</sub>   | DCM/H <sub>2</sub> O      | 50             | 40                                              |
| 6                     | Pd(OAc) <sub>2</sub>                 | K <sub>2</sub> S <sub>2</sub> O <sub>8</sub>   | DMSO                      | 80             | 38                                              |
| 7                     | Mn(OAc) <sub>3</sub>                 | -                                              | HOAc                      | 80             | 25                                              |
| 8                     | -                                    | CAN                                            | CH <sub>3</sub> CN        | 80             | -                                               |
| 9                     | AgOAc                                | K <sub>2</sub> S <sub>2</sub> O <sub>8</sub>   | DCM/H <sub>2</sub> O      | 50             | 22                                              |
| 10                    | AgNO <sub>3</sub>                    | TBHP                                           | DCM/H <sub>2</sub> O      | 50             | 41                                              |
| 11                    | AgNO <sub>3</sub>                    | NH <sub>4</sub> S <sub>2</sub> O <sub>8</sub>  | DCM/H <sub>2</sub> O      | 50             | 53                                              |
| 12                    | AgNO <sub>3</sub>                    | K <sub>2</sub> S <sub>2</sub> O <sub>8</sub>   | DCM/H <sub>2</sub> O      | 50             | 59                                              |
| 13 <sup>b</sup>       | Ag <sub>2</sub> CO <sub>3</sub>      | K <sub>2</sub> S <sub>2</sub> O <sub>8</sub>   | DCM/H <sub>2</sub> O      | 50             | 65                                              |
| <b>14<sup>c</sup></b> | <b>Ag<sub>2</sub>CO<sub>3</sub></b>  | <b>K<sub>2</sub>S<sub>2</sub>O<sub>8</sub></b> | <b>DCM/H<sub>2</sub>O</b> | <b>50</b>      | <b>81</b>                                       |
| 15                    | Ag <sub>2</sub> CO <sub>3</sub>      | O <sub>2</sub>                                 | DCM/H <sub>2</sub> O      | 50             | 16                                              |
| 16                    | Ag <sub>2</sub> CO <sub>3</sub>      | Oxone                                          | DCM/H <sub>2</sub> O      | 50             | 11                                              |

<sup>a</sup>Isolated yield; <sup>b</sup>Reaction condition: heteroarene *N*-oxide (0.46 mmol), acid (0.69 mmol), catalyst (10 mol%), oxidant (0.92 mmol) in DCM:water mixture (2 mL, 3:1), 50 °C, 12 h; <sup>c</sup>Reaction condition: 0.92 mmol of acid and 1.38 mmol of oxidant used.

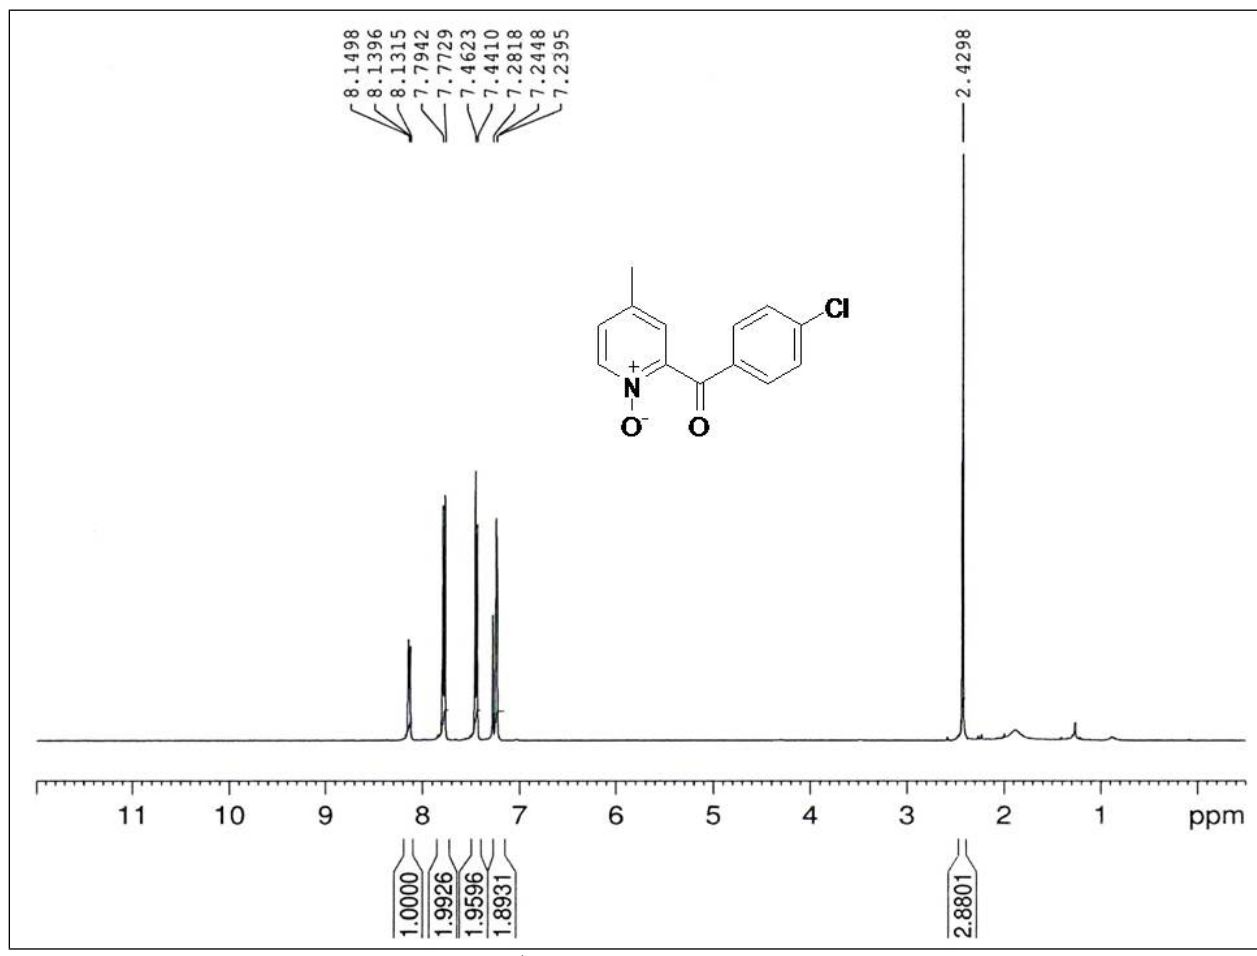

Fig 1. <sup>1</sup>H-NMR spectrum of **3a**

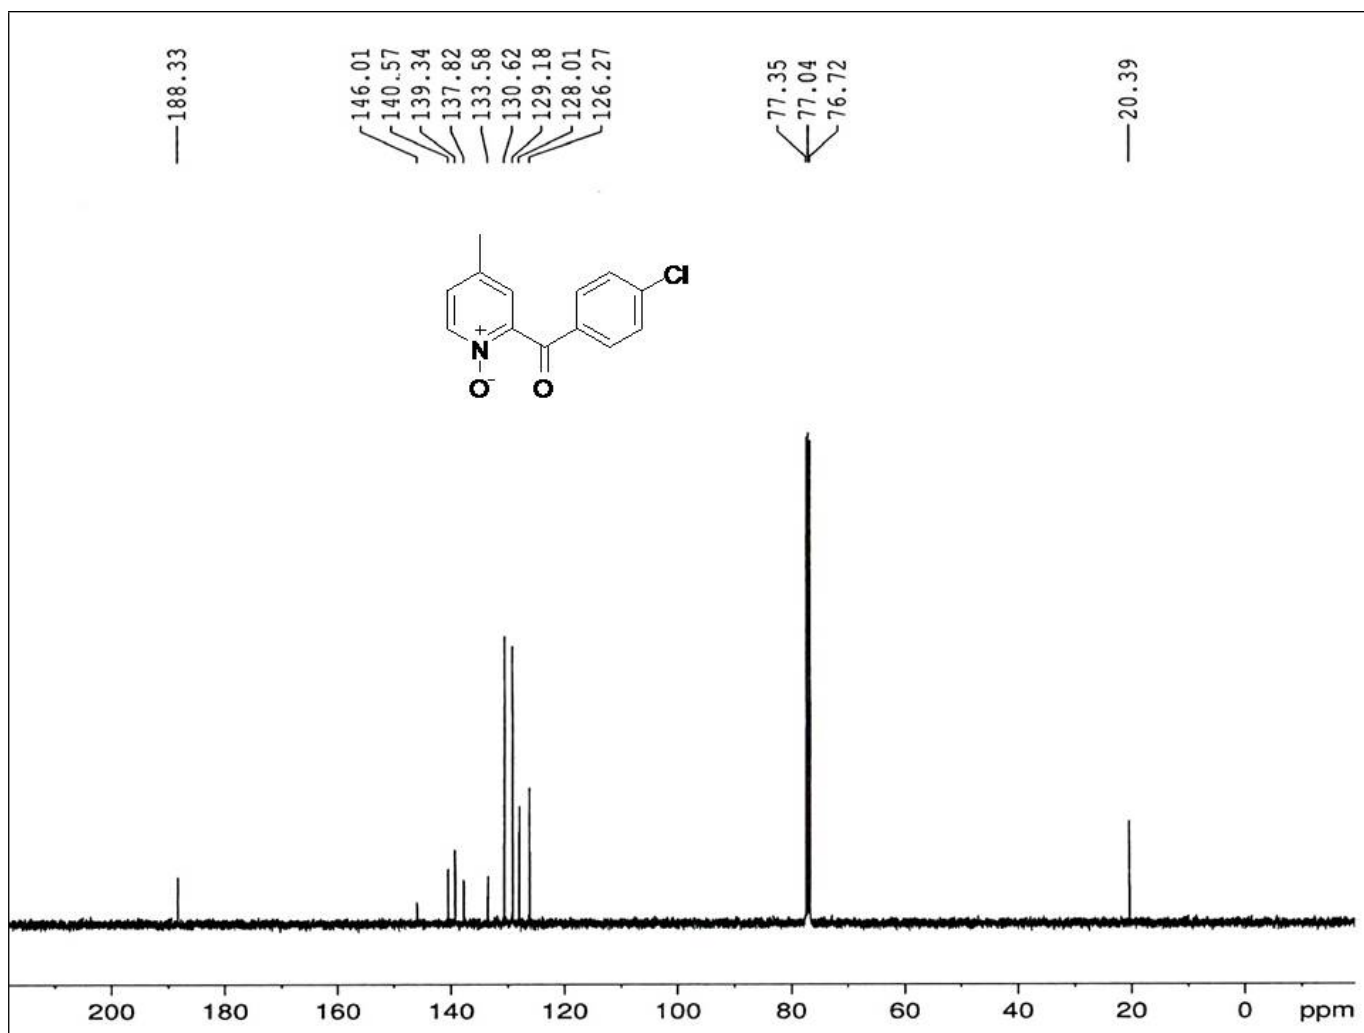

Fig 2.  $^{13}\text{C}$ -NMR spectrum of 3a



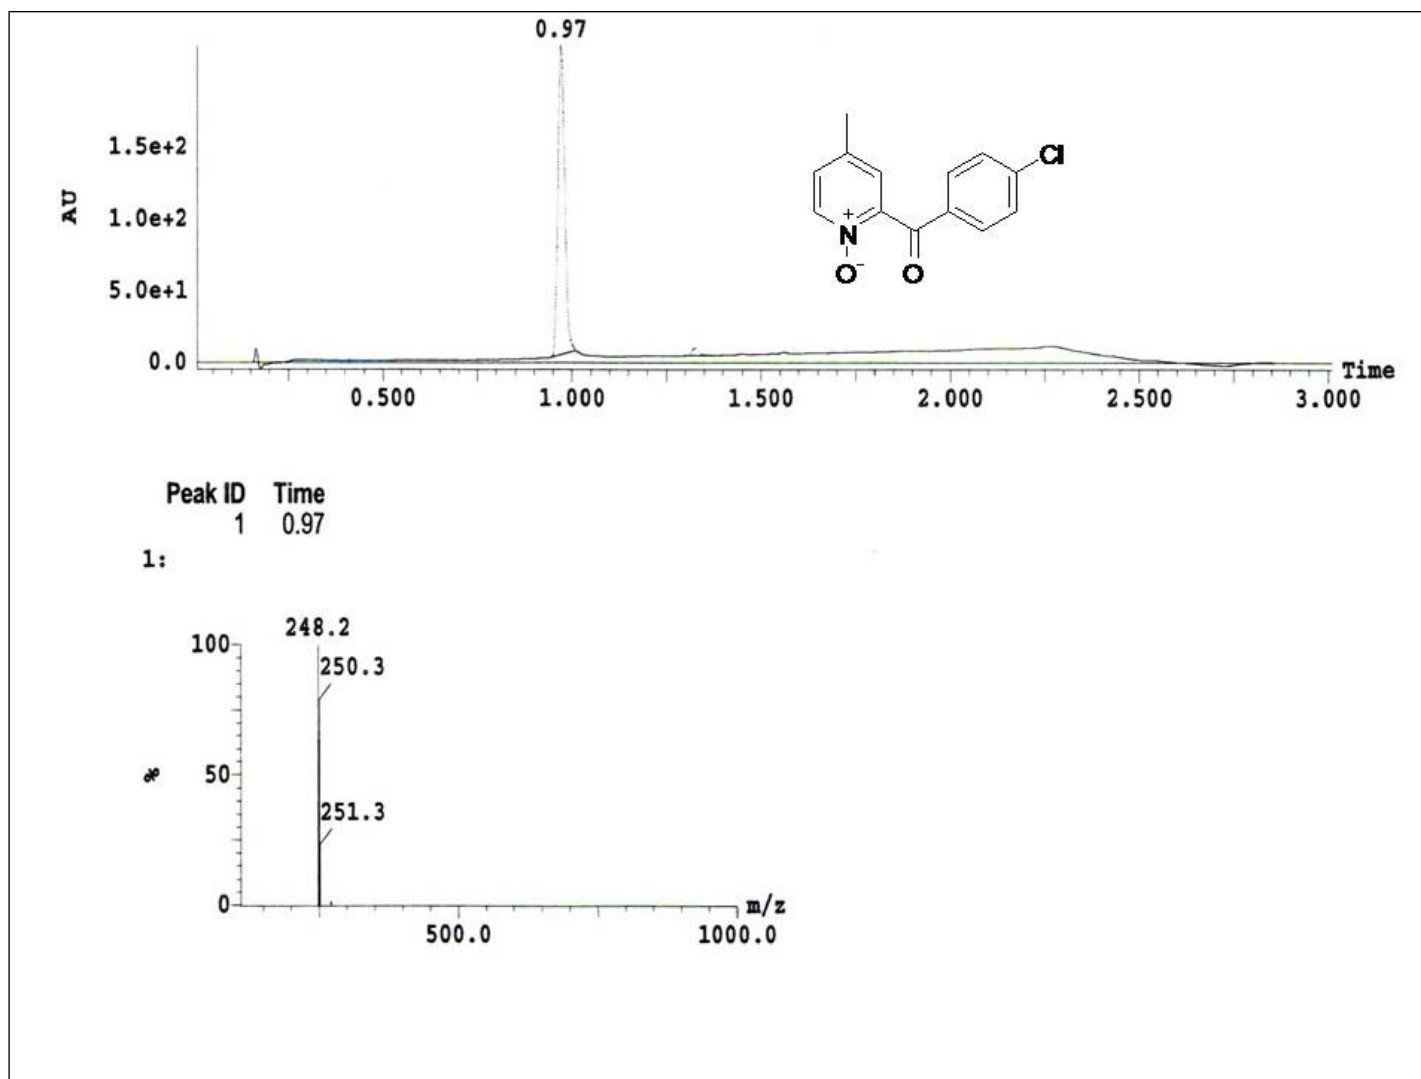

Fig 3. Mass spectrum of 3a

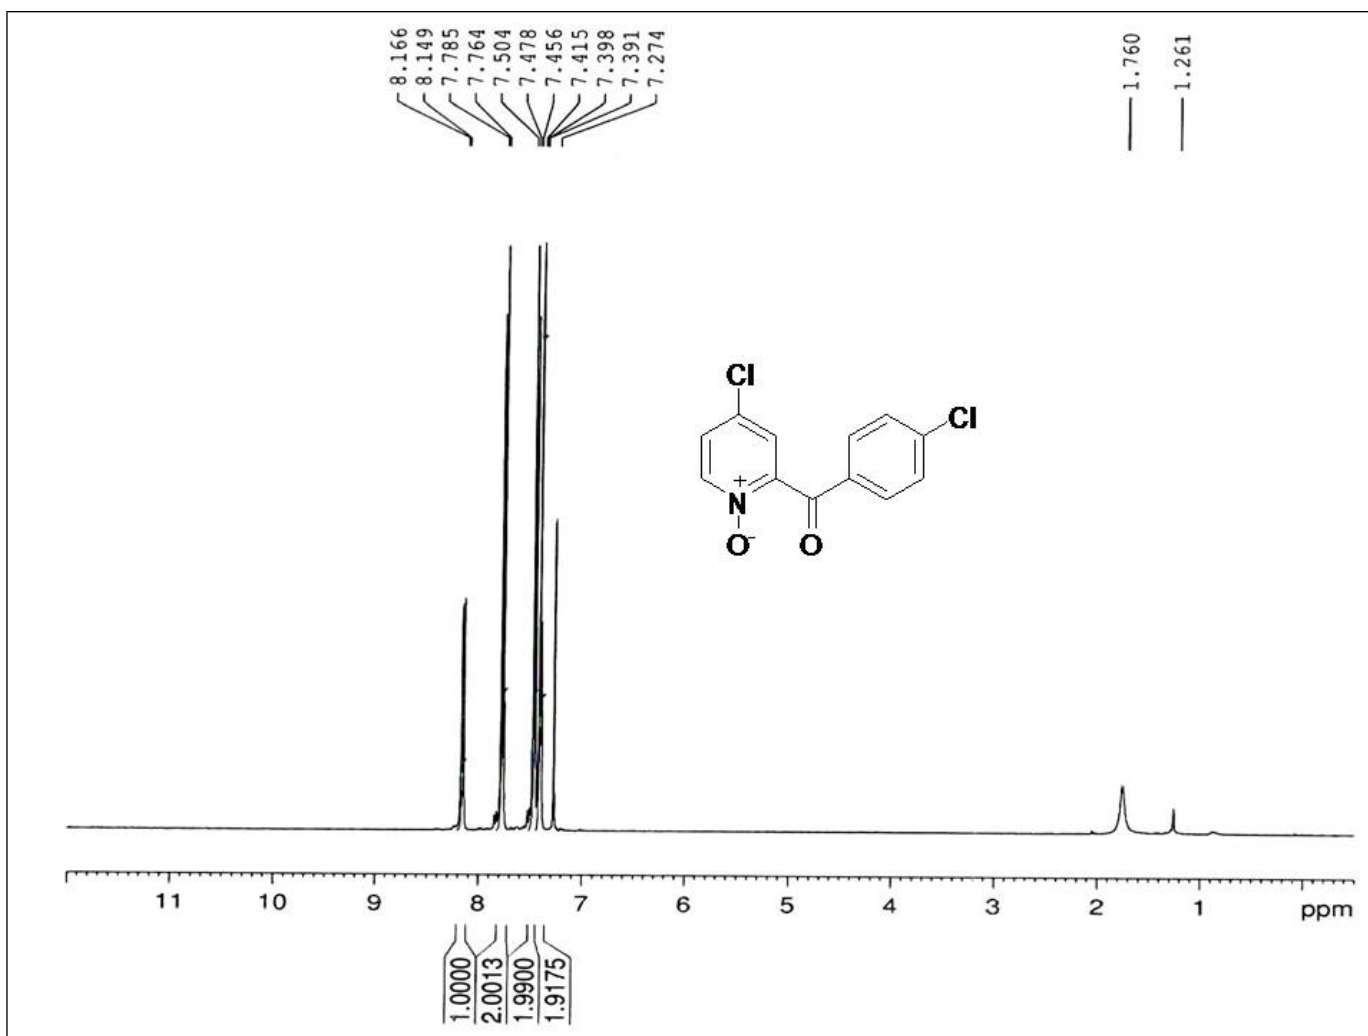

Fig 4. <sup>1</sup>H-NMR spectrum of **3b**

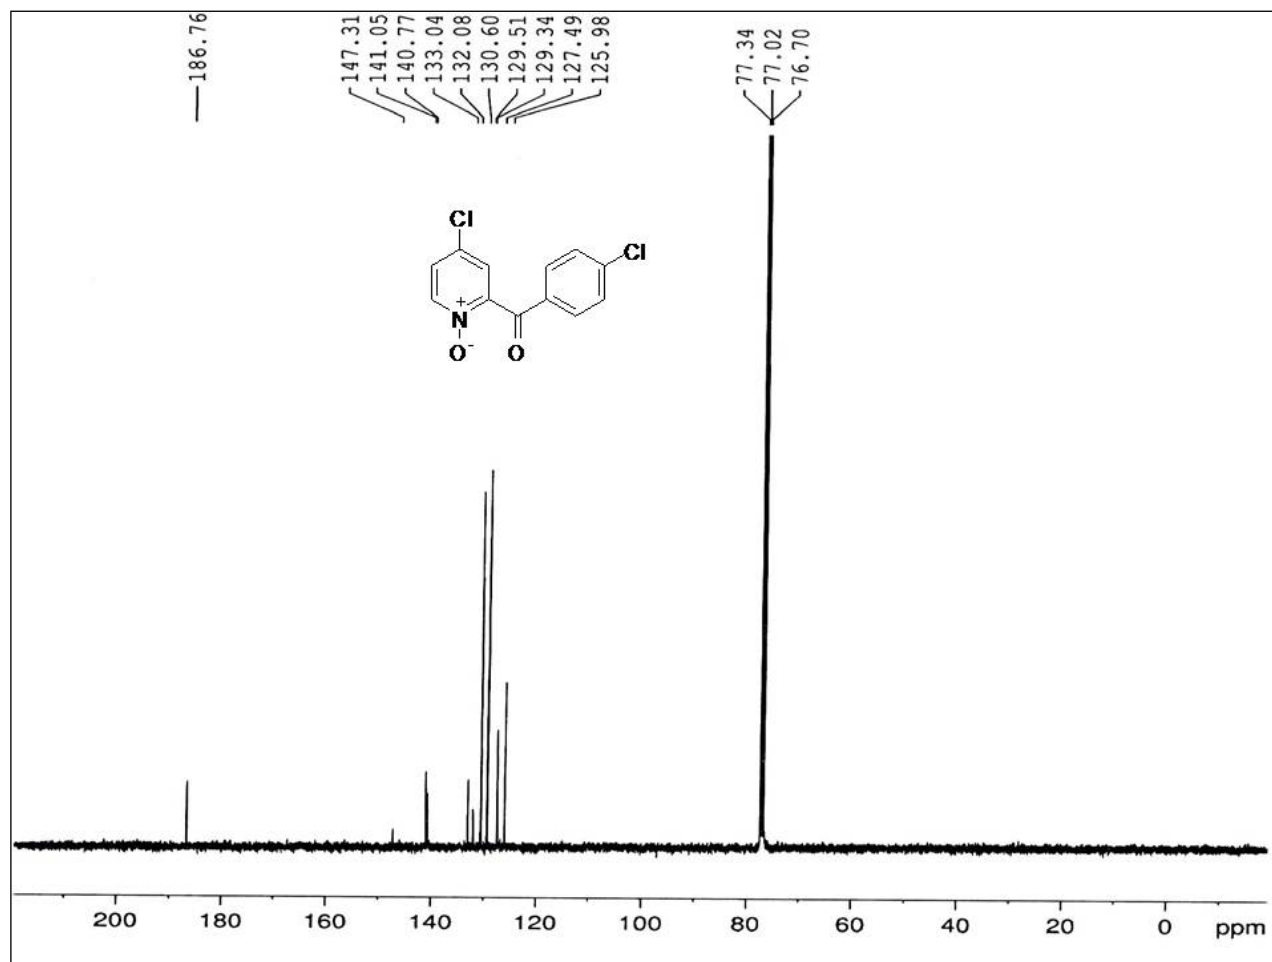

Fig 5.  $^{13}\text{C}$ -NMR spectrum of **3b**

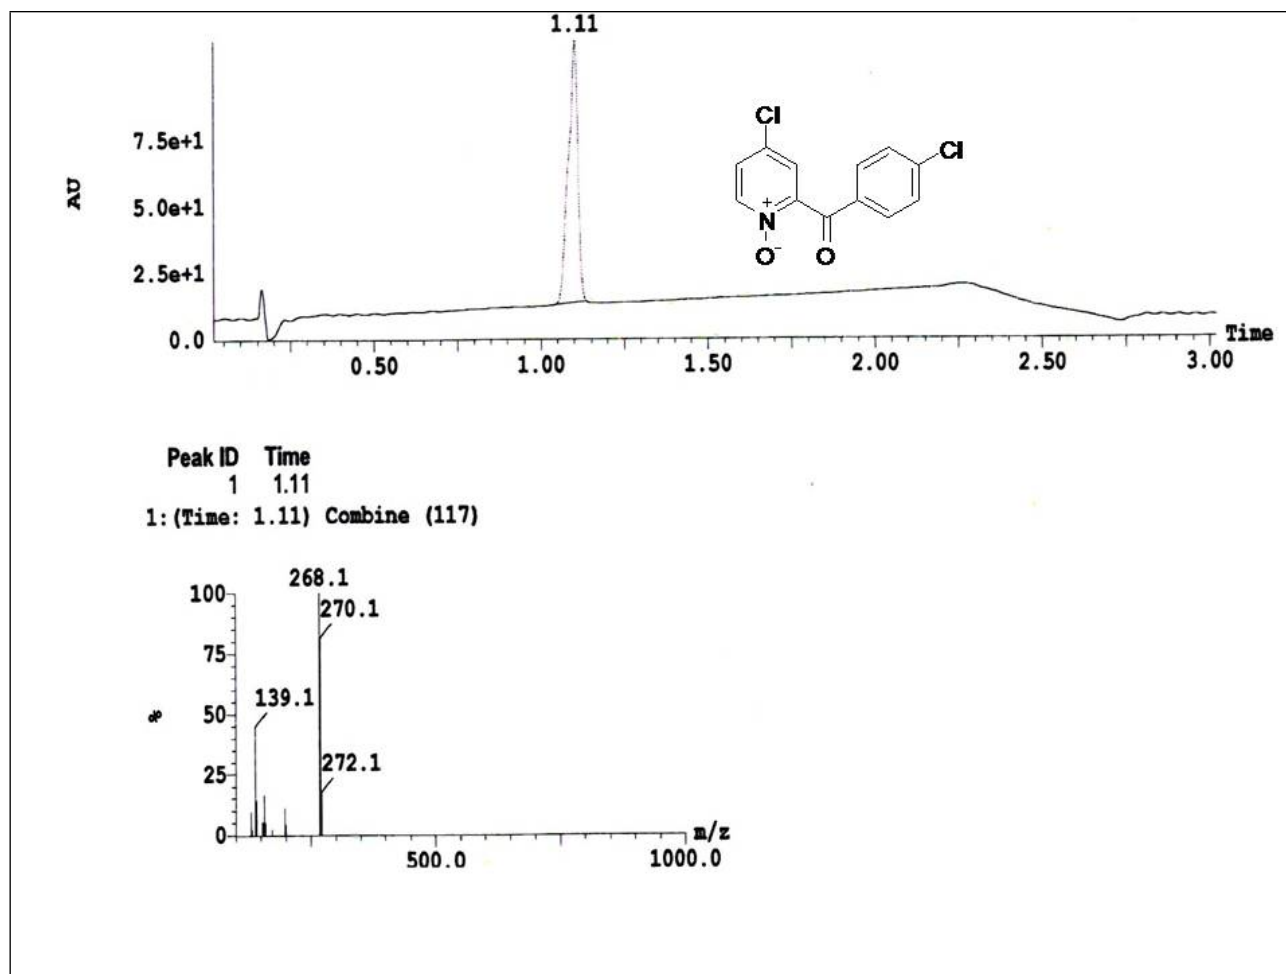

Fig 6. Mass spectrum of **3b**

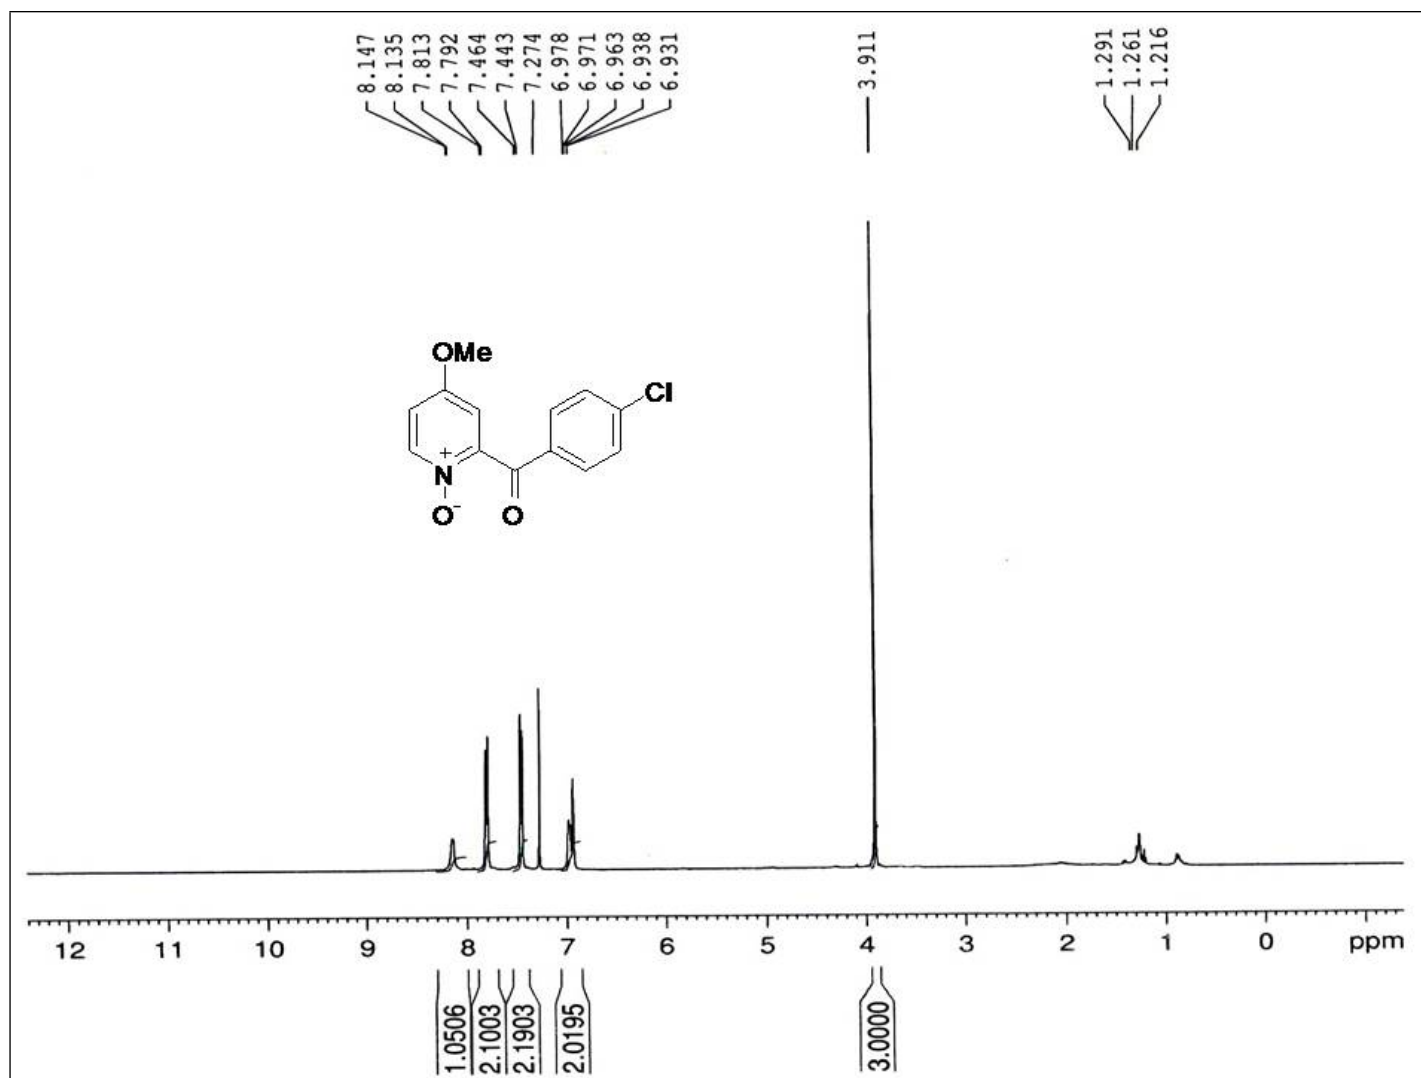

Fig 7.  $^1\text{H-NMR}$  spectrum of **3c**

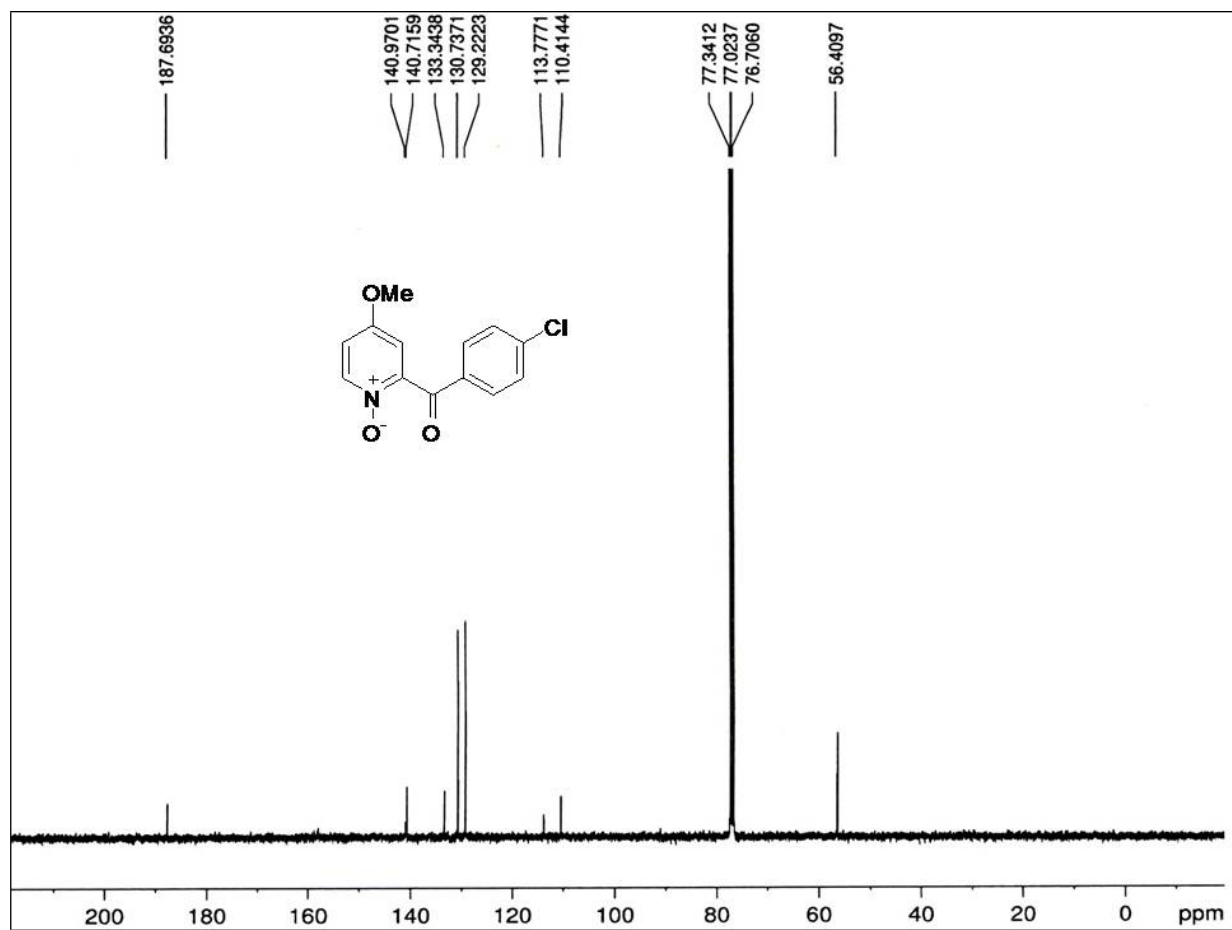

Fig 8.  $^{13}\text{C}$ -NMR spectrum of **3c**

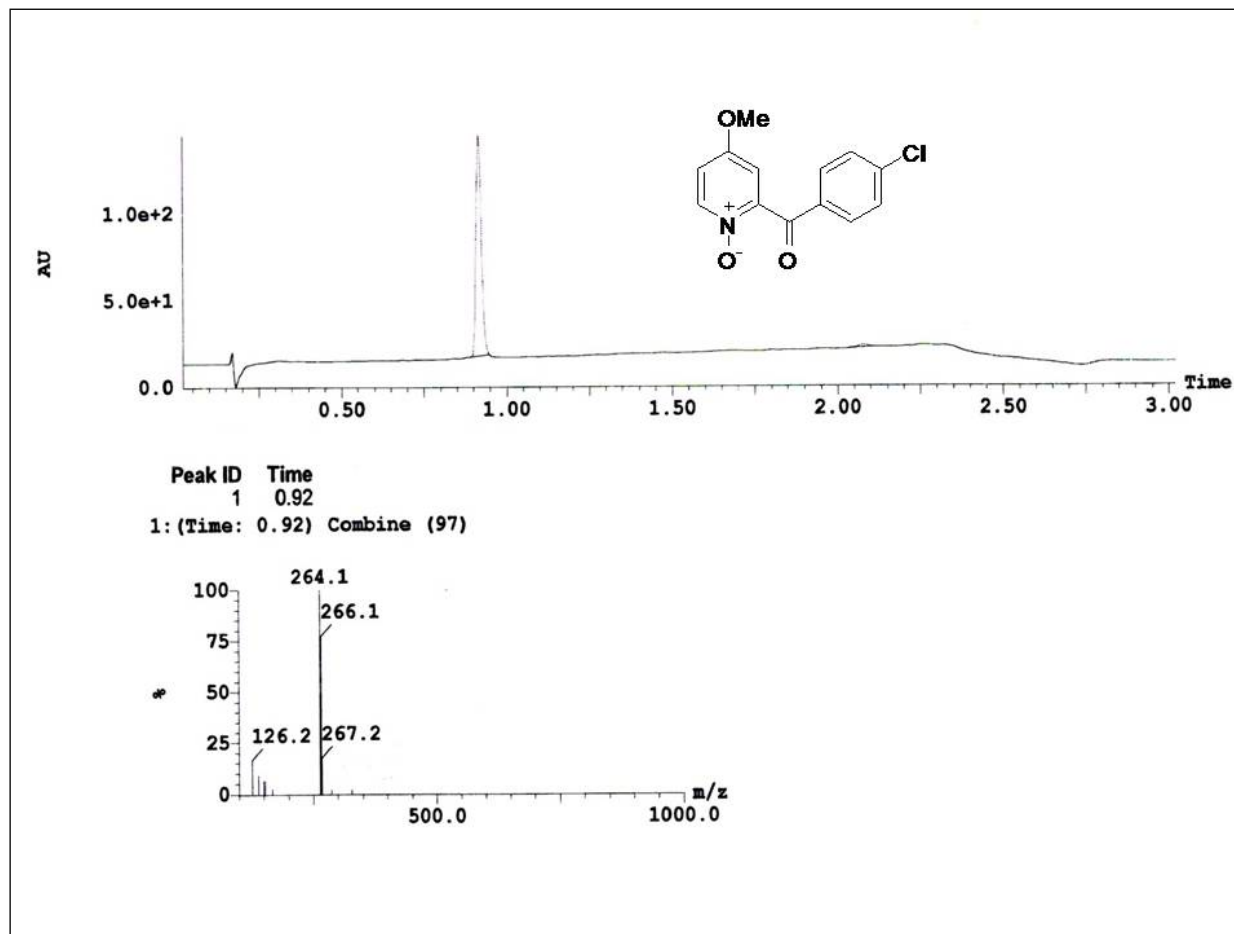

Fig 9. Mass spectrum of 3c

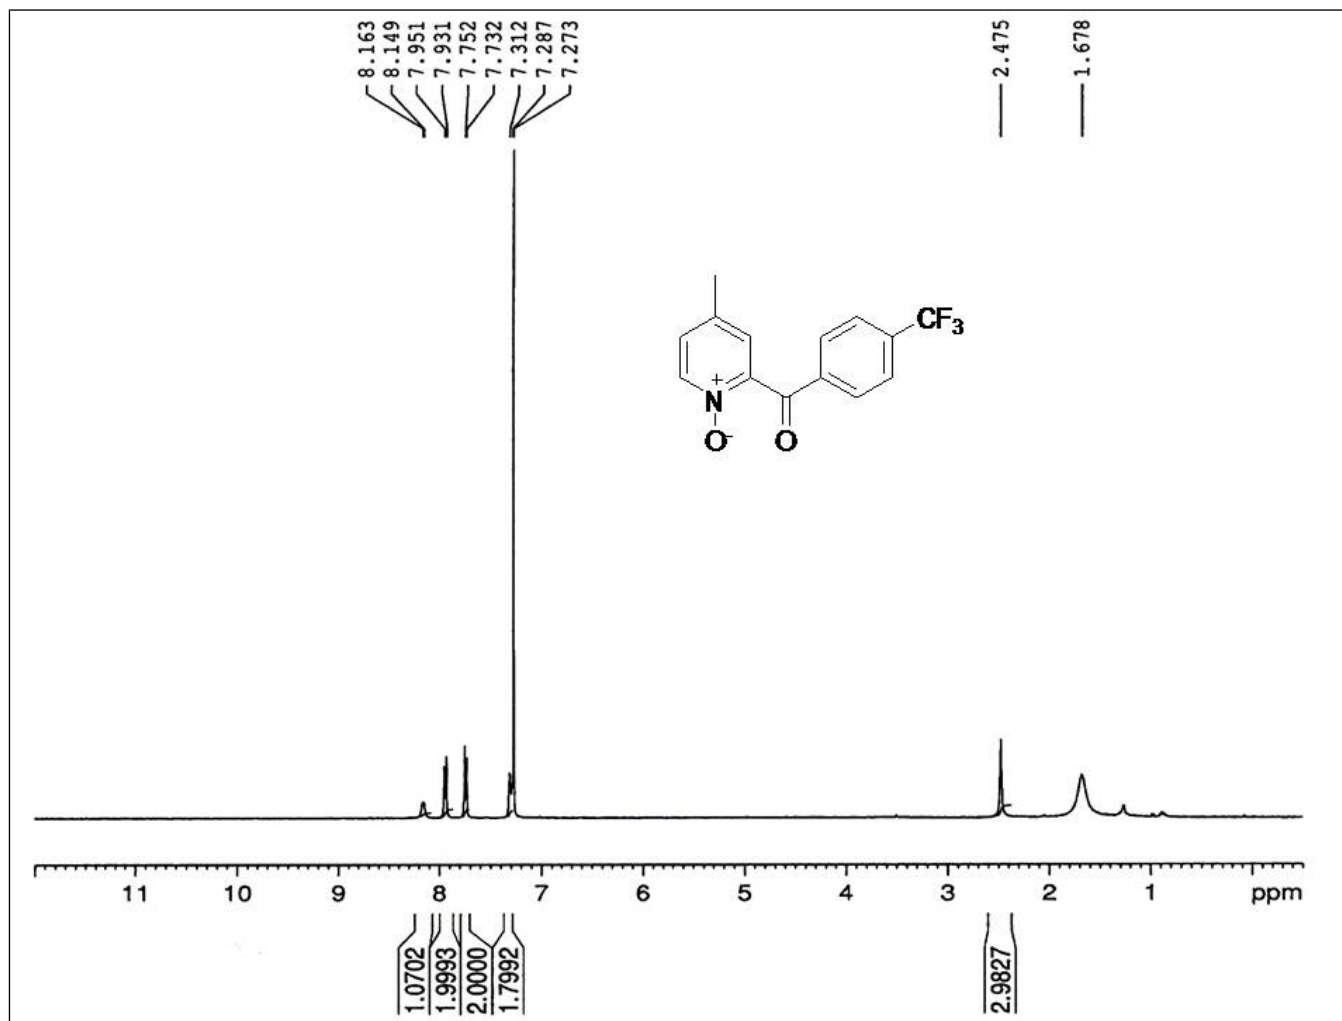

Fig 10. <sup>1</sup>H-NMR spectrum of **3d**



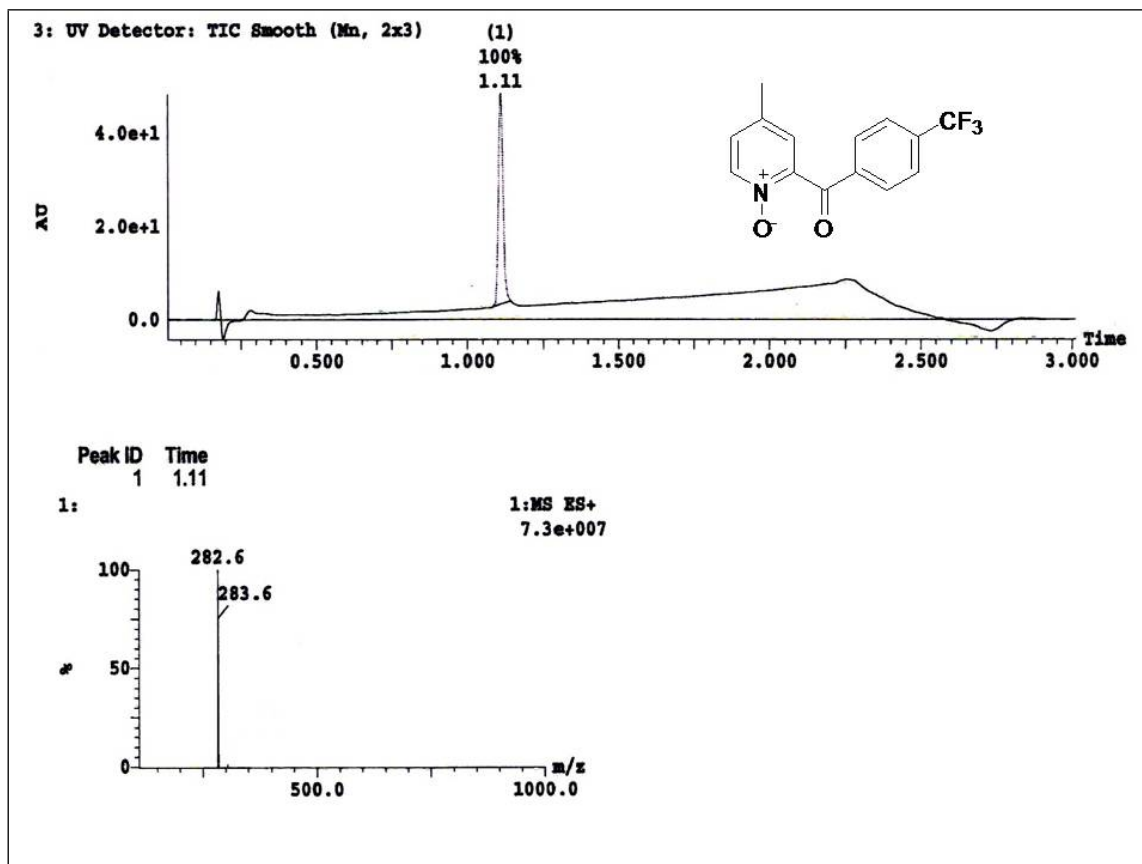

Fig 11. Mass spectrum of **3d**

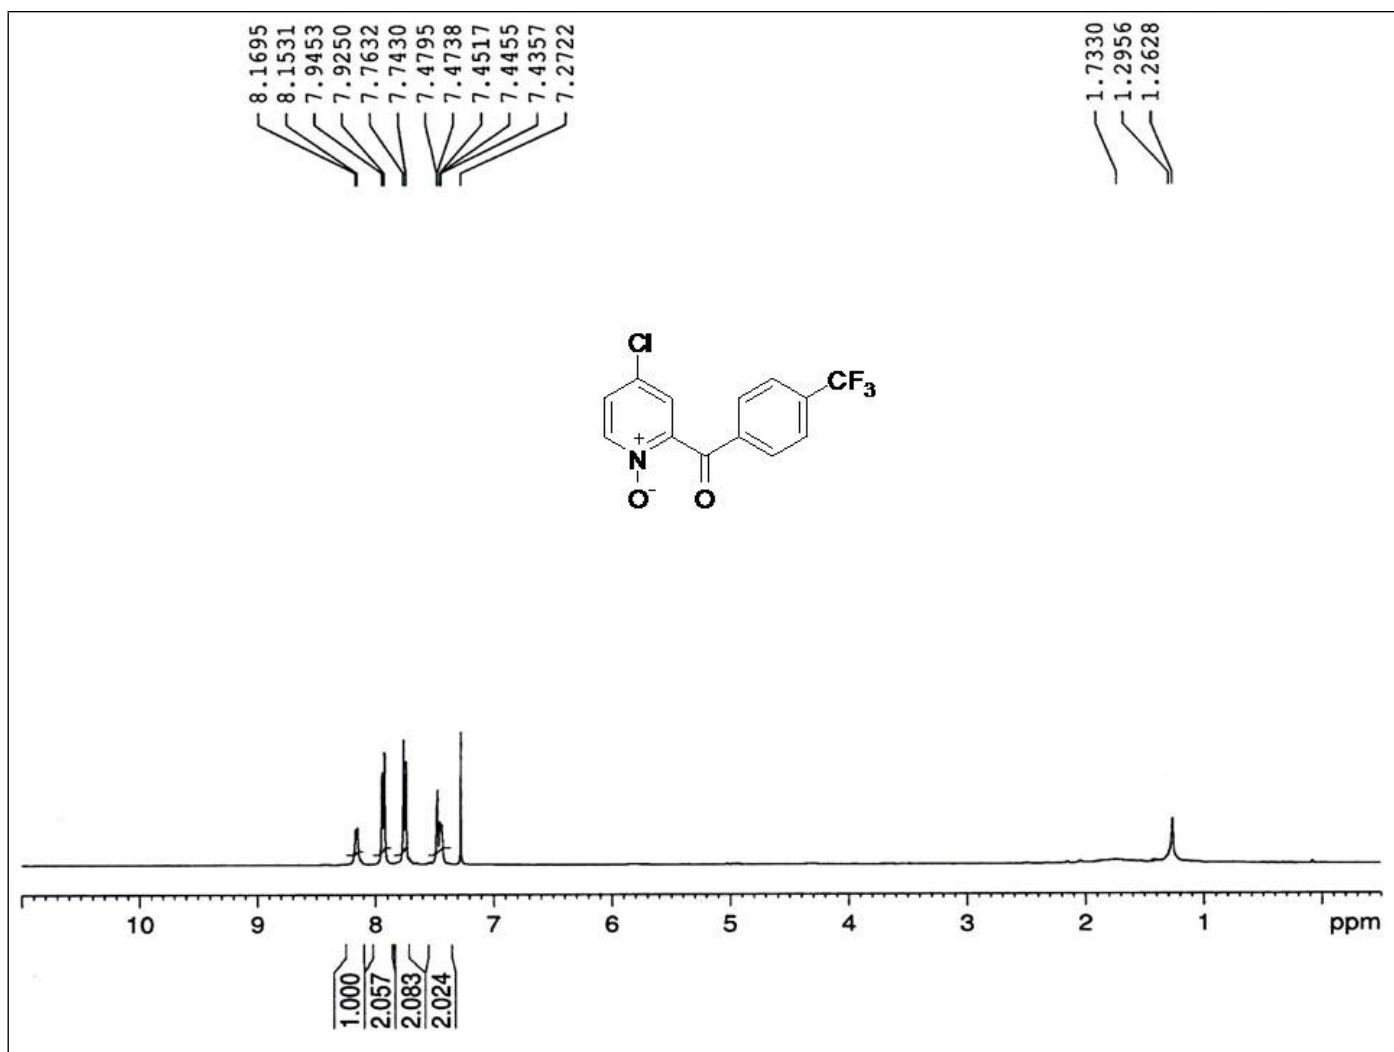

Fig 12. <sup>1</sup>H-NMR spectrum of **3e**

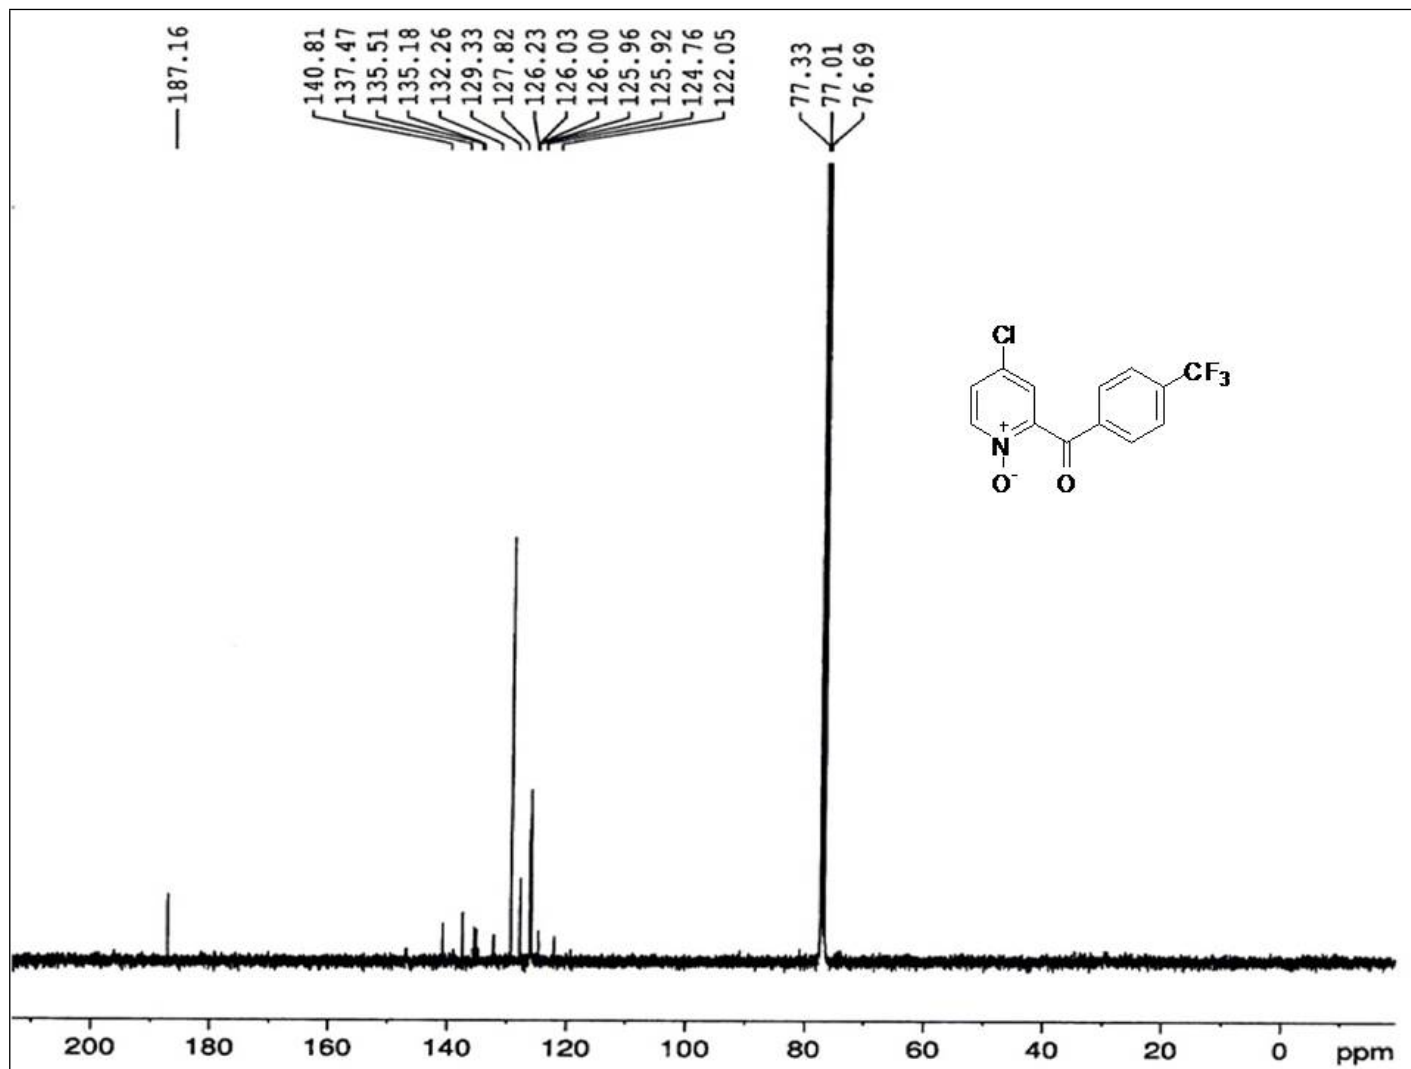

Fig 13.  $^{13}\text{C}$ -NMR spectrum of **3e**

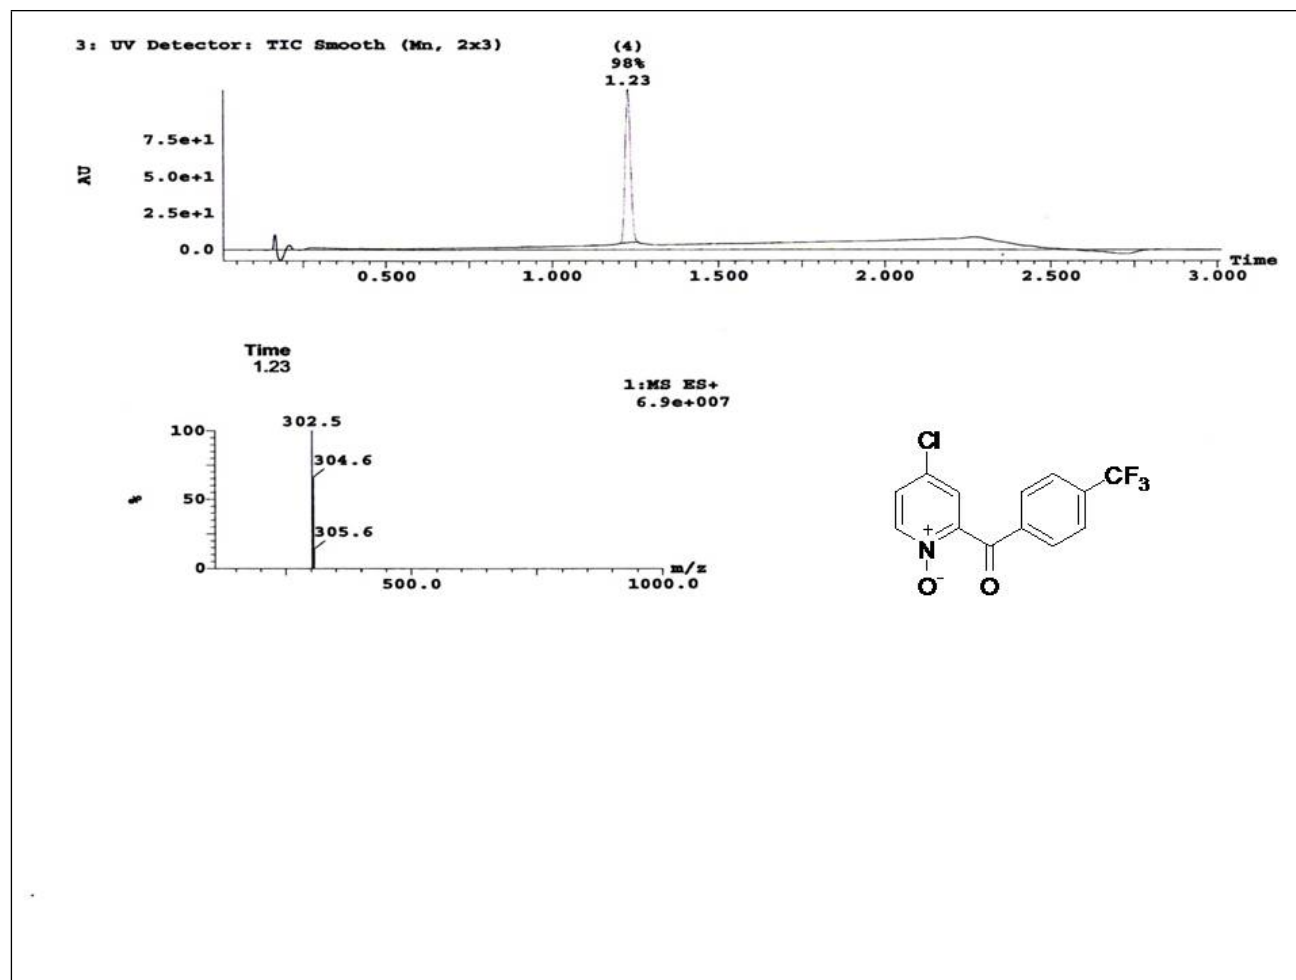

Fig 14. Mass spectrum of **3e**

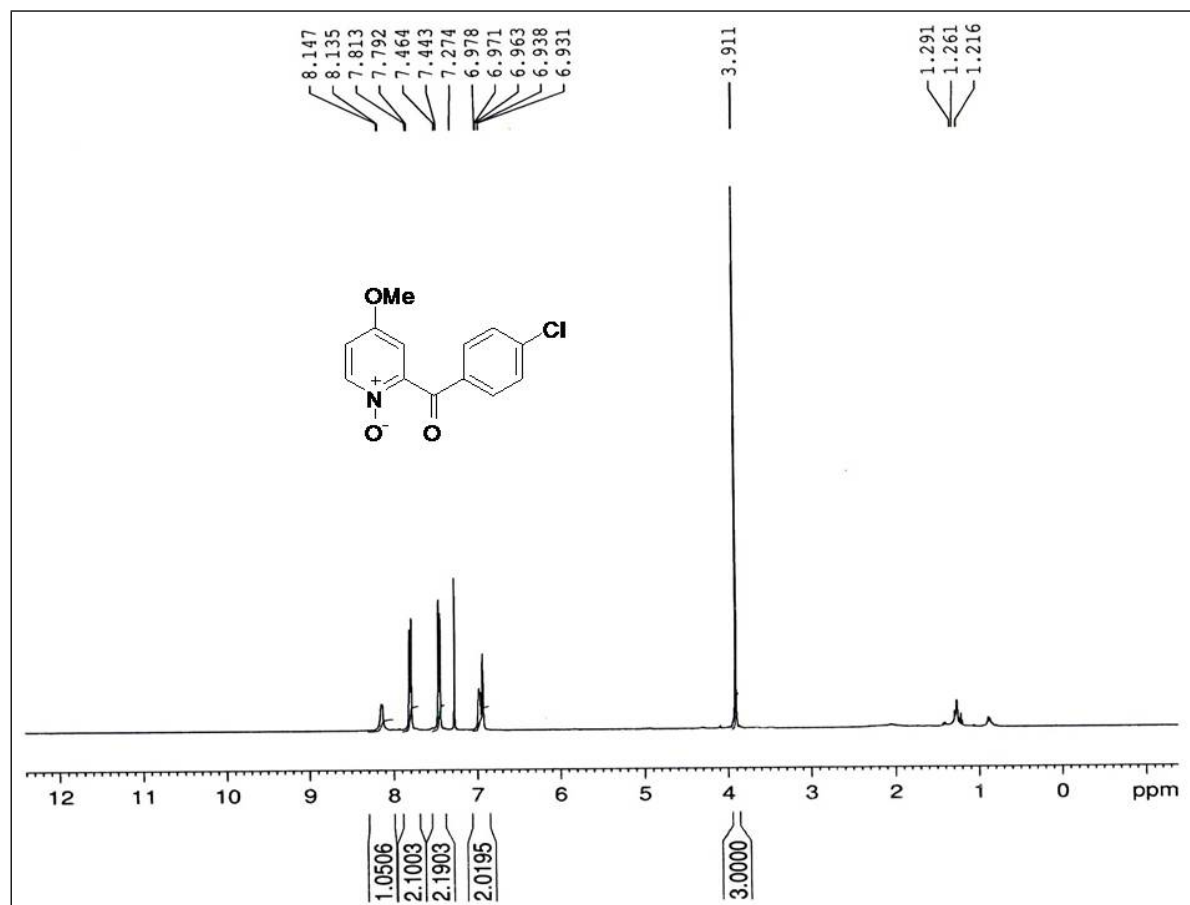

Fig 15. <sup>1</sup>H-NMR spectrum of **3f**

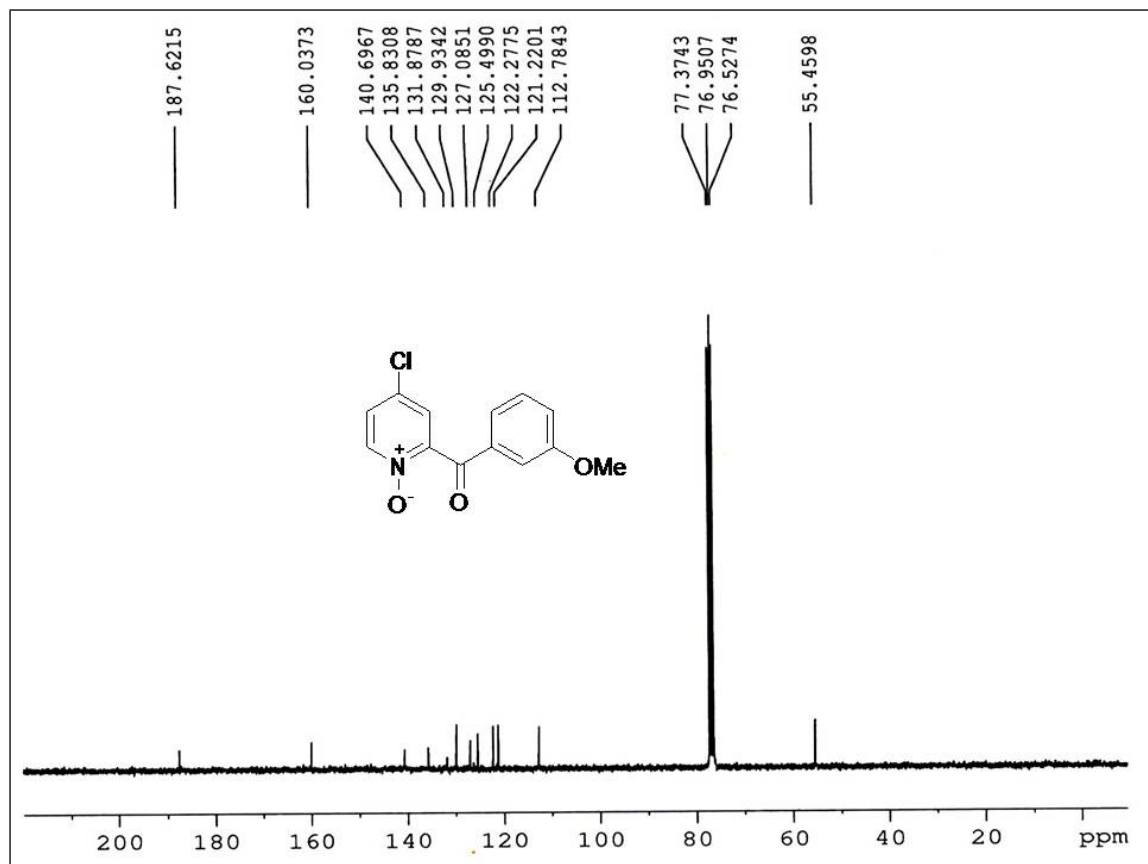

Fig 16.  $^{13}\text{C}$ -NMR spectrum of **3f**

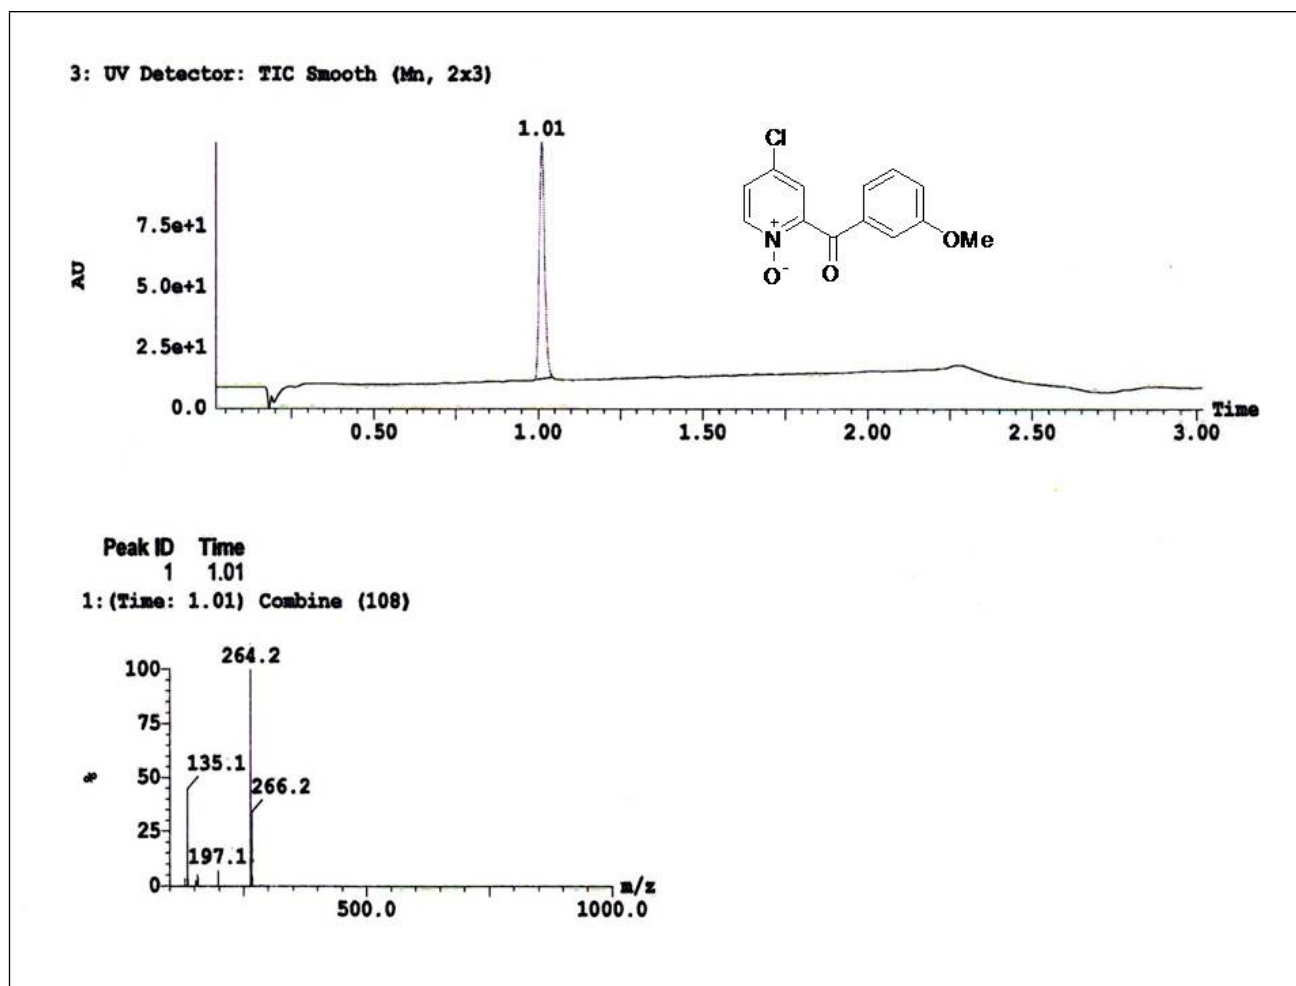

Fig 17. Mass spectrum of **3f**

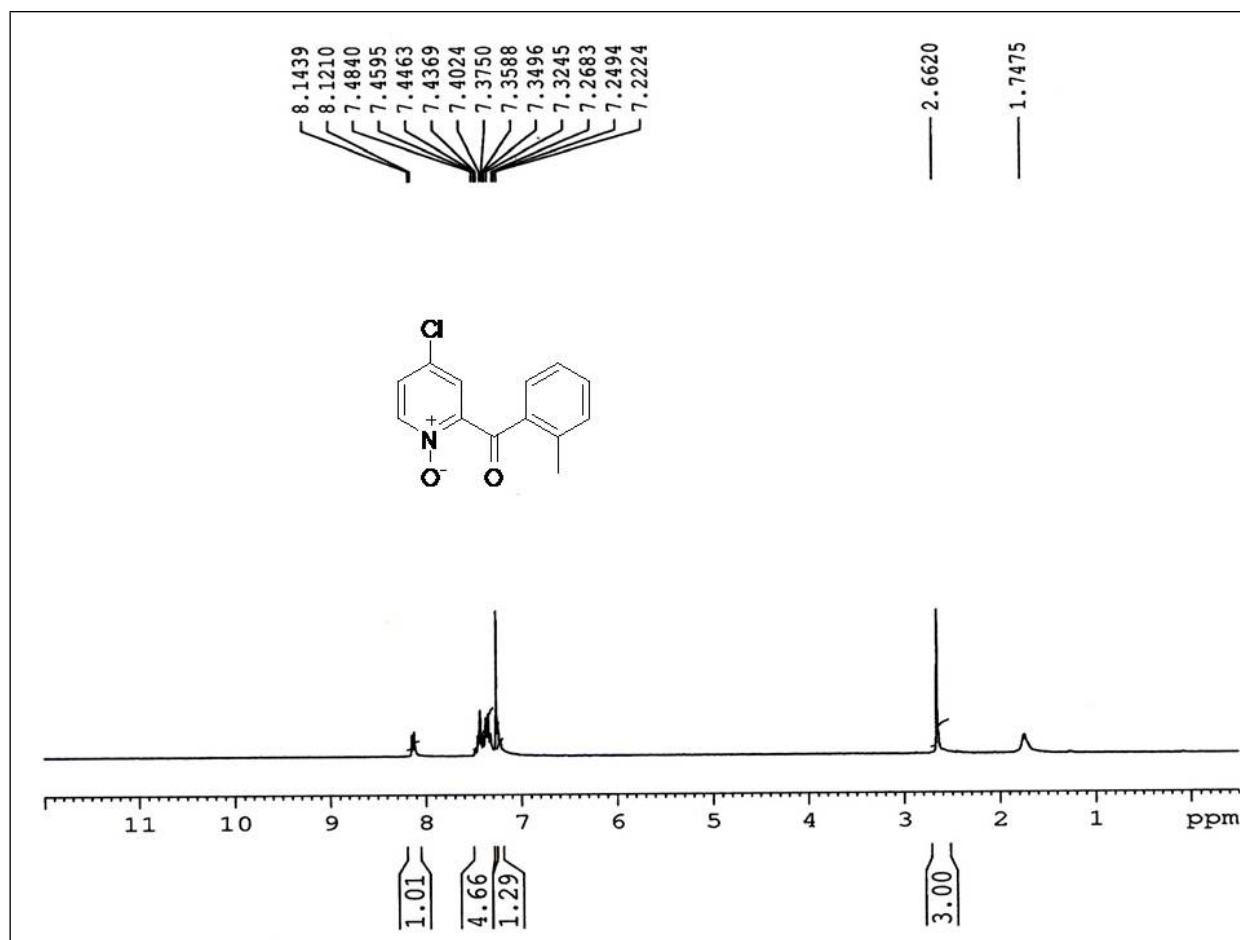

Fig 18. <sup>1</sup>H-NMR spectrum of **3g**



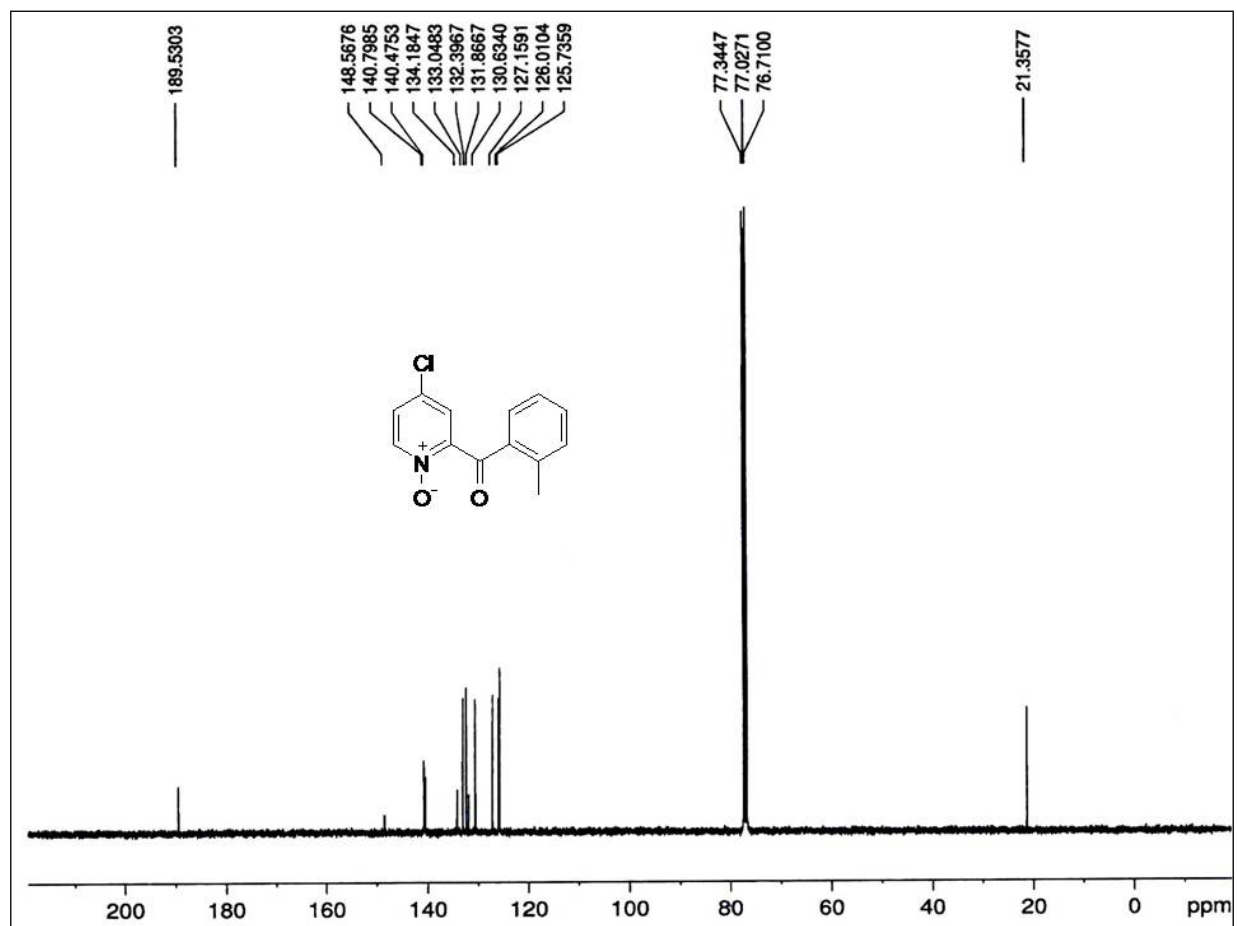

Fig 19.  $^{13}\text{C}$ -NMR spectrum of **3g**

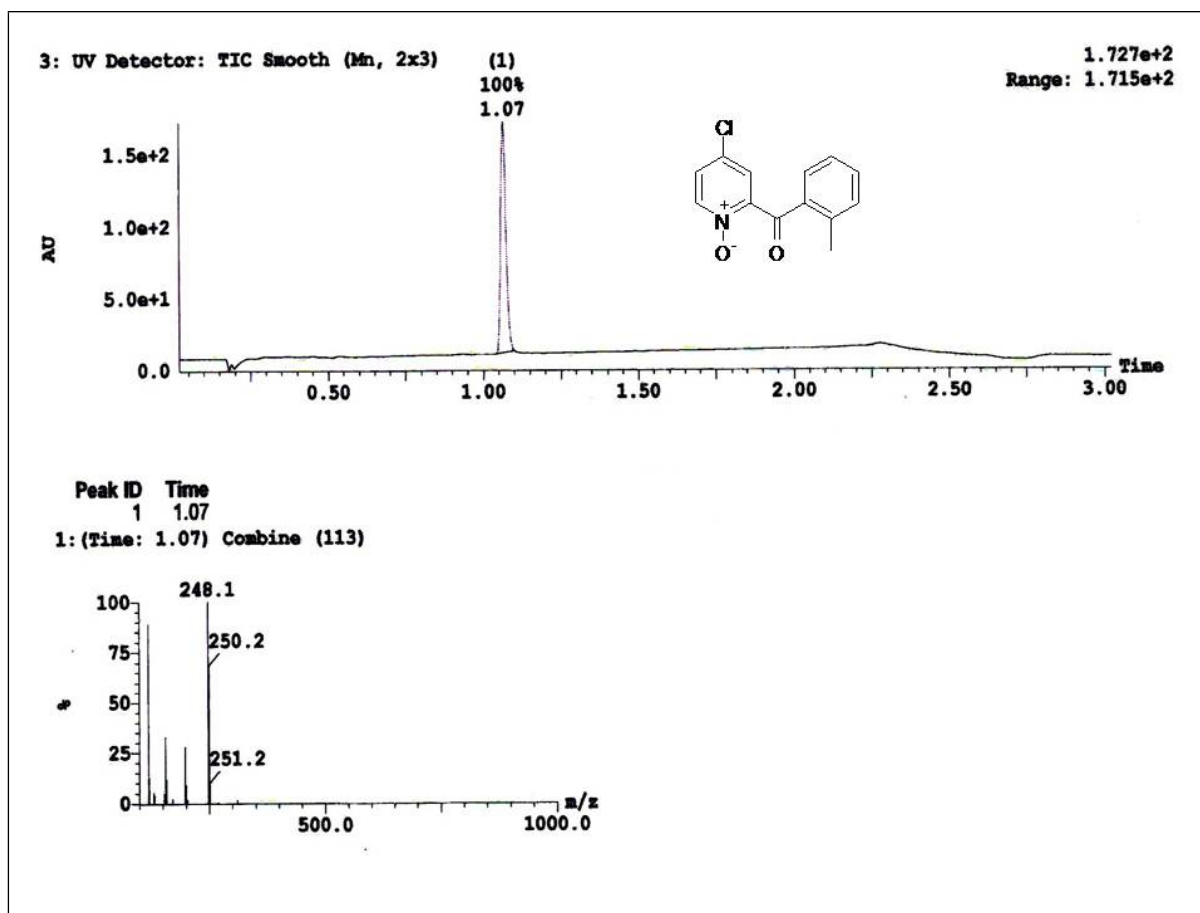

Fig 20. Mass spectrum of 3g

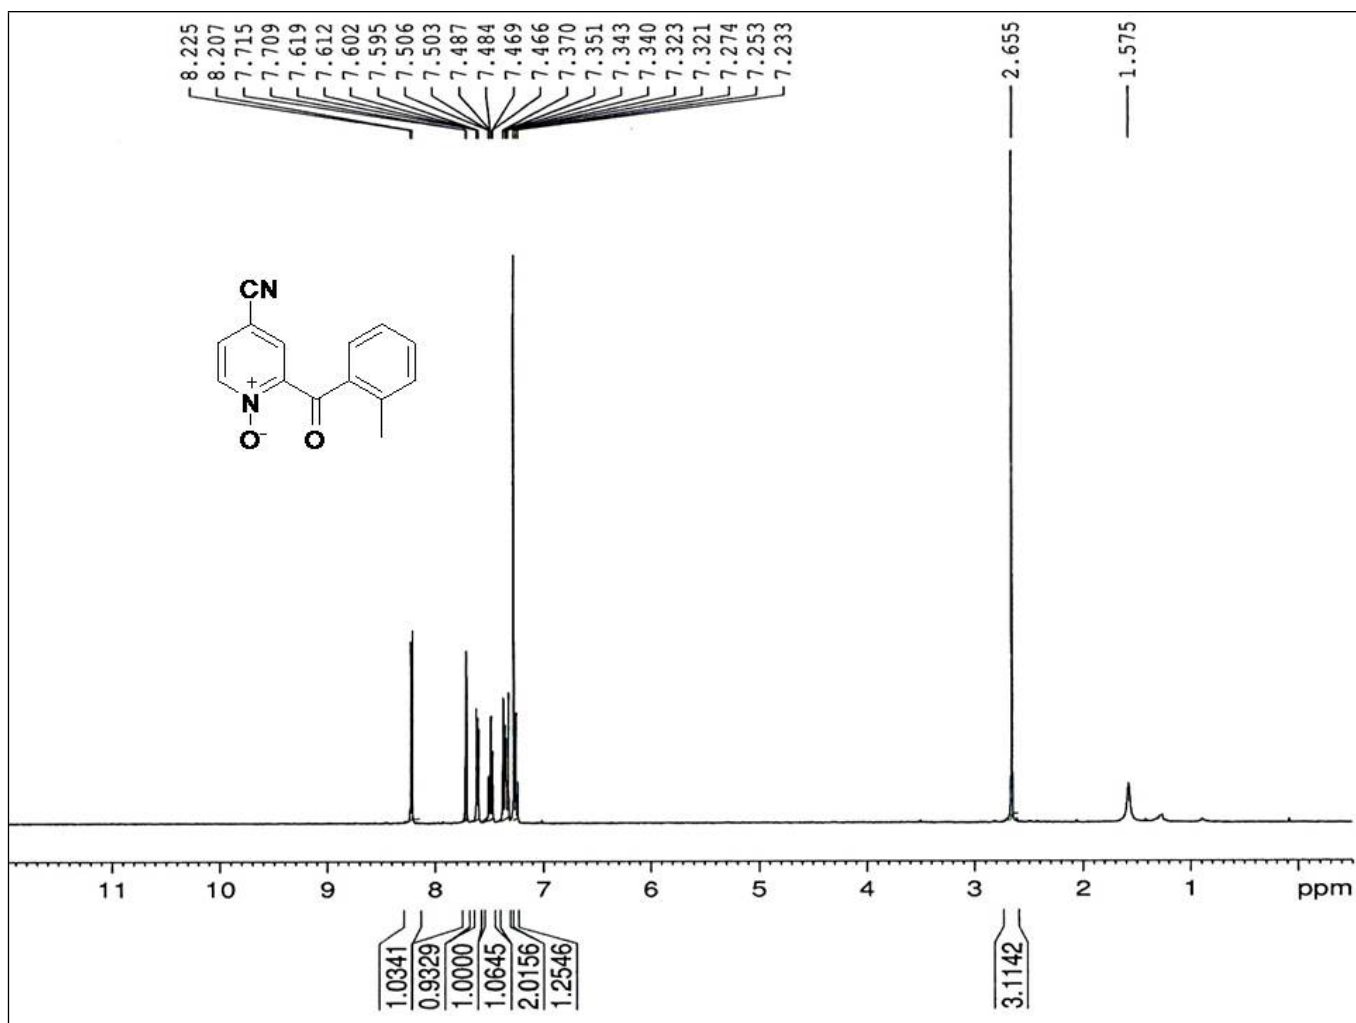

Fig 21. <sup>1</sup>H-NMR spectrum of **3h**

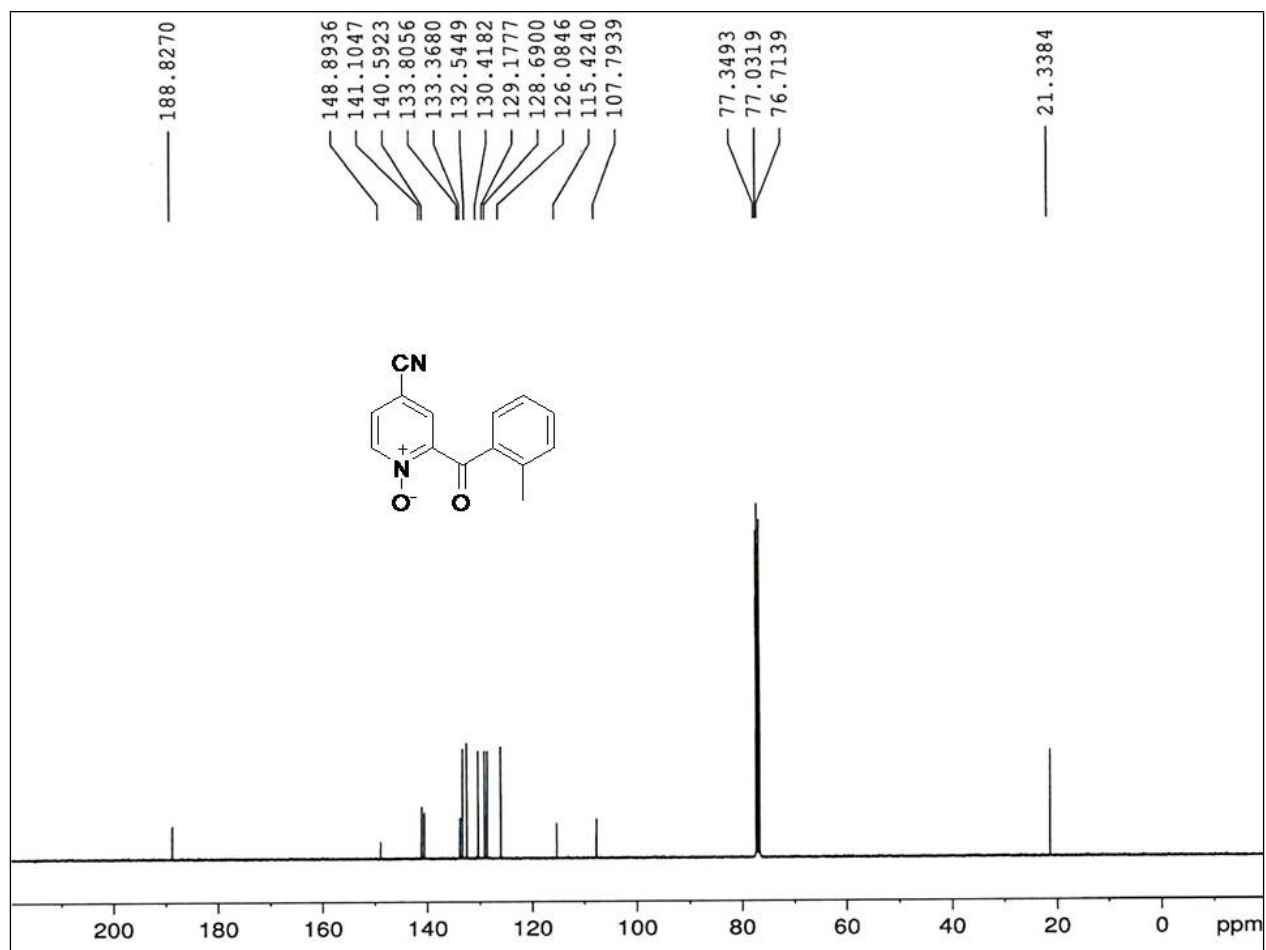

Fig 22. <sup>13</sup>C-NMR spectrum of **3h**

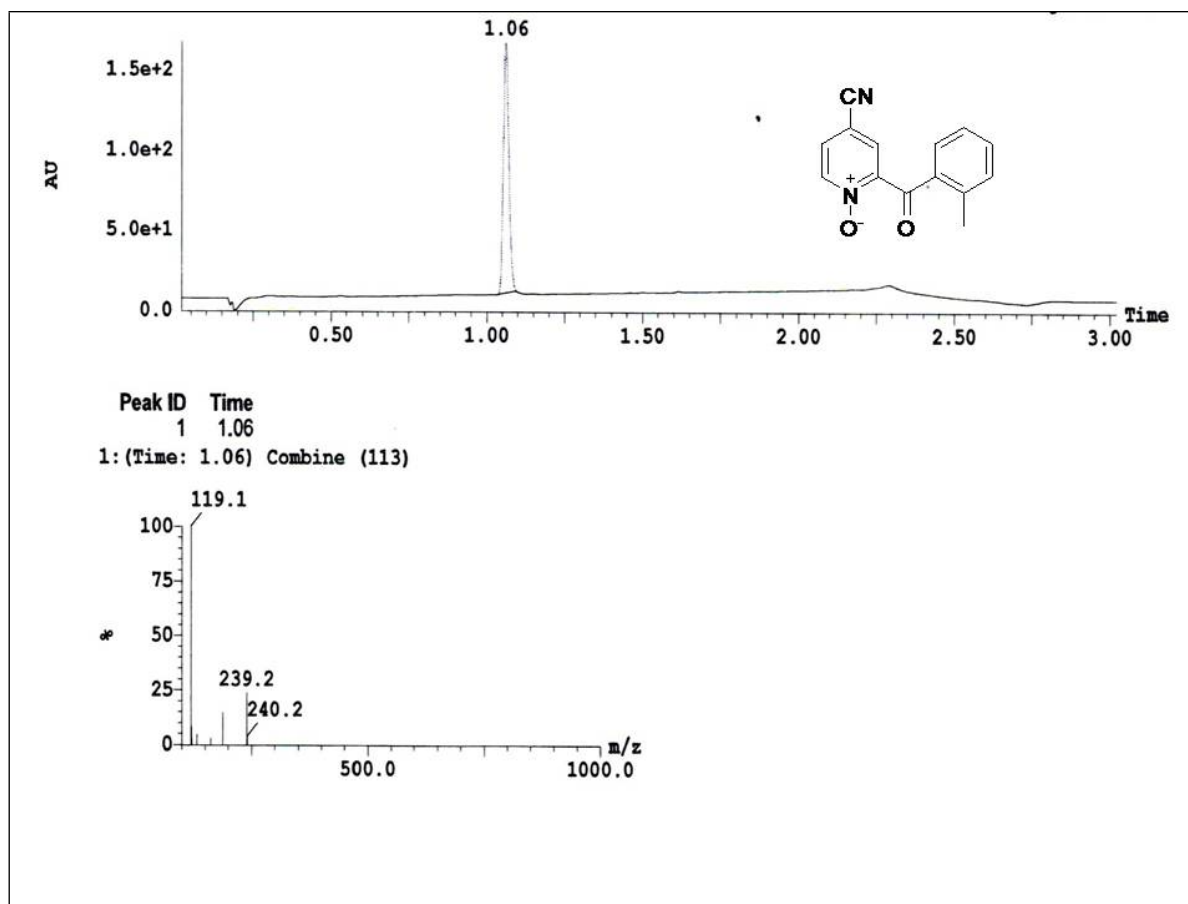

Fig 23. Mass spectrum of **3h**

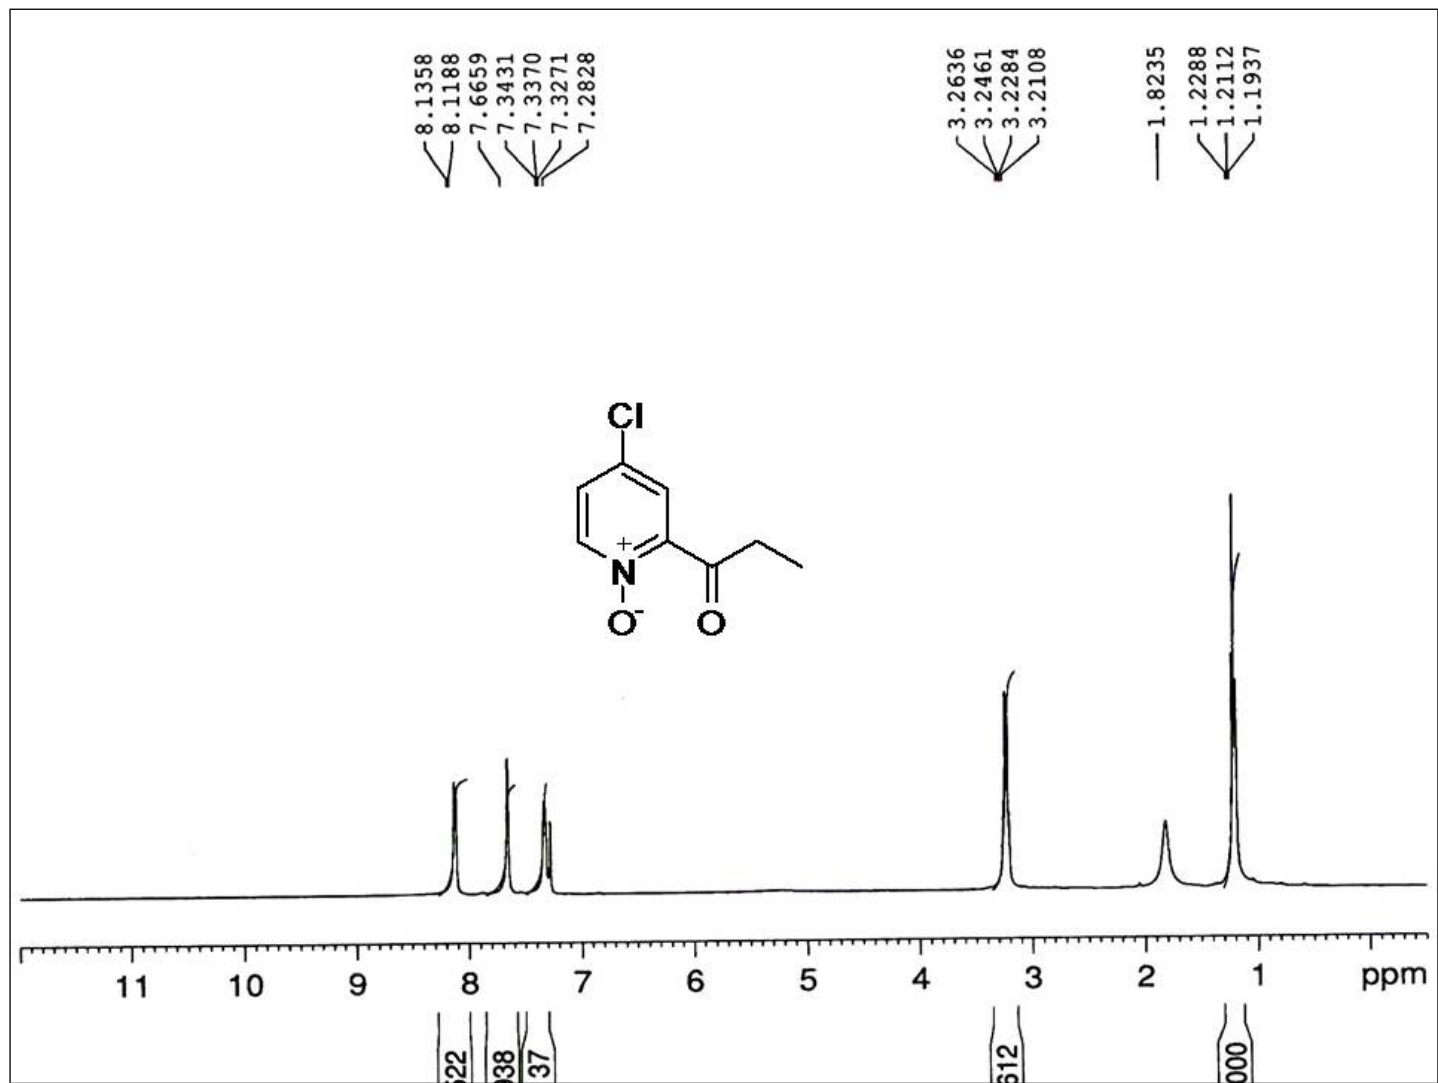

Fig 24. <sup>1</sup>H-NMR spectrum of 3i

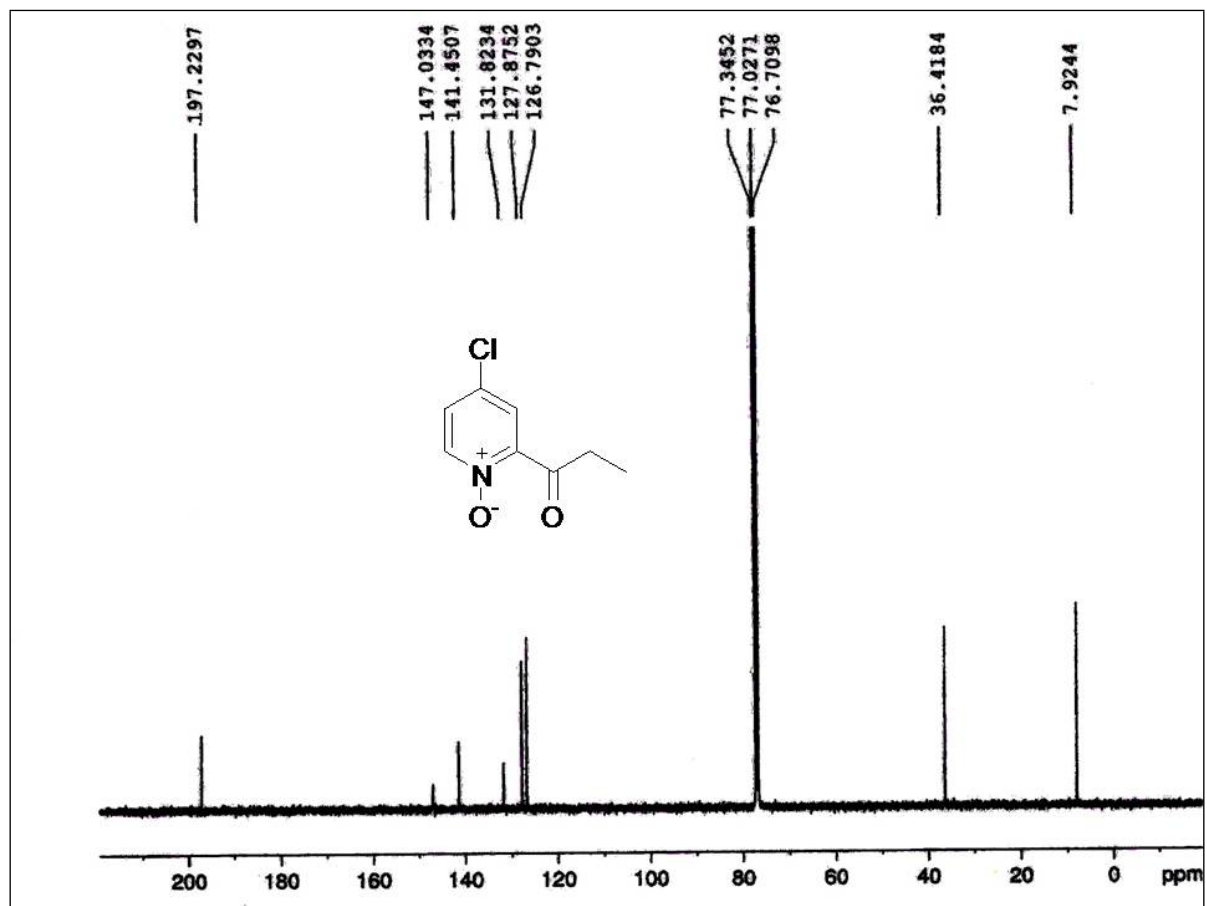

Fig 25.  $^{13}\text{C}$ -NMR spectrum of **3i**

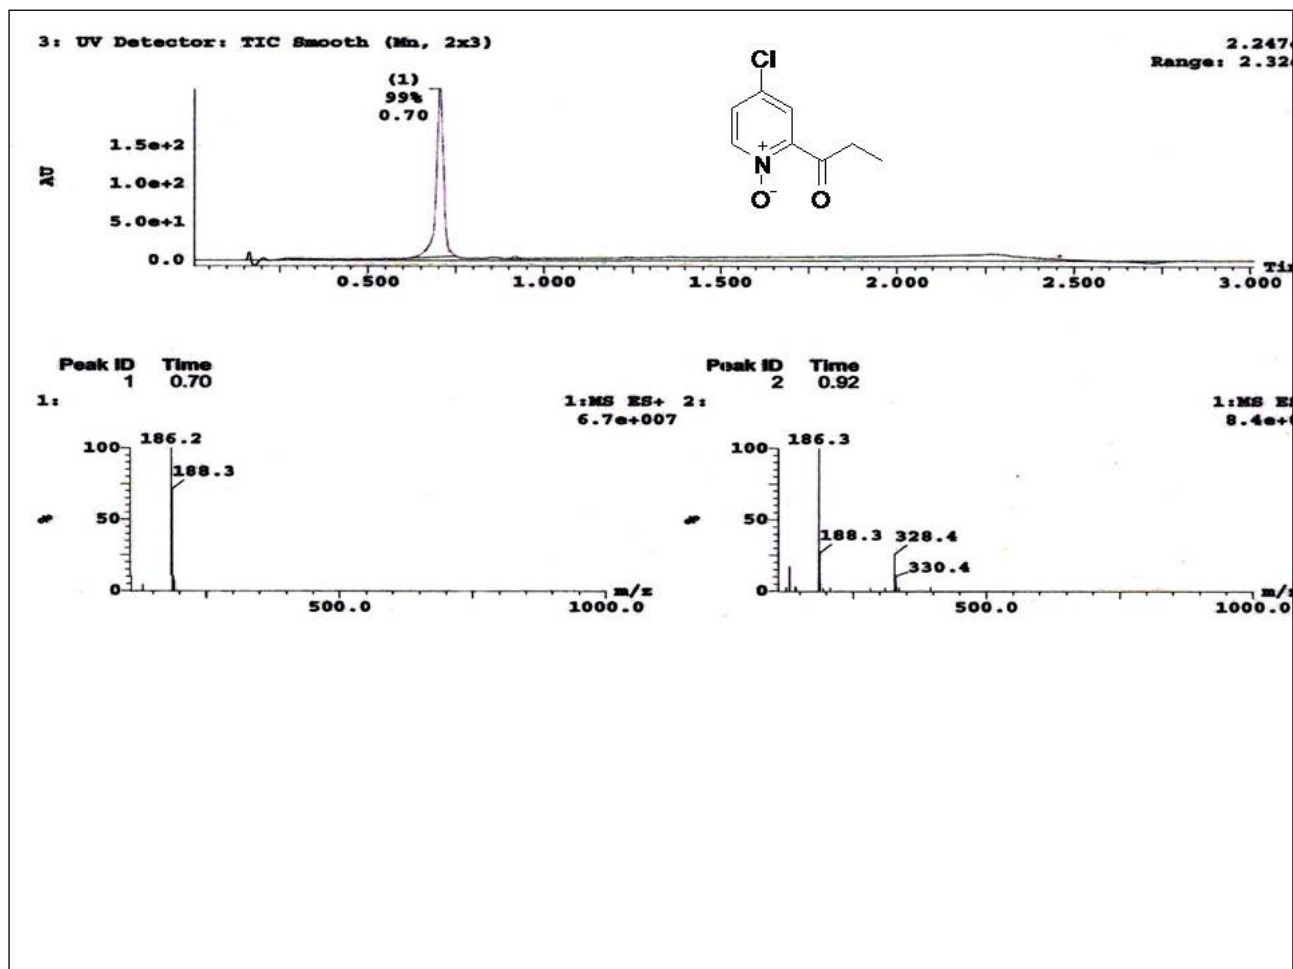

Fig 26. Mass spectrum of 3i



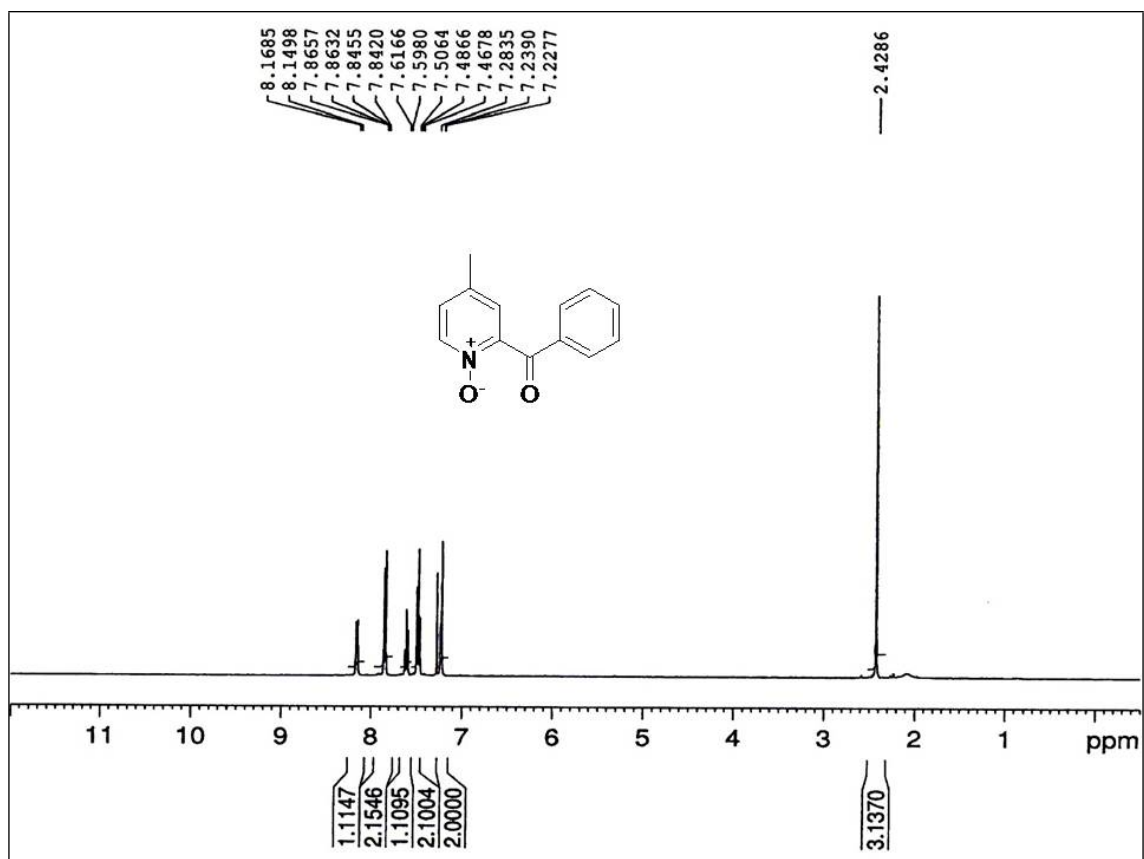

Fig 27. <sup>1</sup>H-NMR spectrum of **3j**

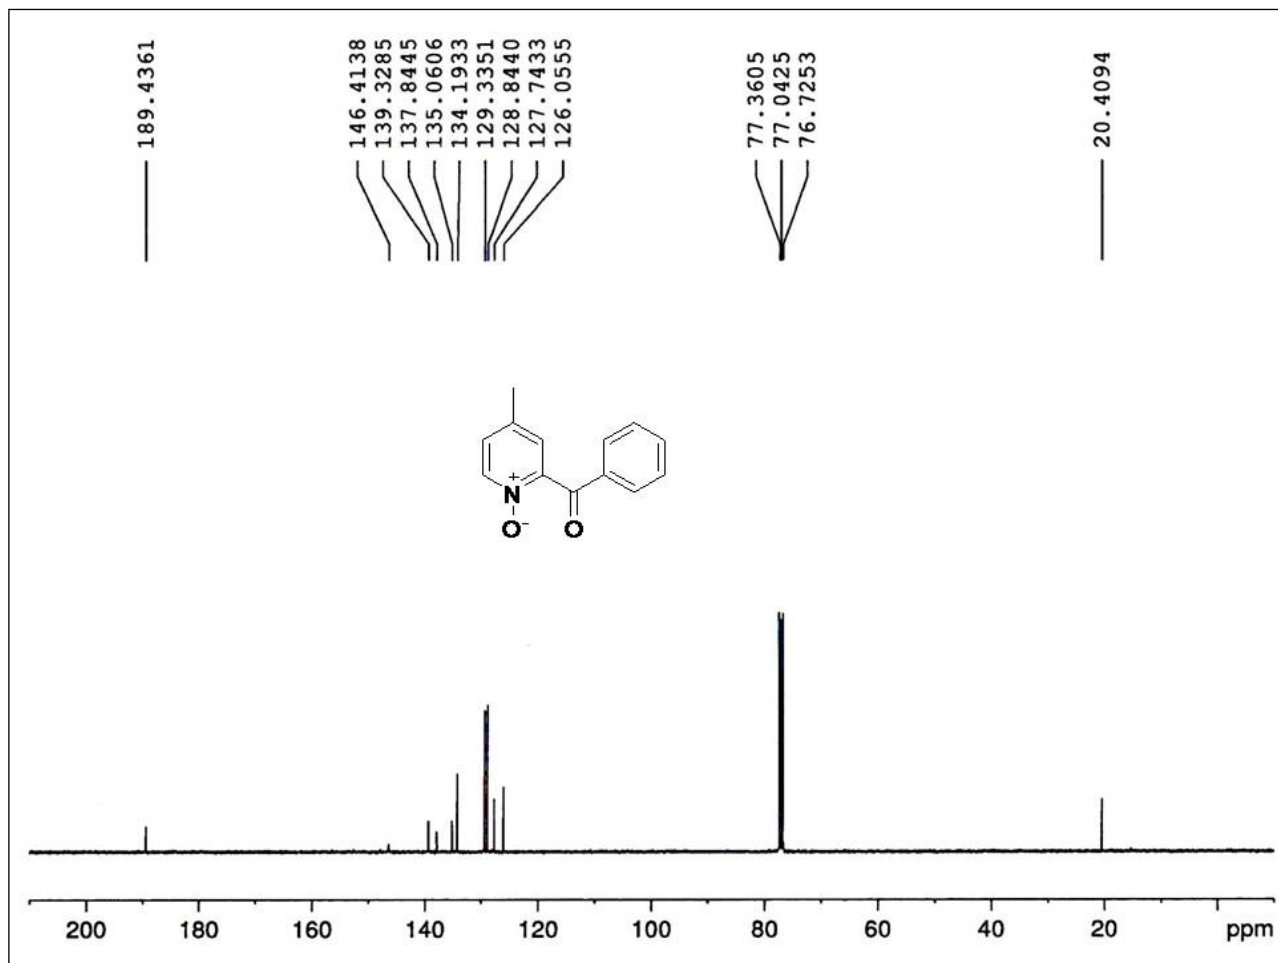

Fig 28.  $^{13}\text{C}$ -NMR spectrum of **3j**

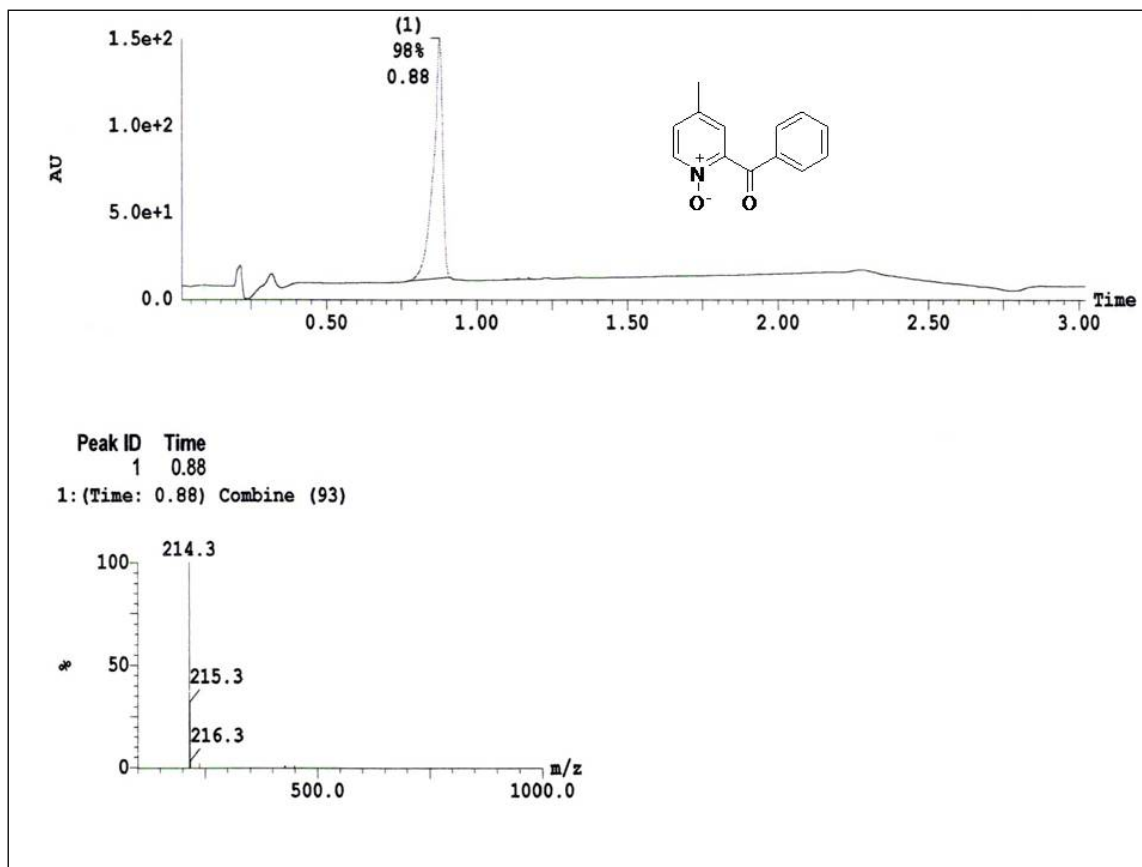

Fig 29. Mass spectrum of **3j**

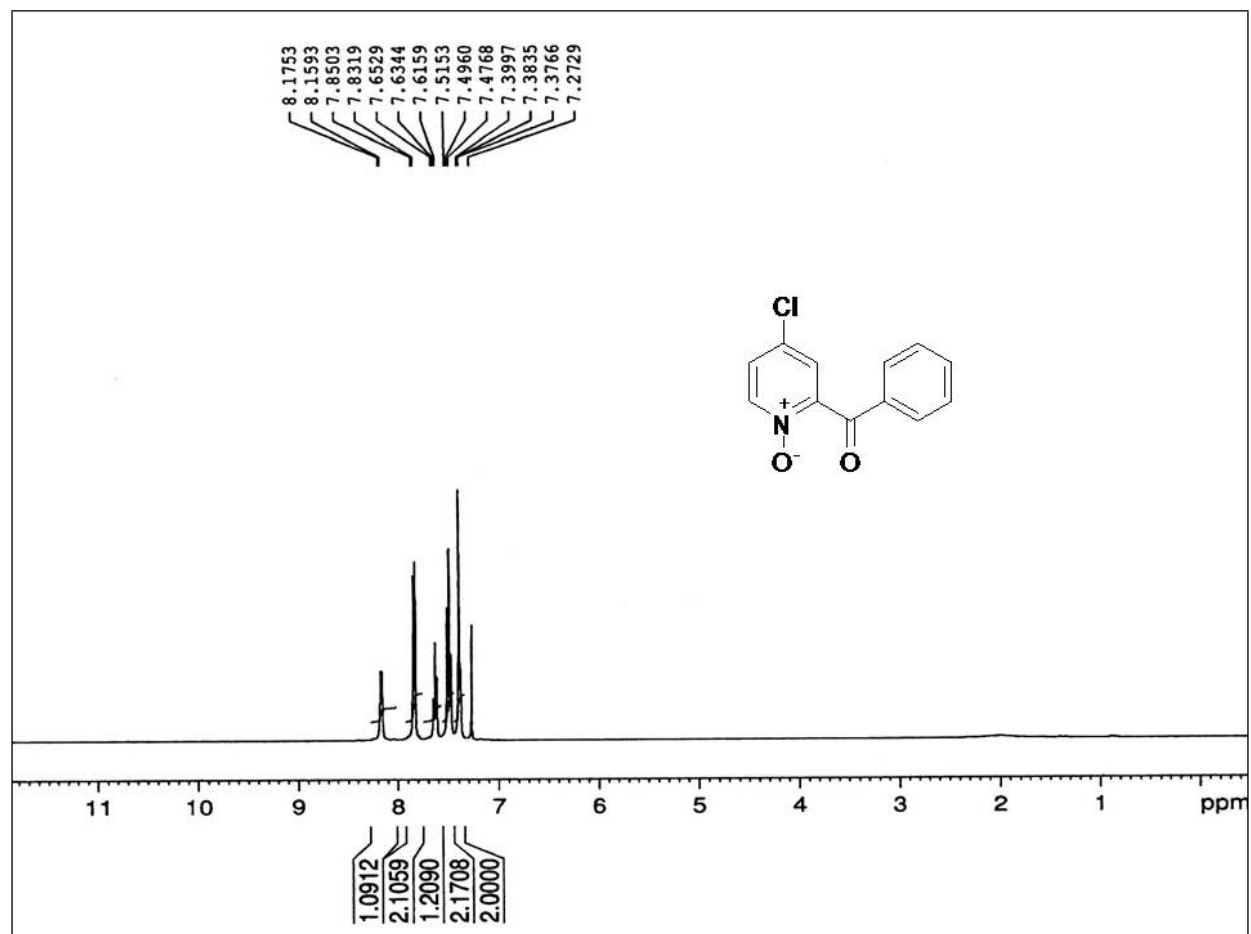

Fig 30. <sup>1</sup>H-NMR spectrum of **3k**

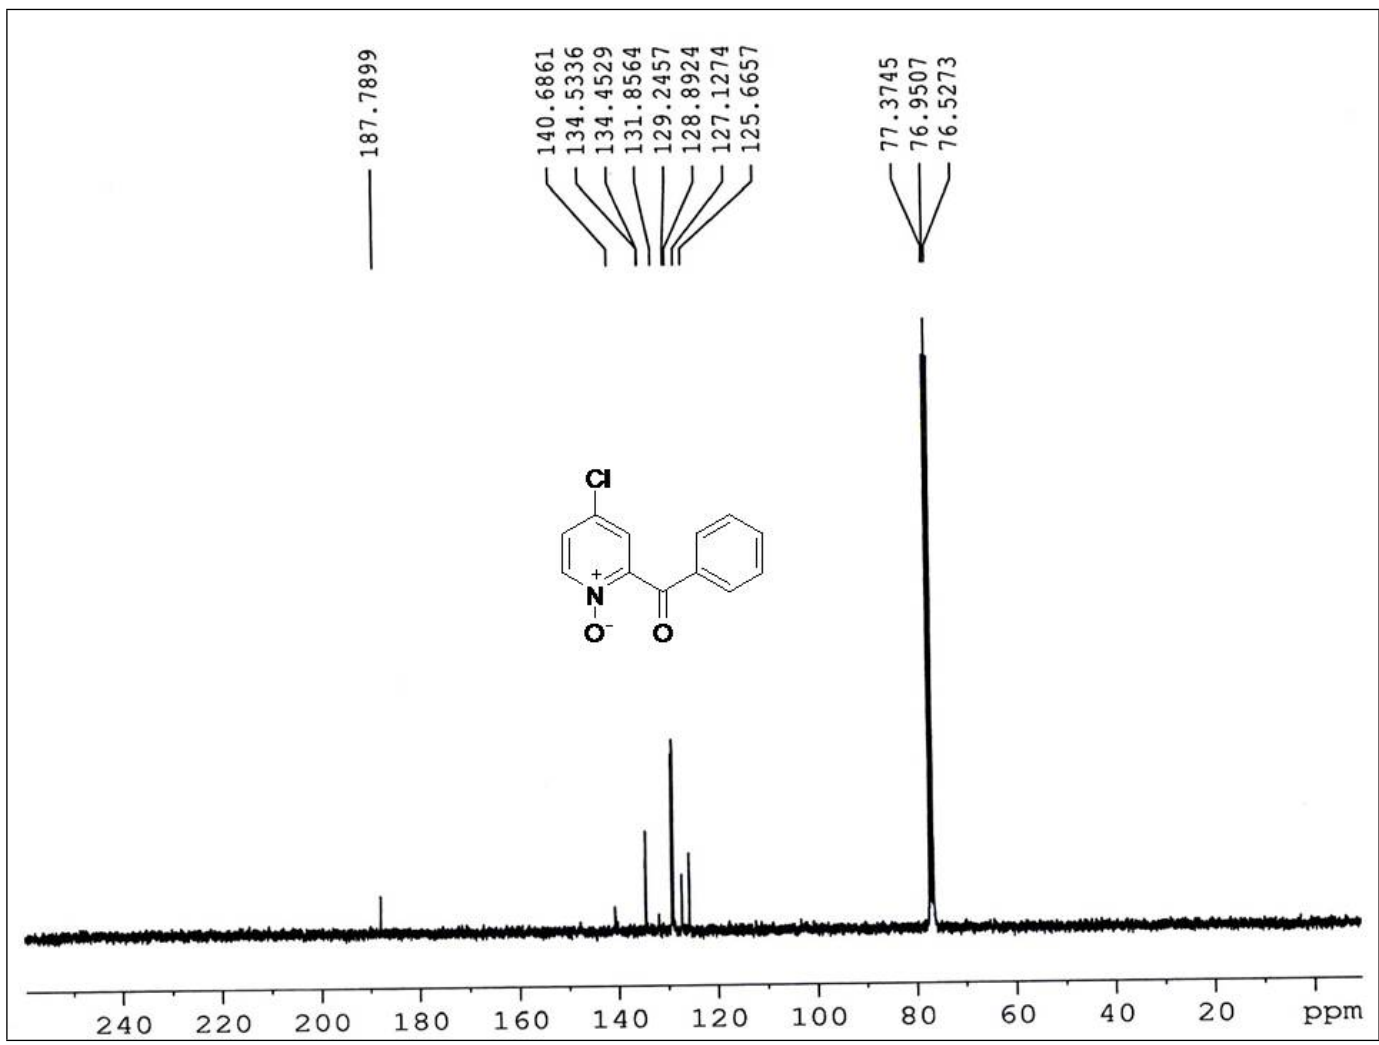

Fig 31. <sup>13</sup>C-NMR spectrum of 3k

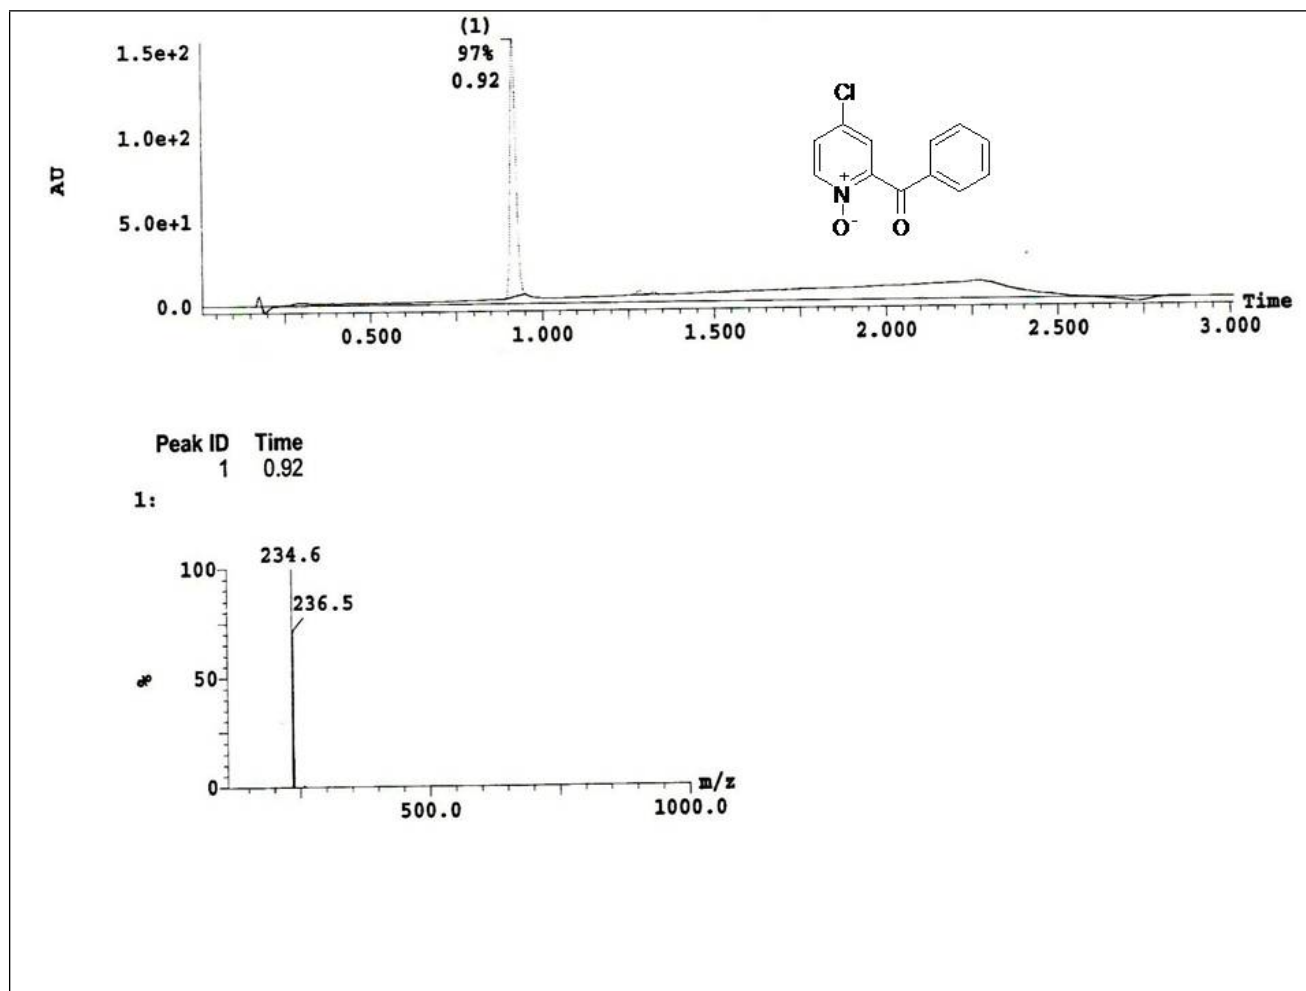

Fig 32. Mass spectrum of 3k

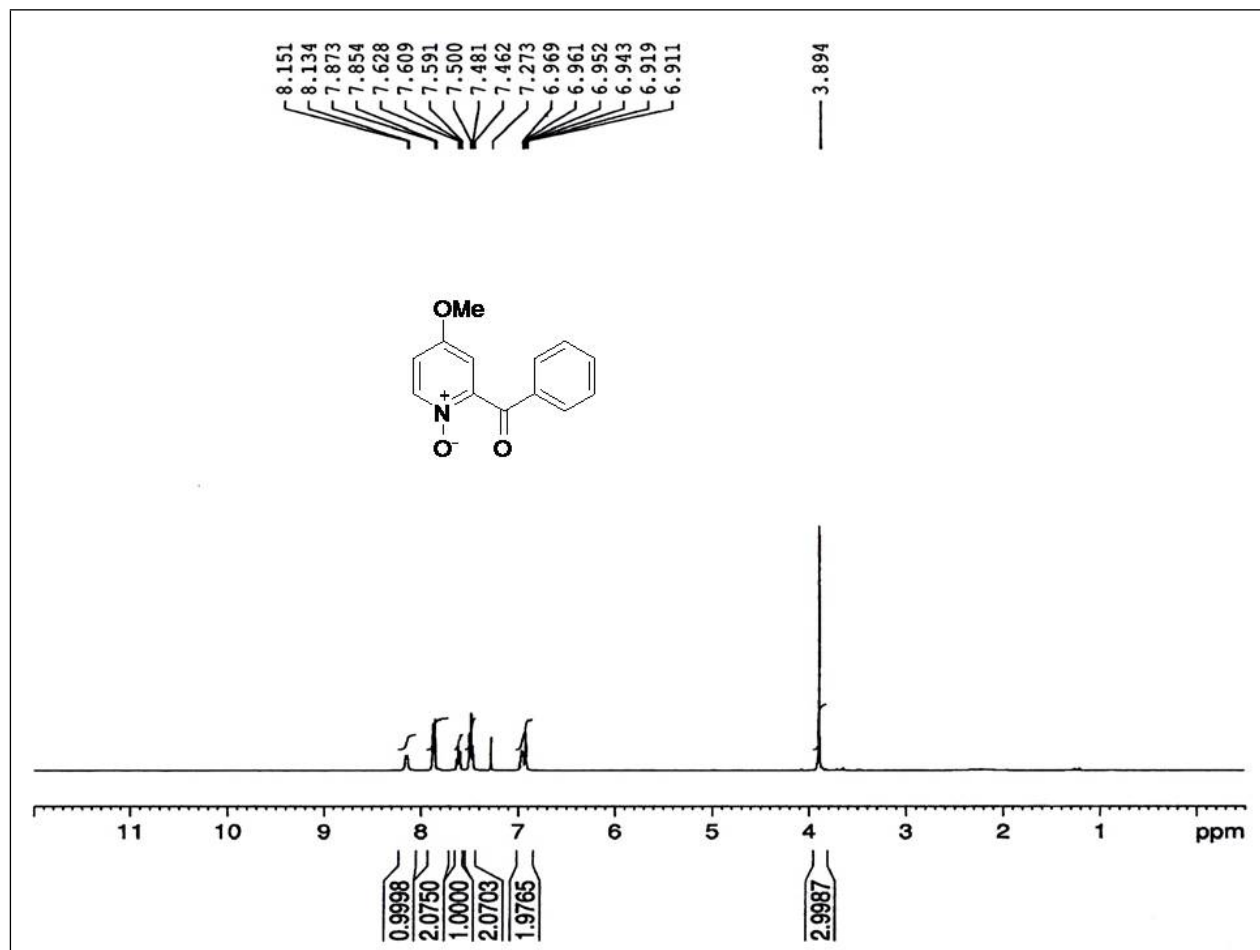

Fig 33. <sup>1</sup>H-NMR spectrum of **31**

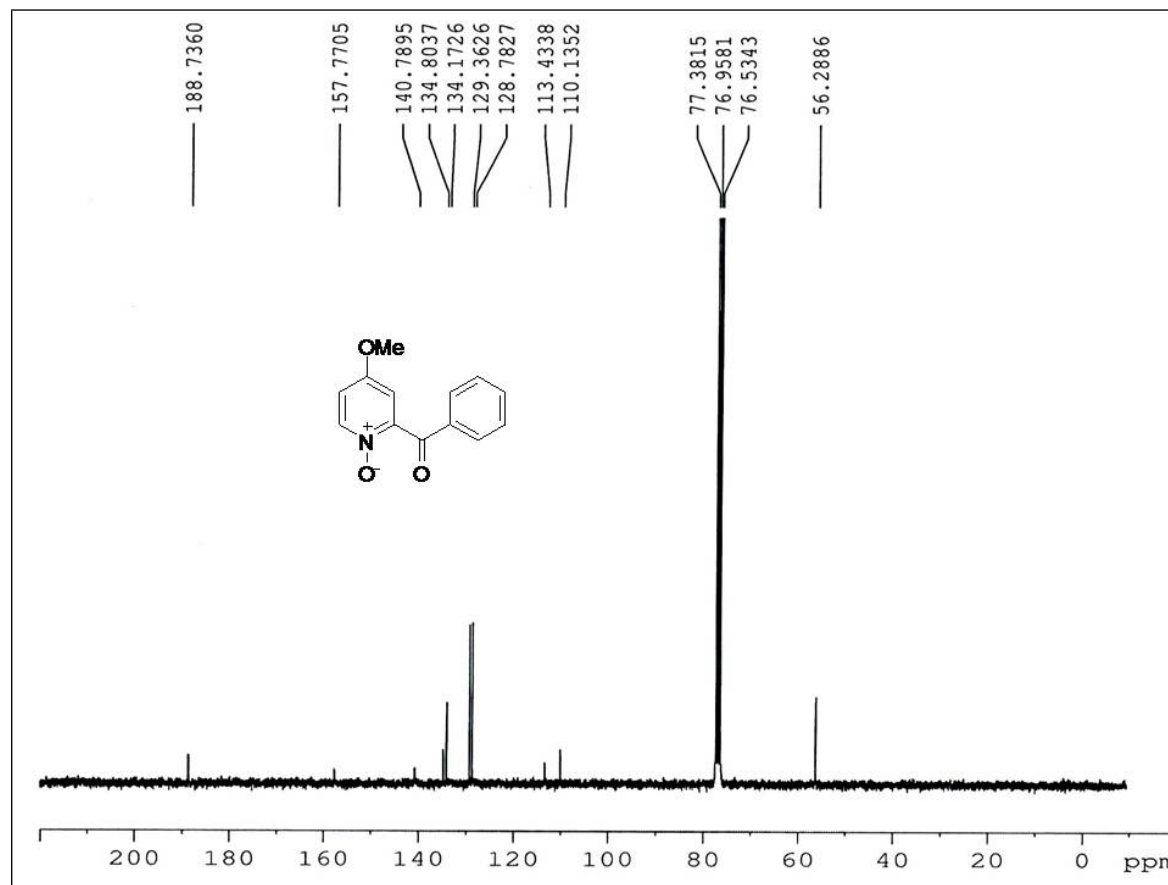

Fig 34.  $^{13}\text{C}$ -NMR spectrum of **31**



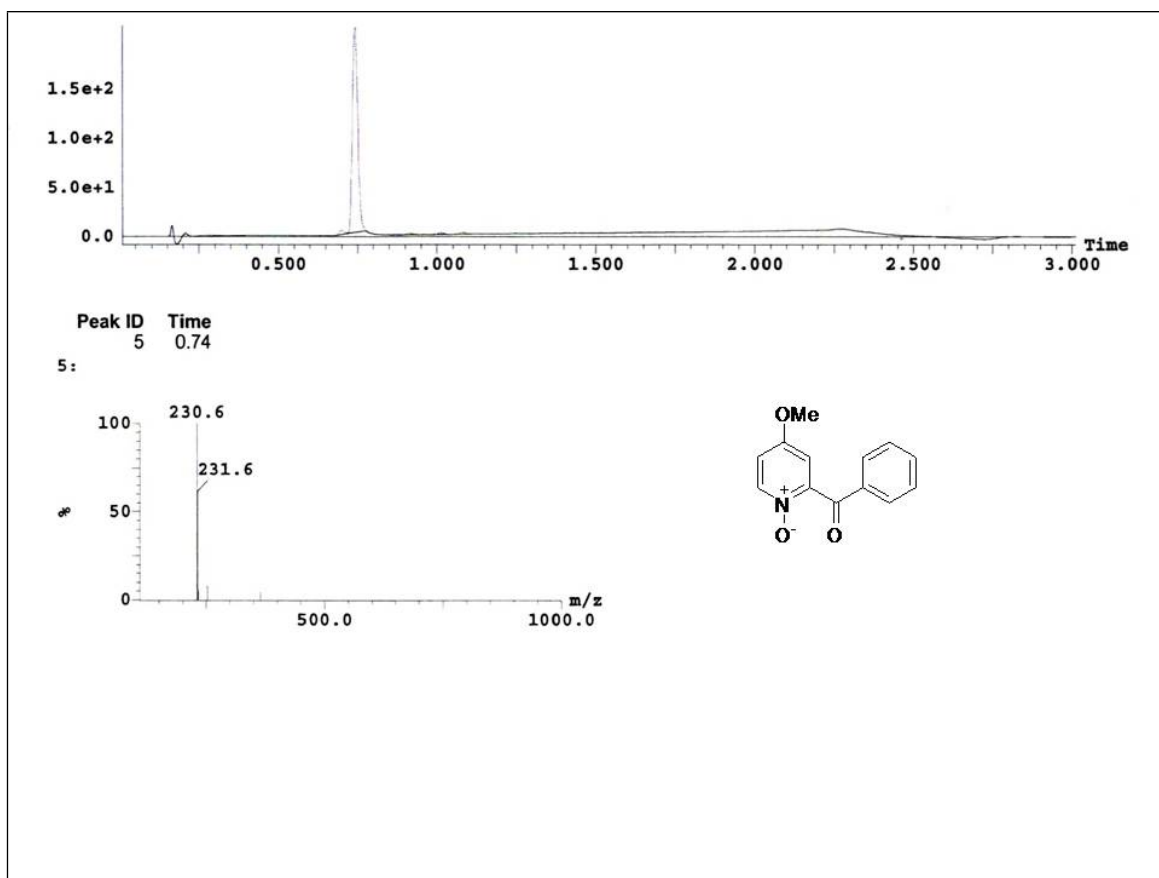

Fig 35. Mass spectrum of **31**

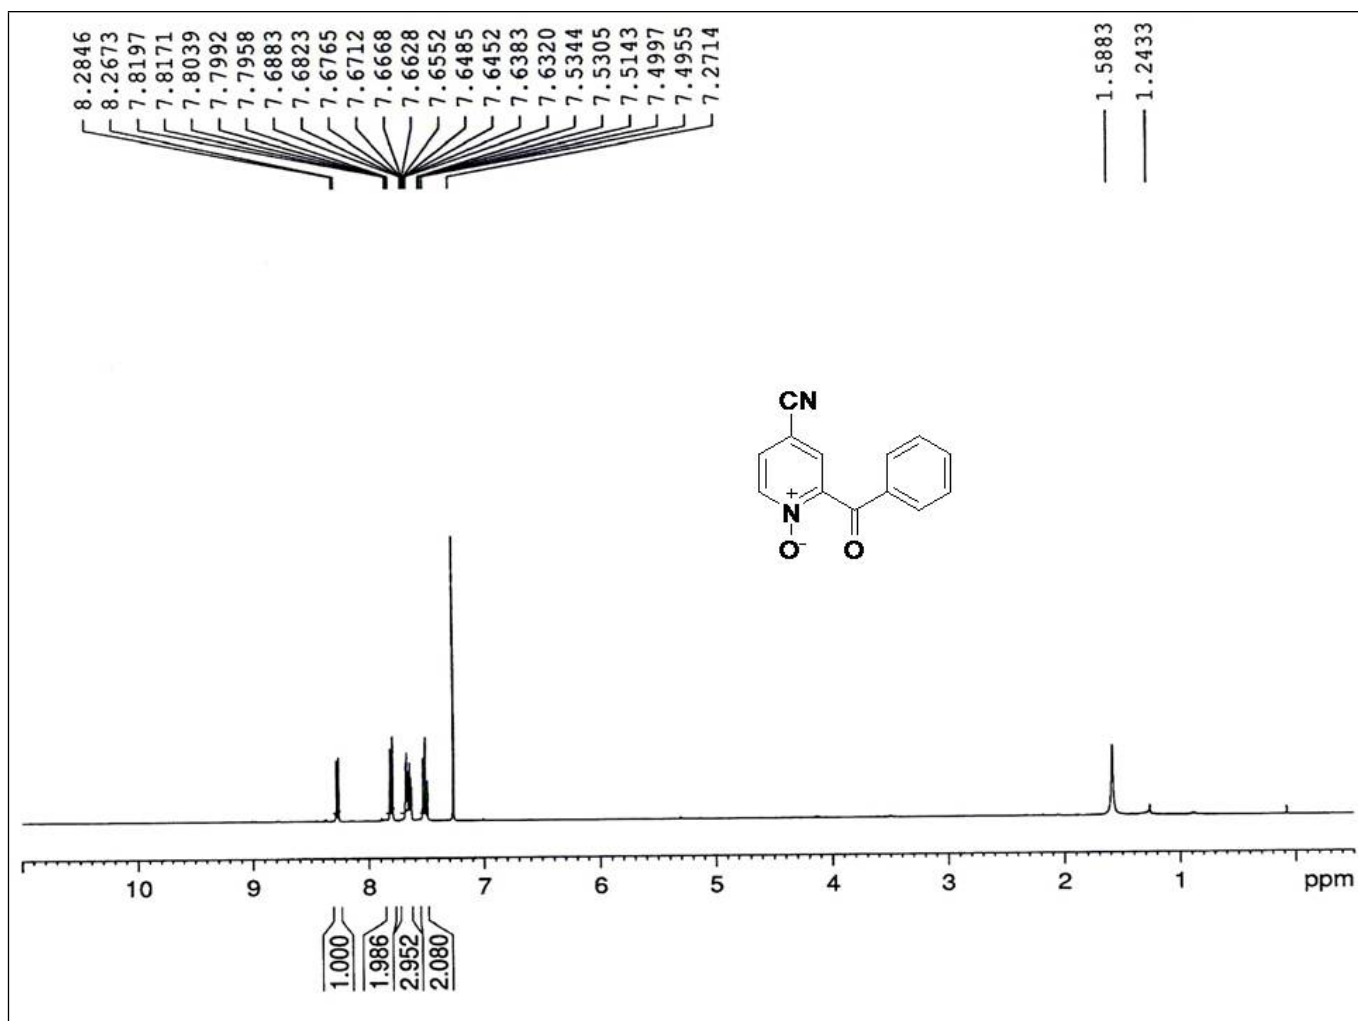

Fig 36. <sup>1</sup>H-NMR spectrum of **3m**

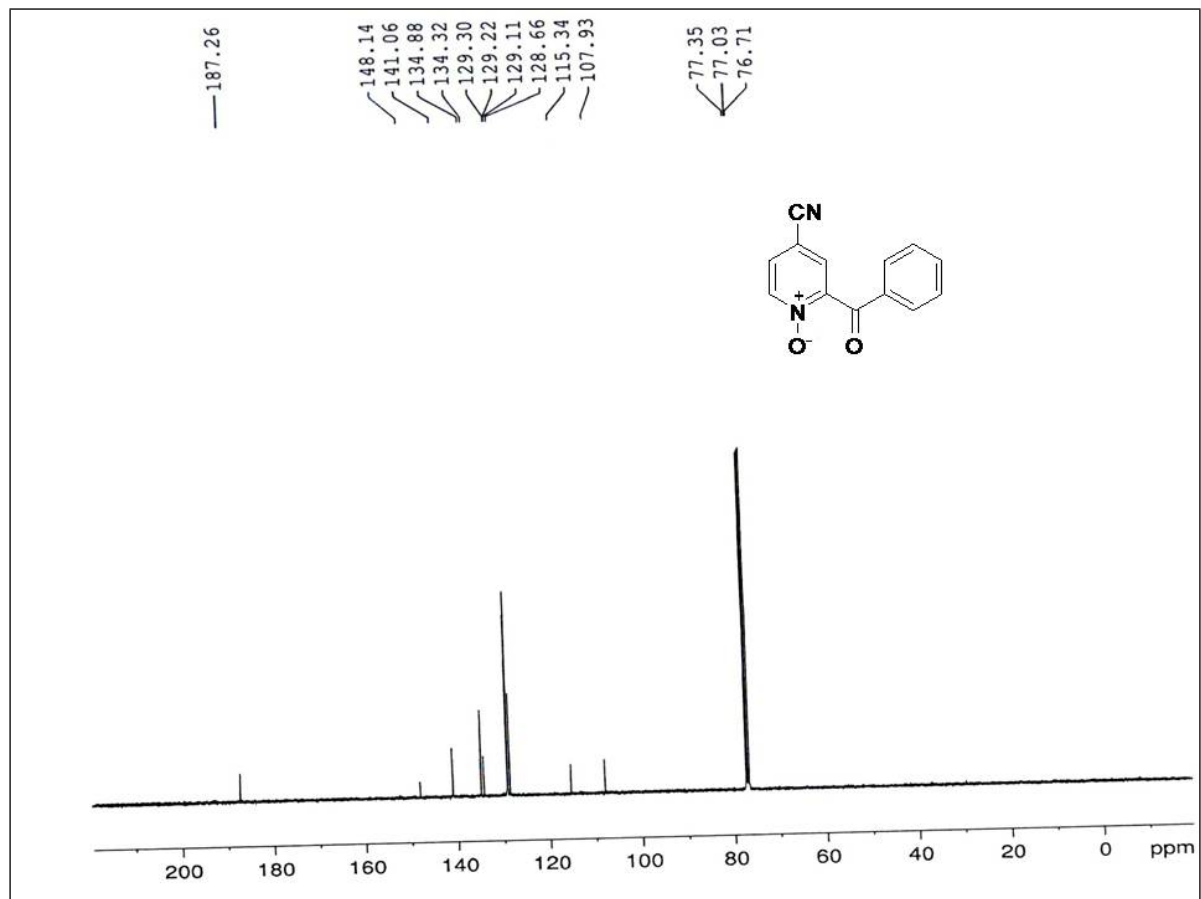

Fig 37. <sup>13</sup>C-NMR spectrum of **3m**

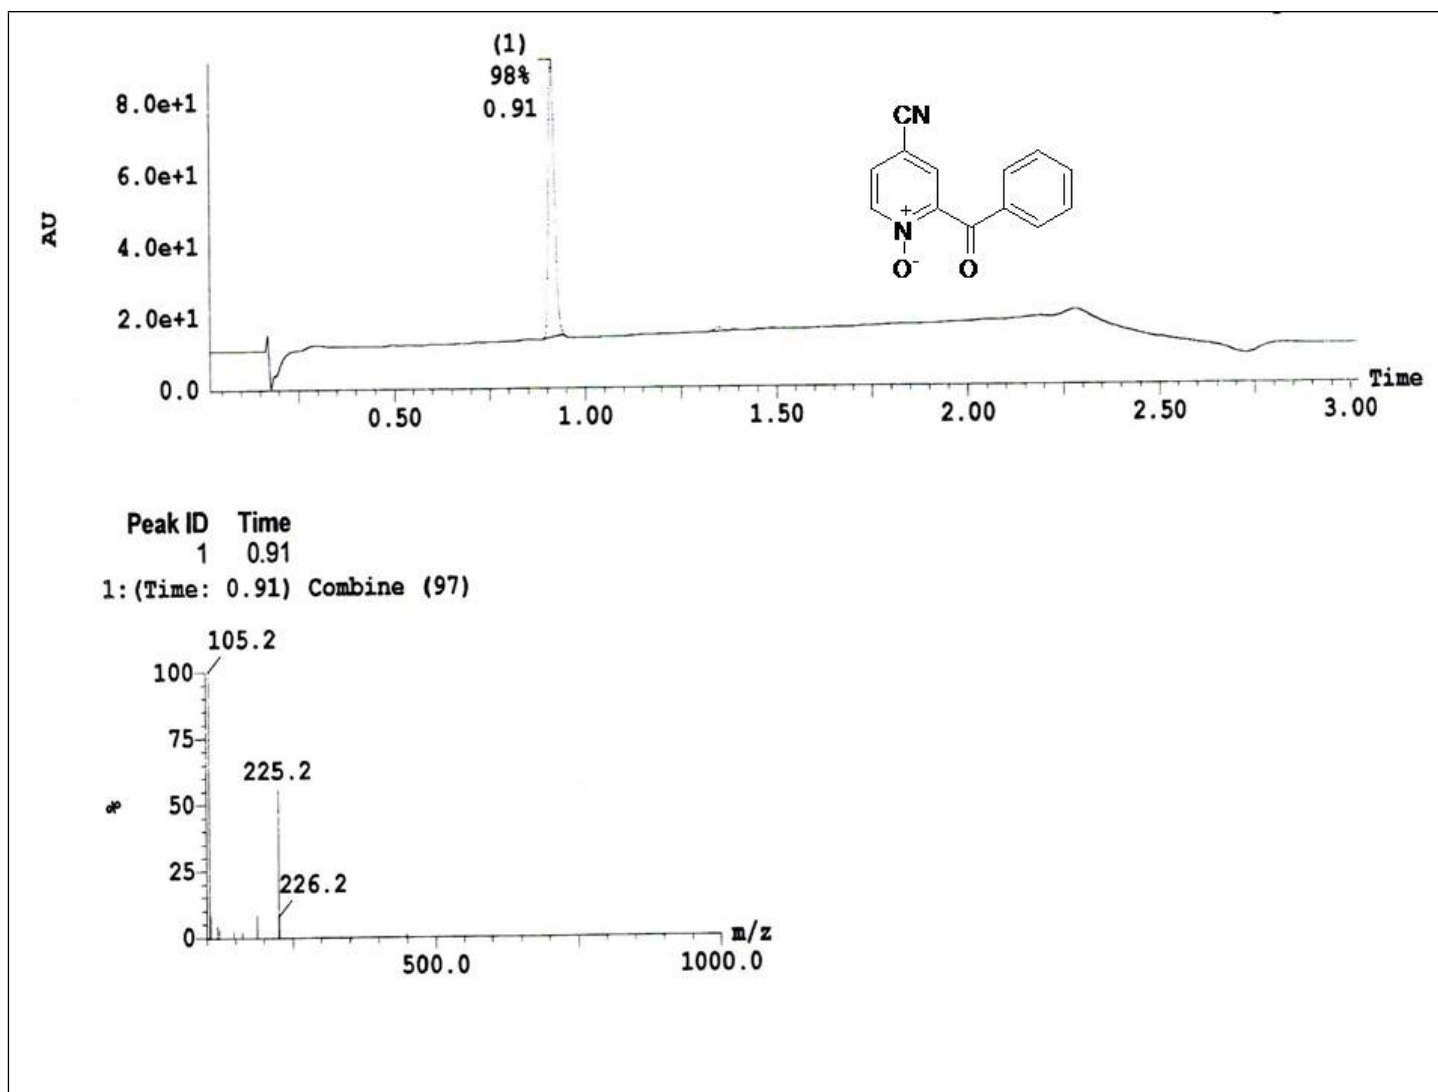

Fig 38. Mass spectrum of **3m**

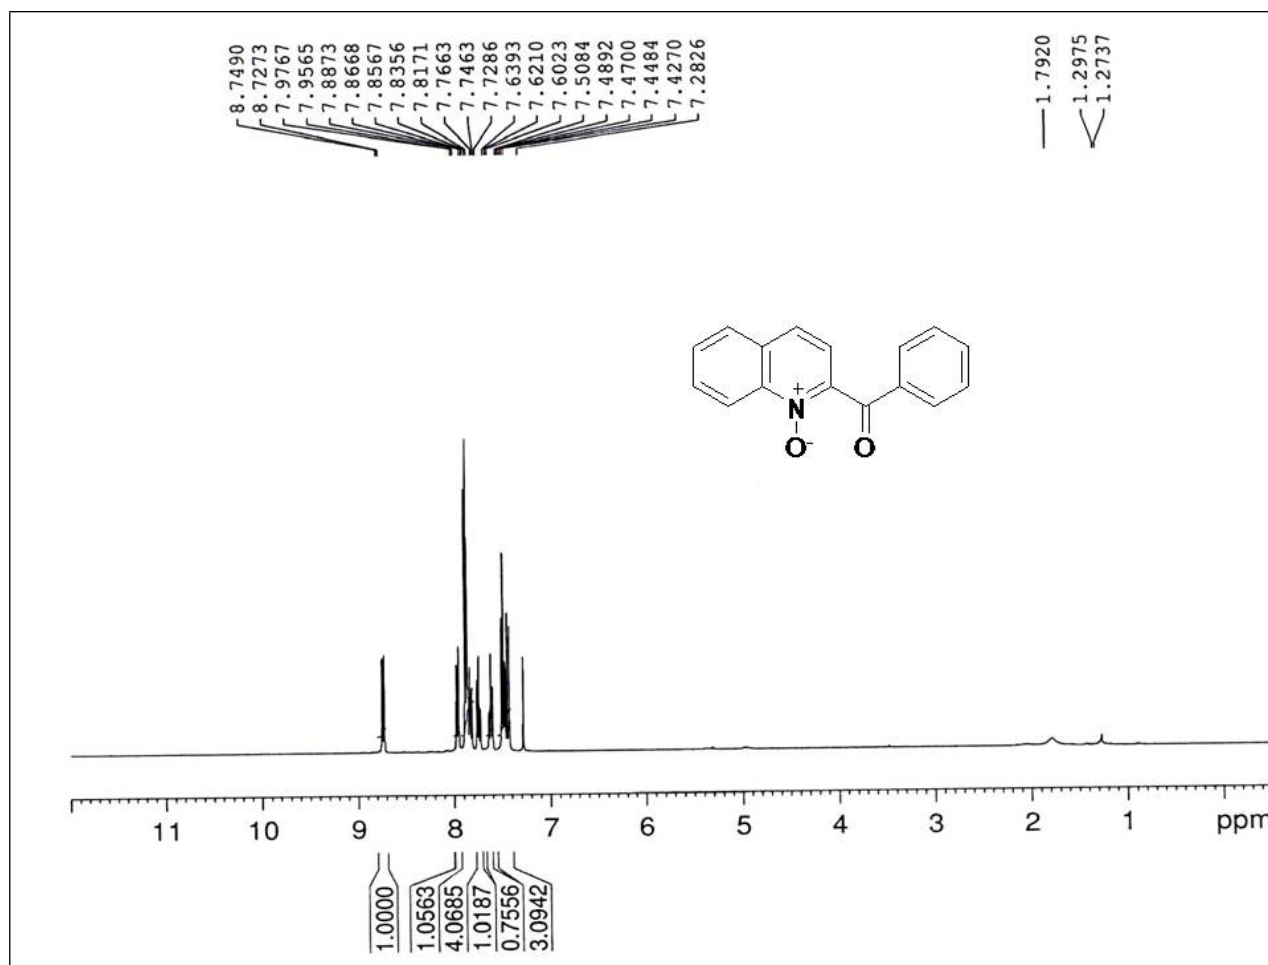

Fig 39. <sup>1</sup>H-NMR spectrum of **3n**

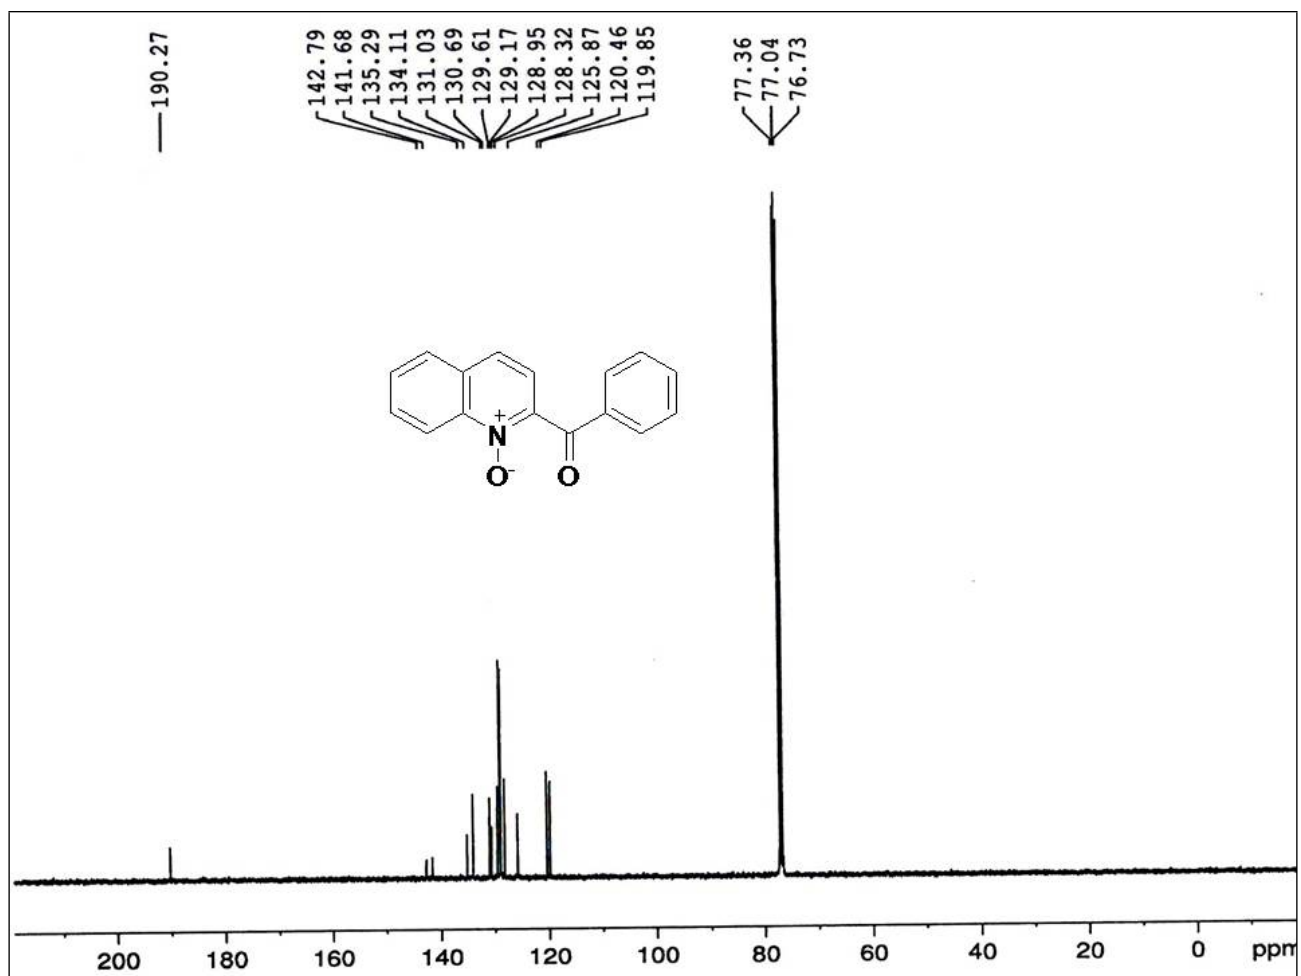

Fig 40.  $^{13}\text{C}$ -NMR spectrum of **3n**

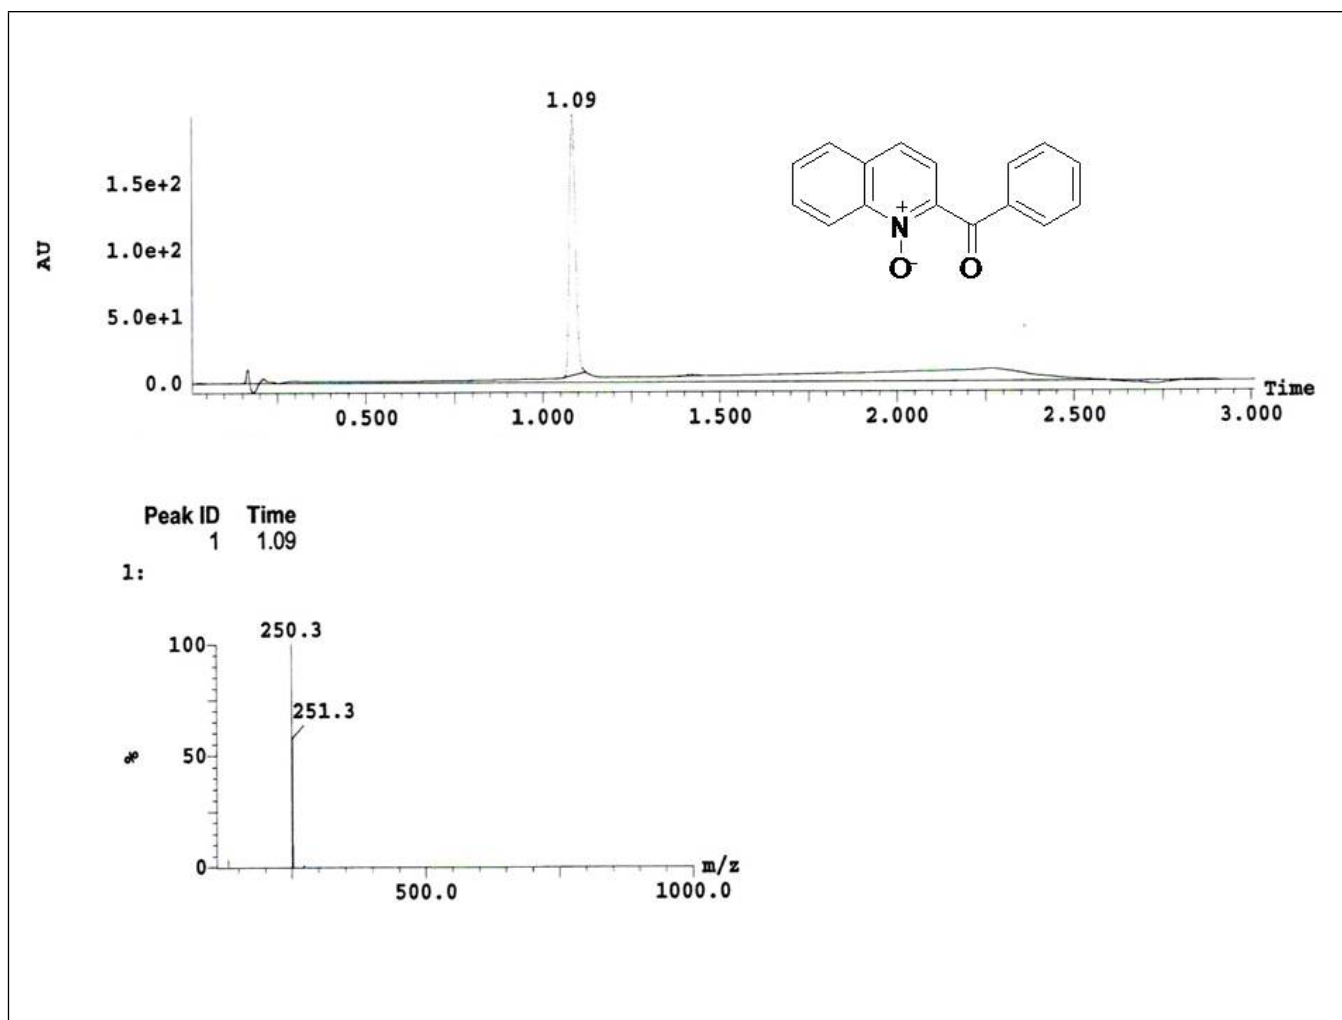

Fig 41. Mass spectrum of **3n**

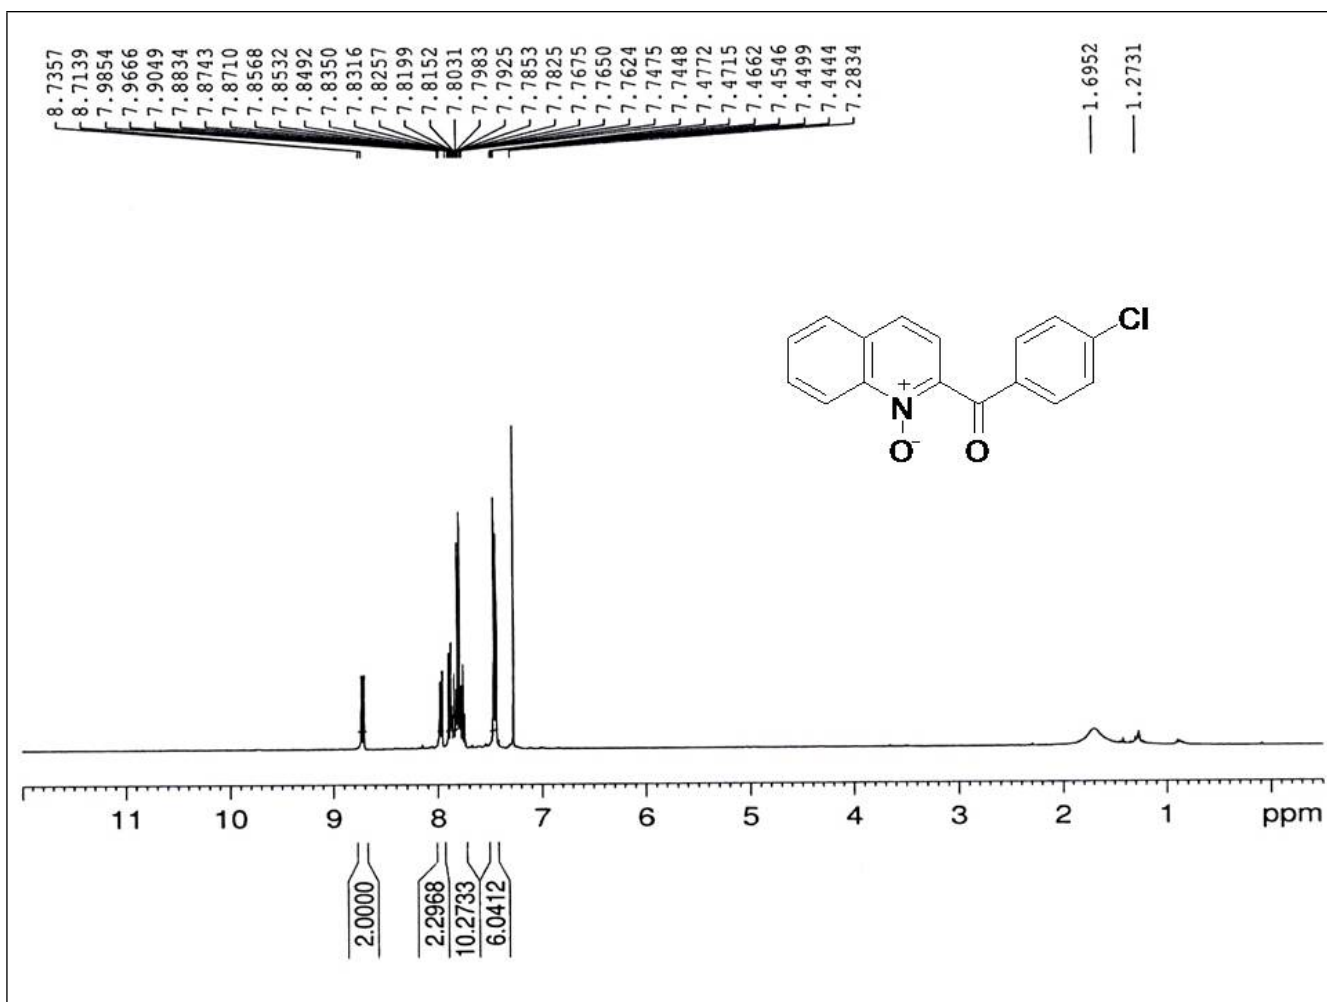

Fig 42. <sup>1</sup>H-NMR spectrum of **3o**



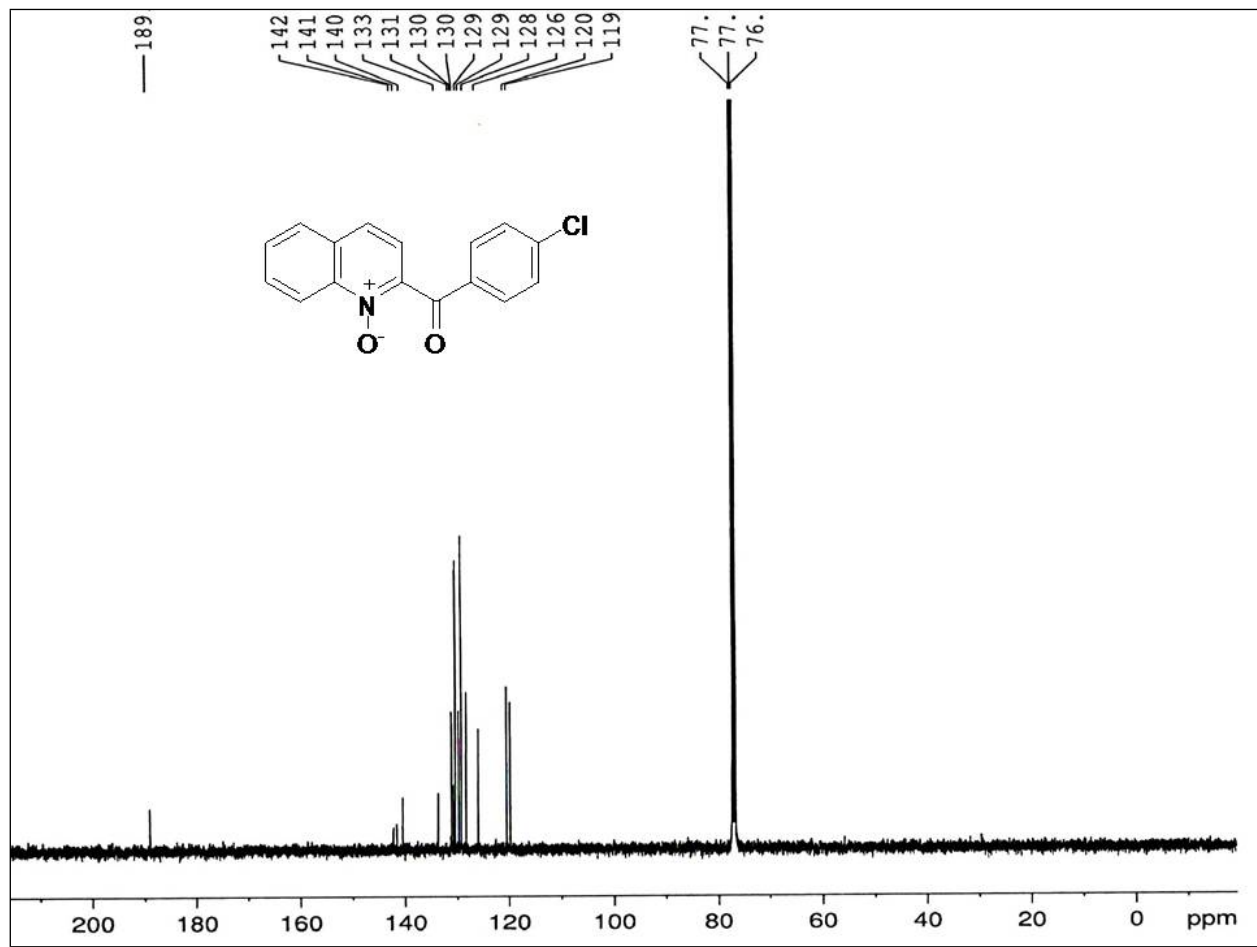

Fig 43.  $^{13}\text{C}$ -NMR spectrum of **30**

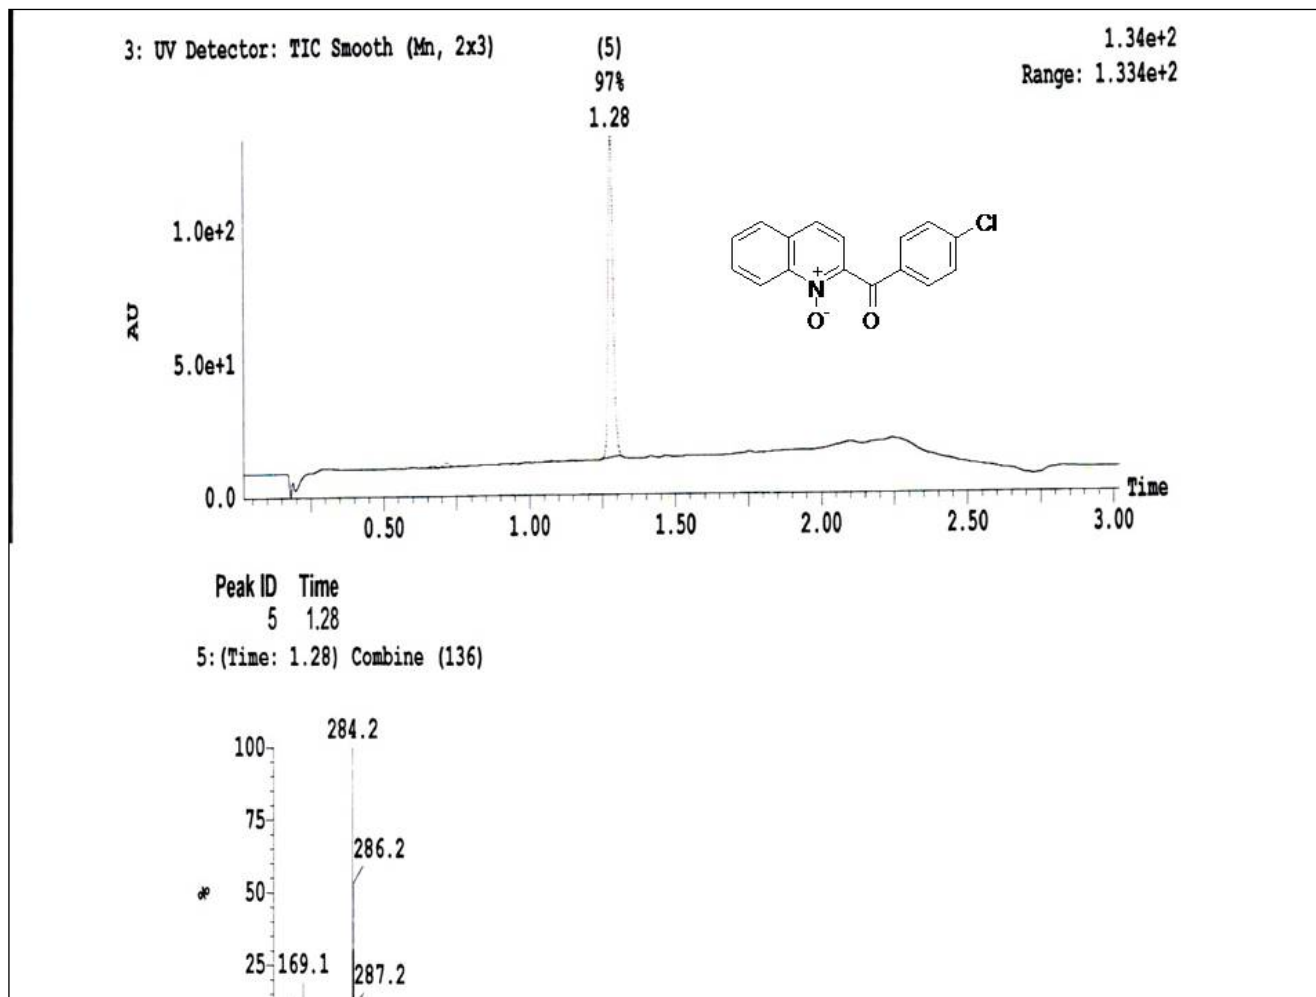

Fig 44. Mass spectrum of **3o**

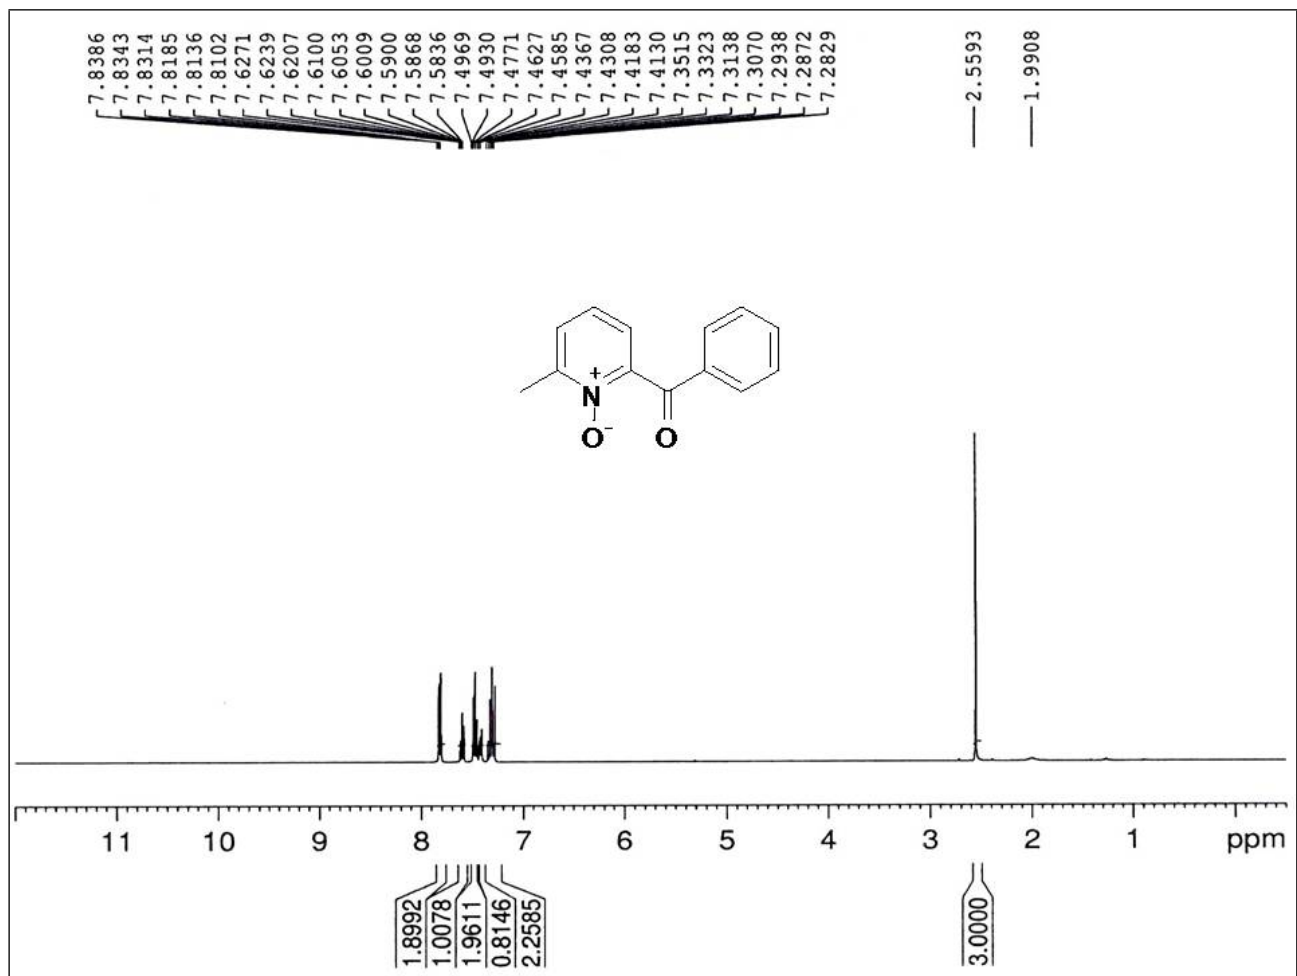

Fig 45. <sup>1</sup>H-NMR spectrum of **3p**

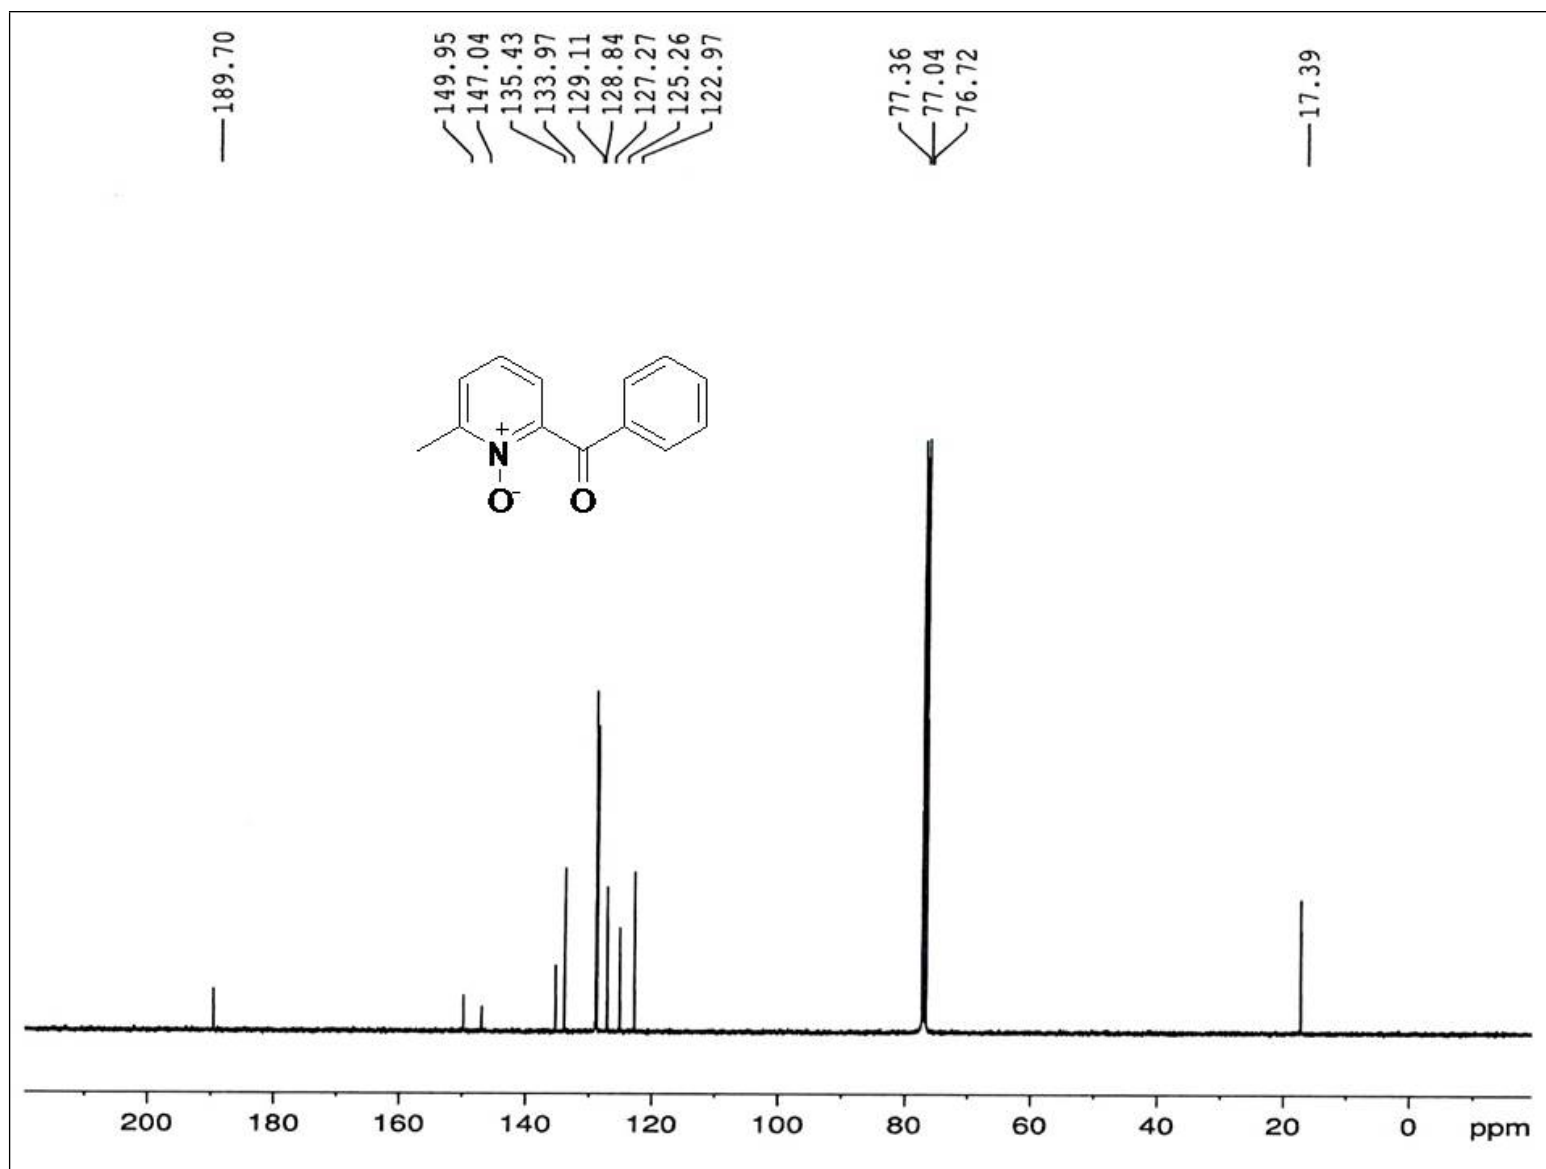

Fig 46.  $^{13}\text{C}$ -NMR spectrum of **3p**

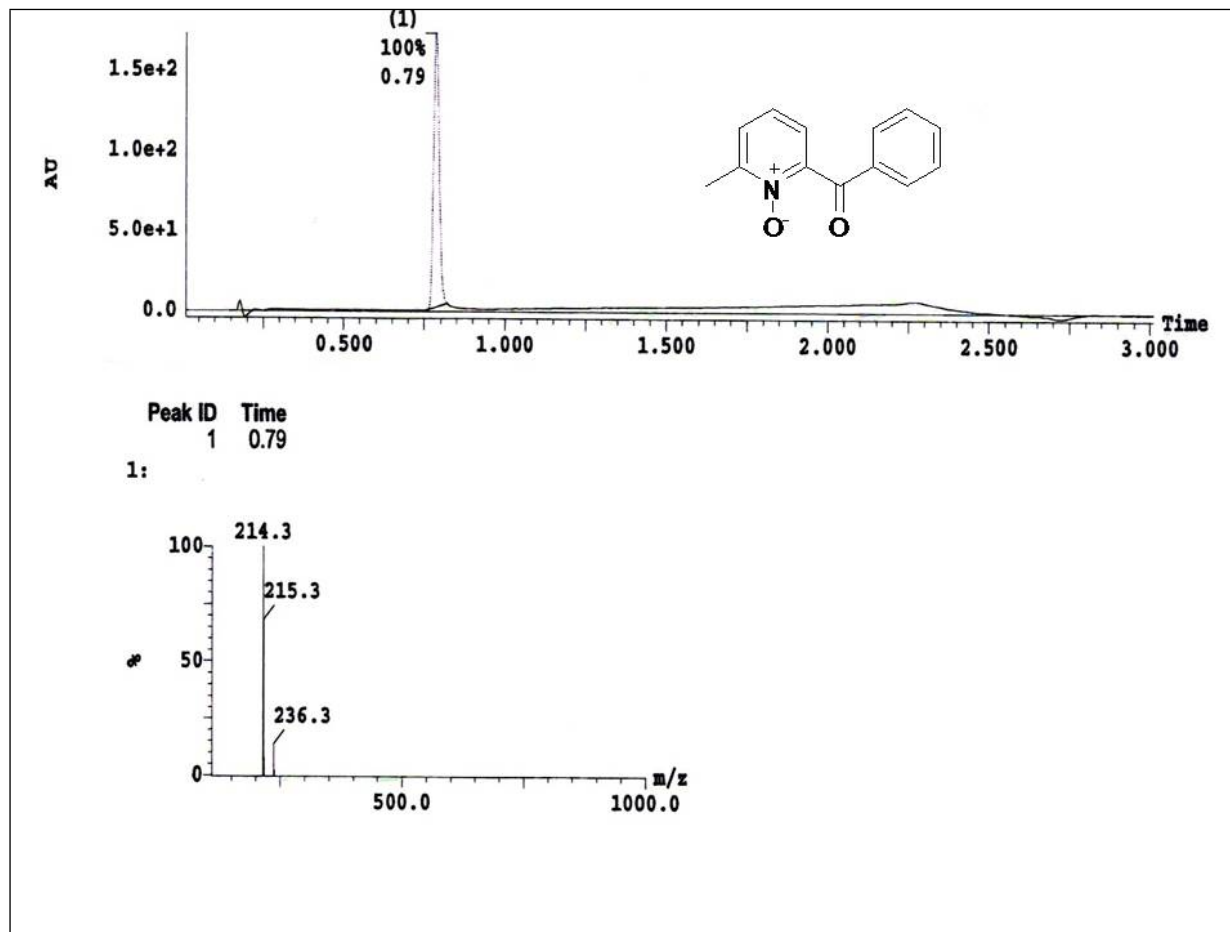

Fig 47. Mass spectrum of **3p**

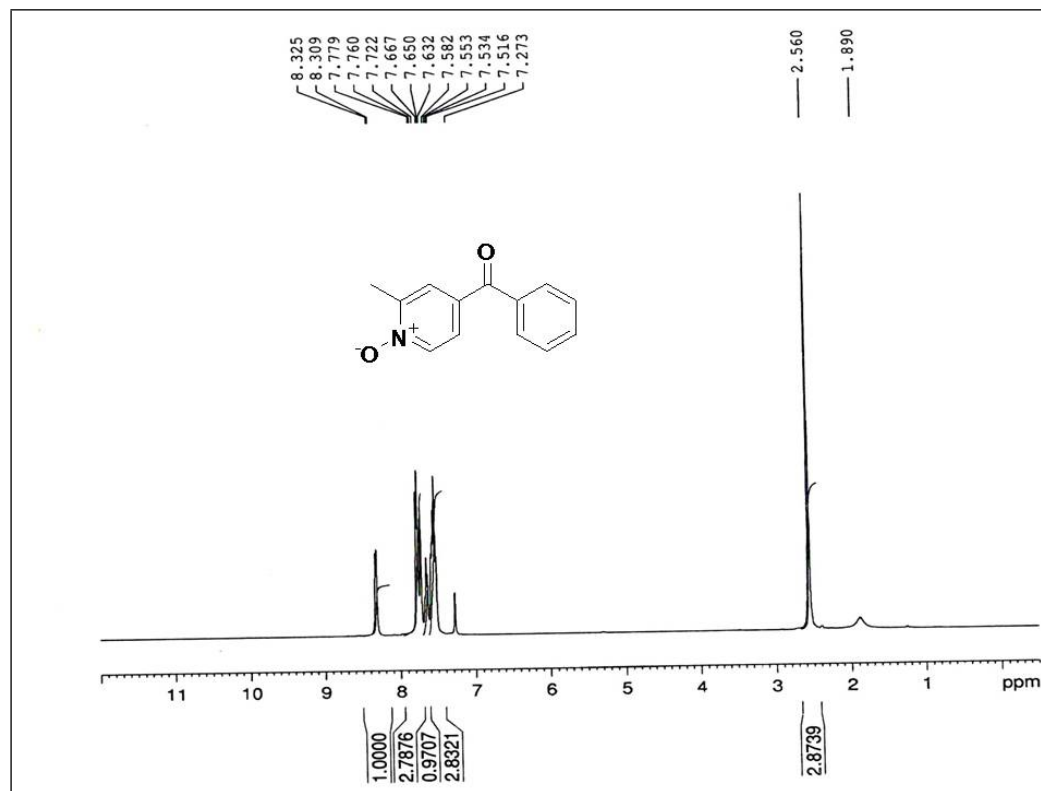

Fig 48. <sup>1</sup>H-NMR spectrum of 3p'

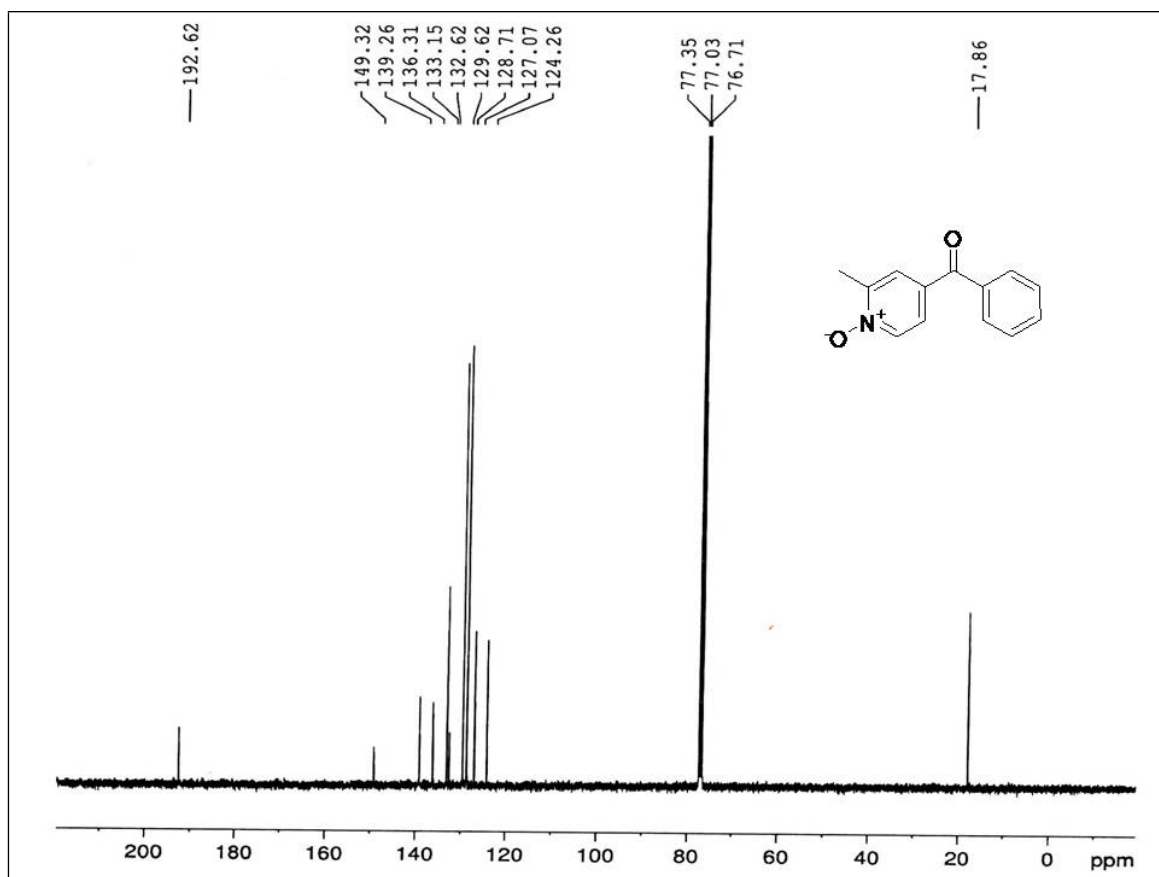

Fig 49.  $^{13}\text{C}$ -NMR spectrum of **3p'**

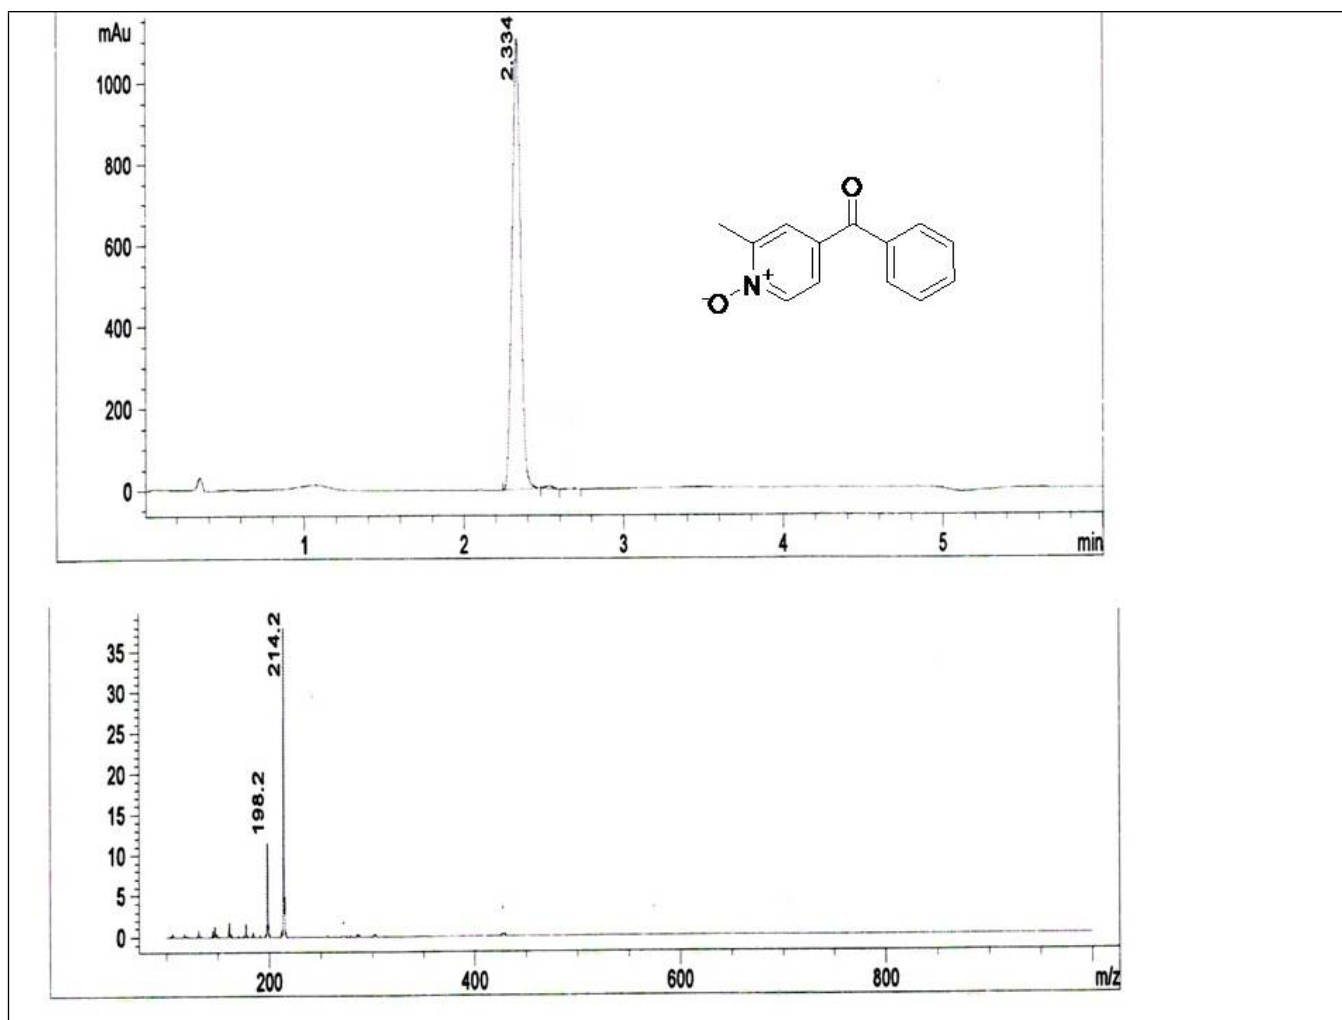

Fig 50. Mass spectrum of **3p'**



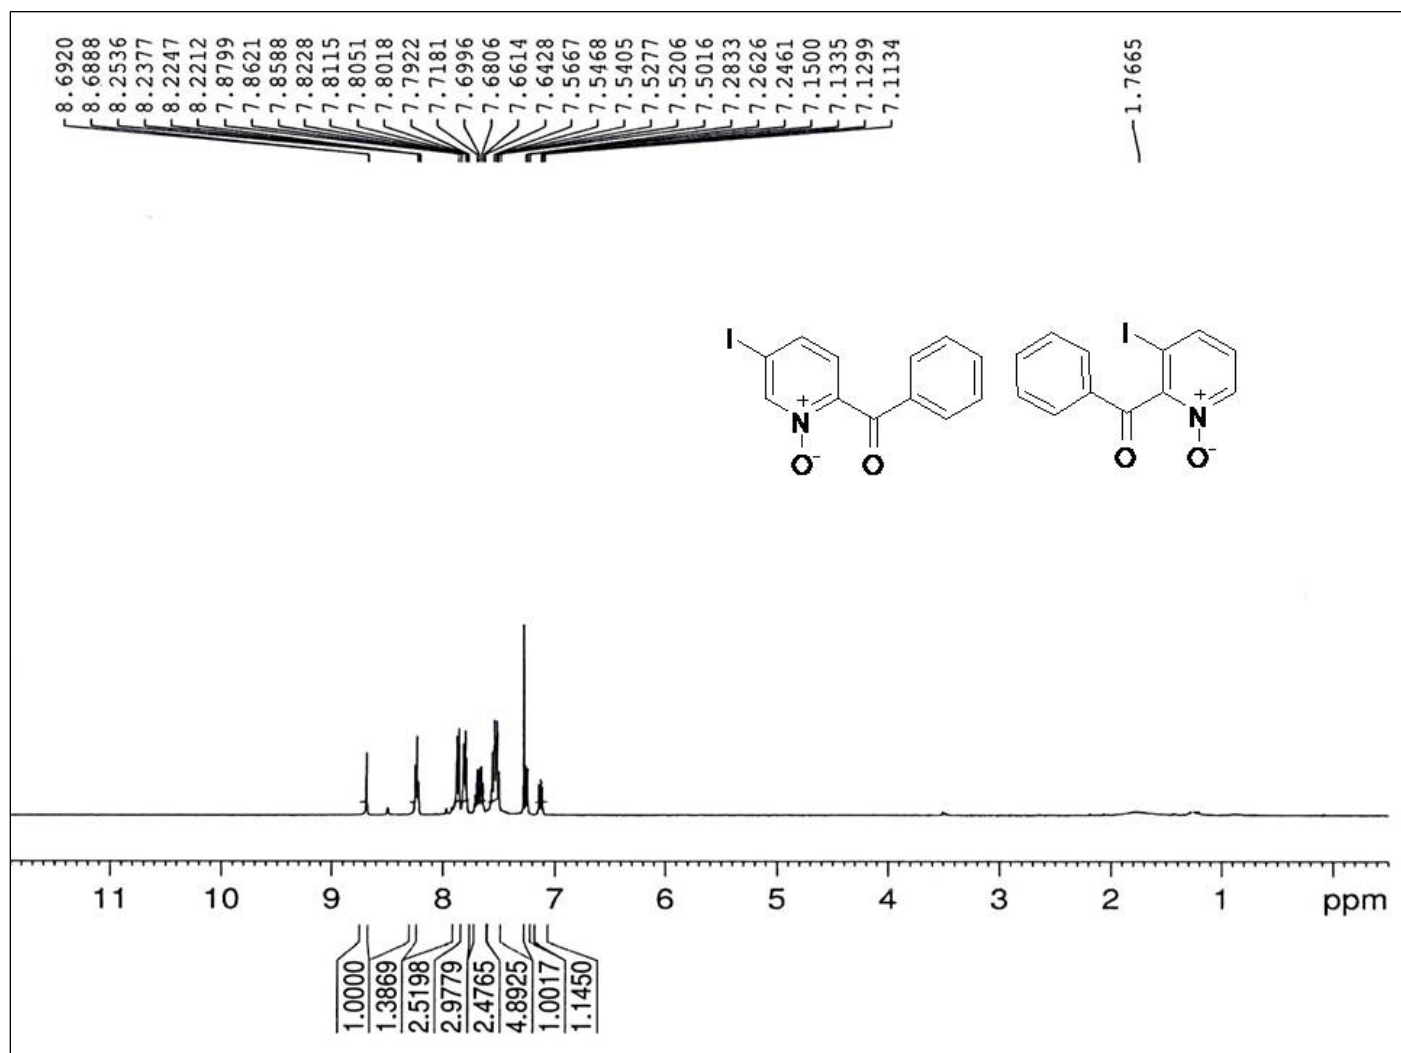

Fig 51.  $^1\text{H-NMR}$  spectrum of **3q** & **3q'**

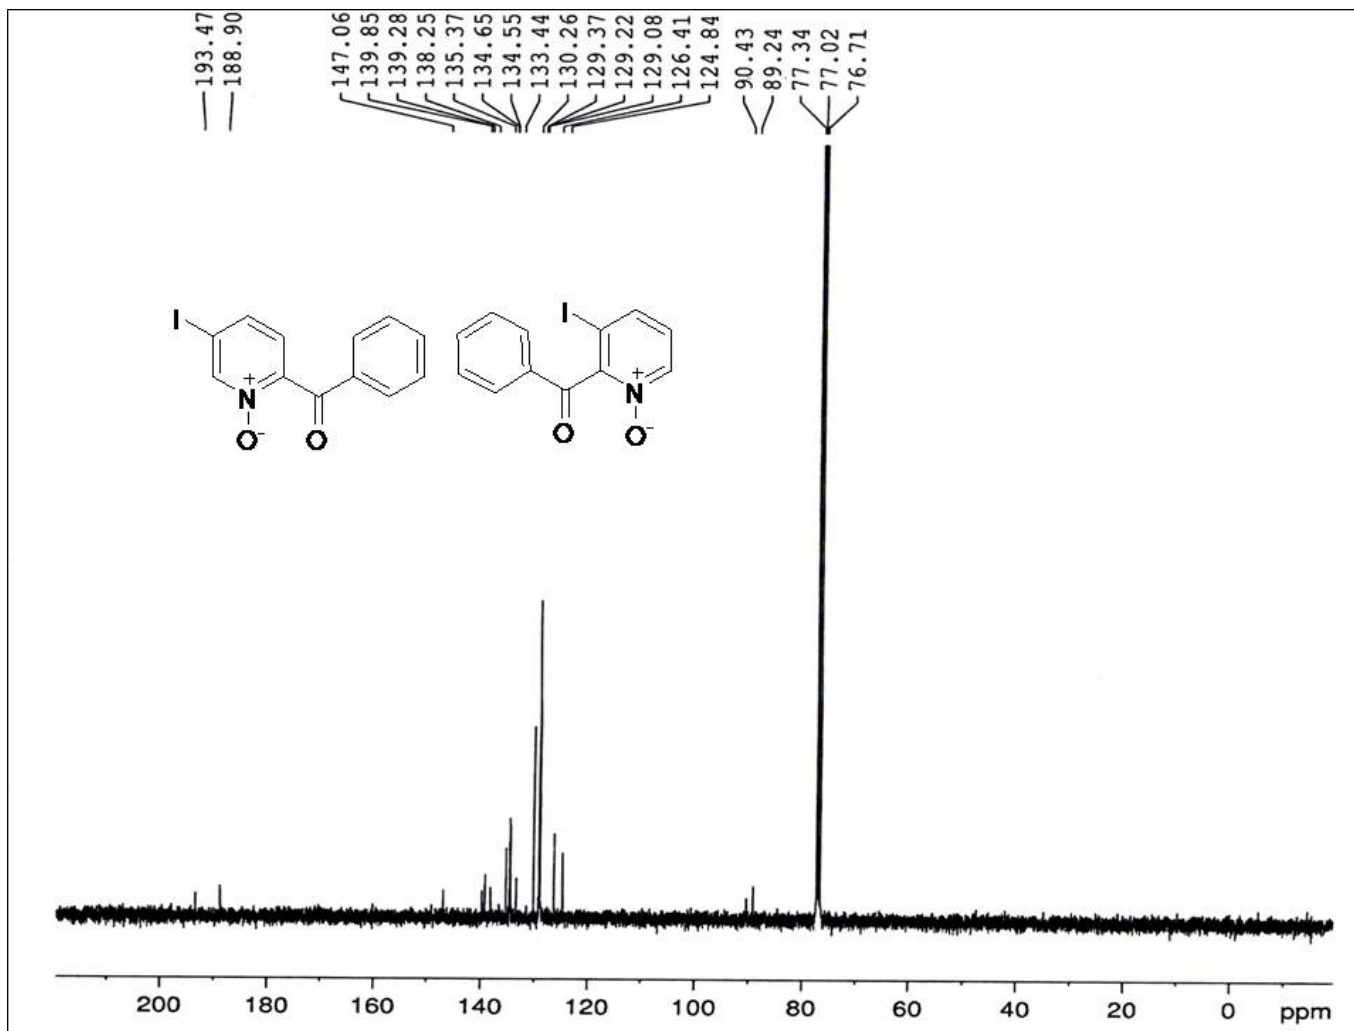

Fig 52.  $^{13}\text{C}$ -NMR spectrum of **3q** & **3q'**

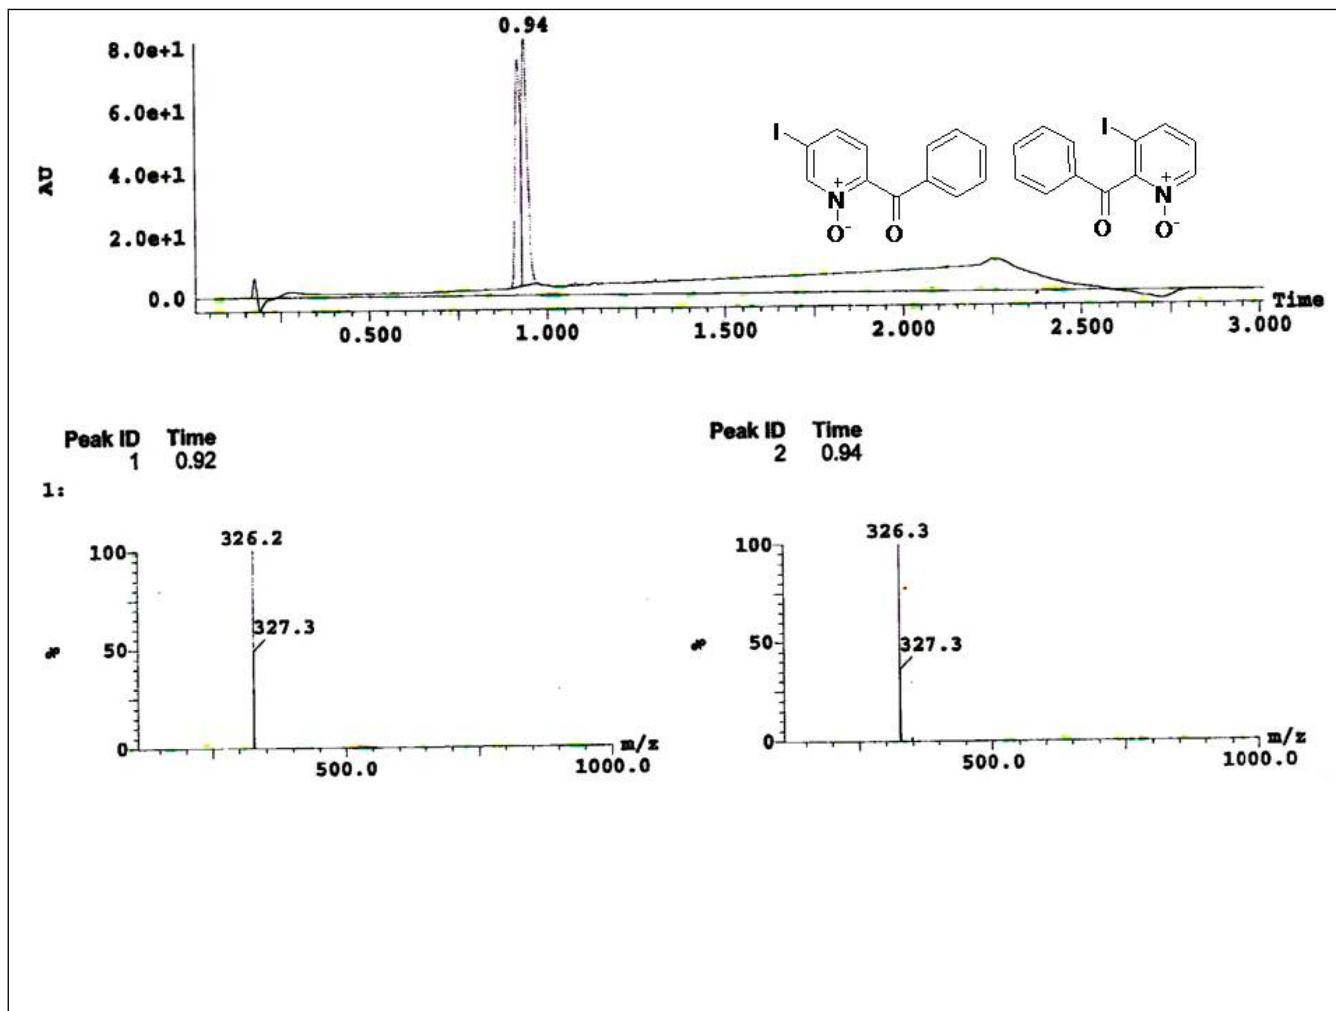

Fig 53. Mass spectrum of 3q & 3q'

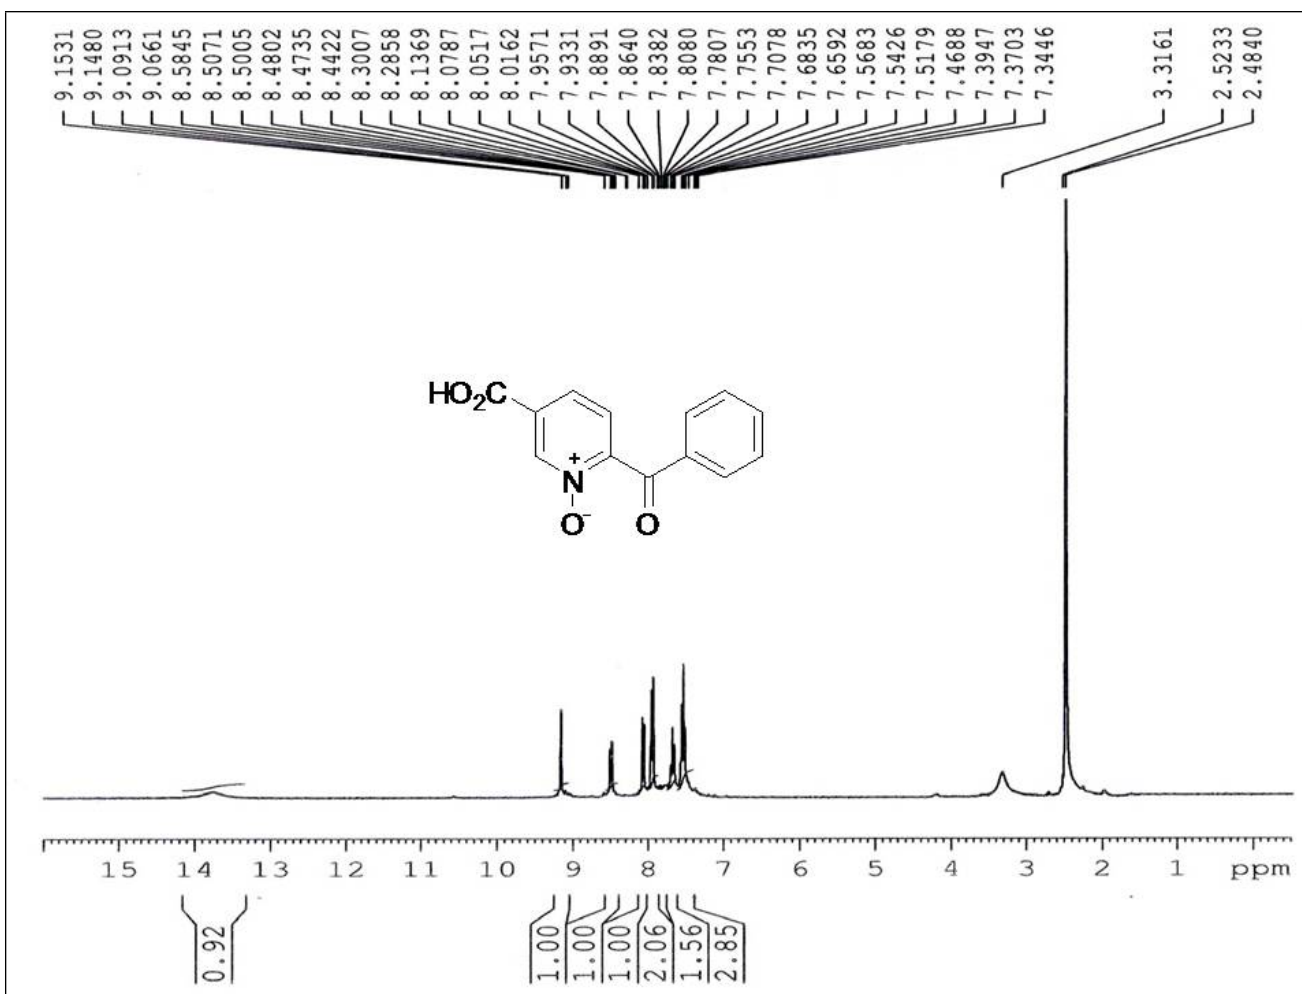

Fig 54.  $^1\text{H-NMR}$  spectrum of **3r**

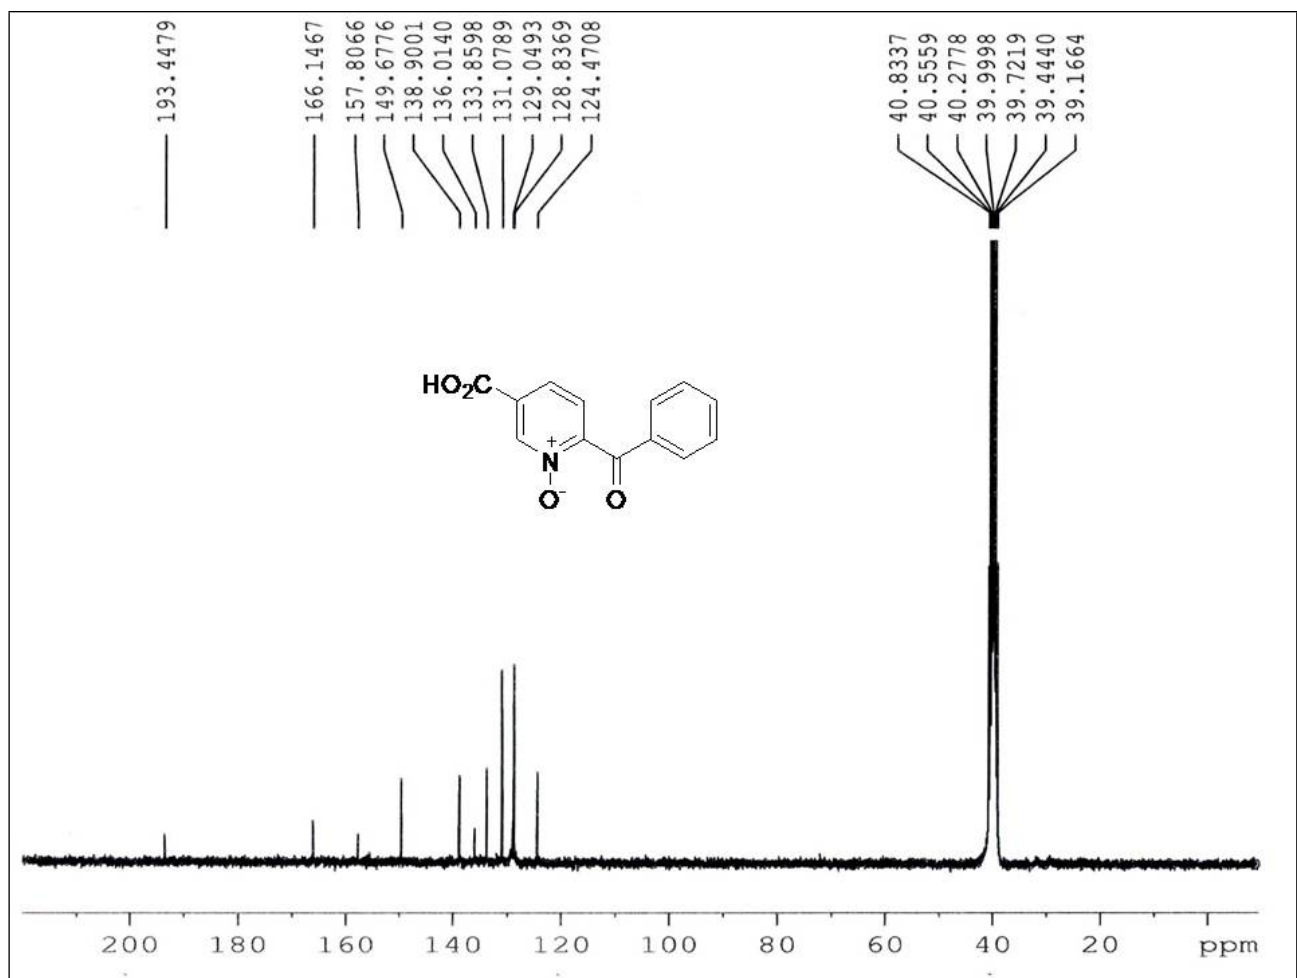

Fig 55. <sup>13</sup>C-NMR spectrum of **3r**

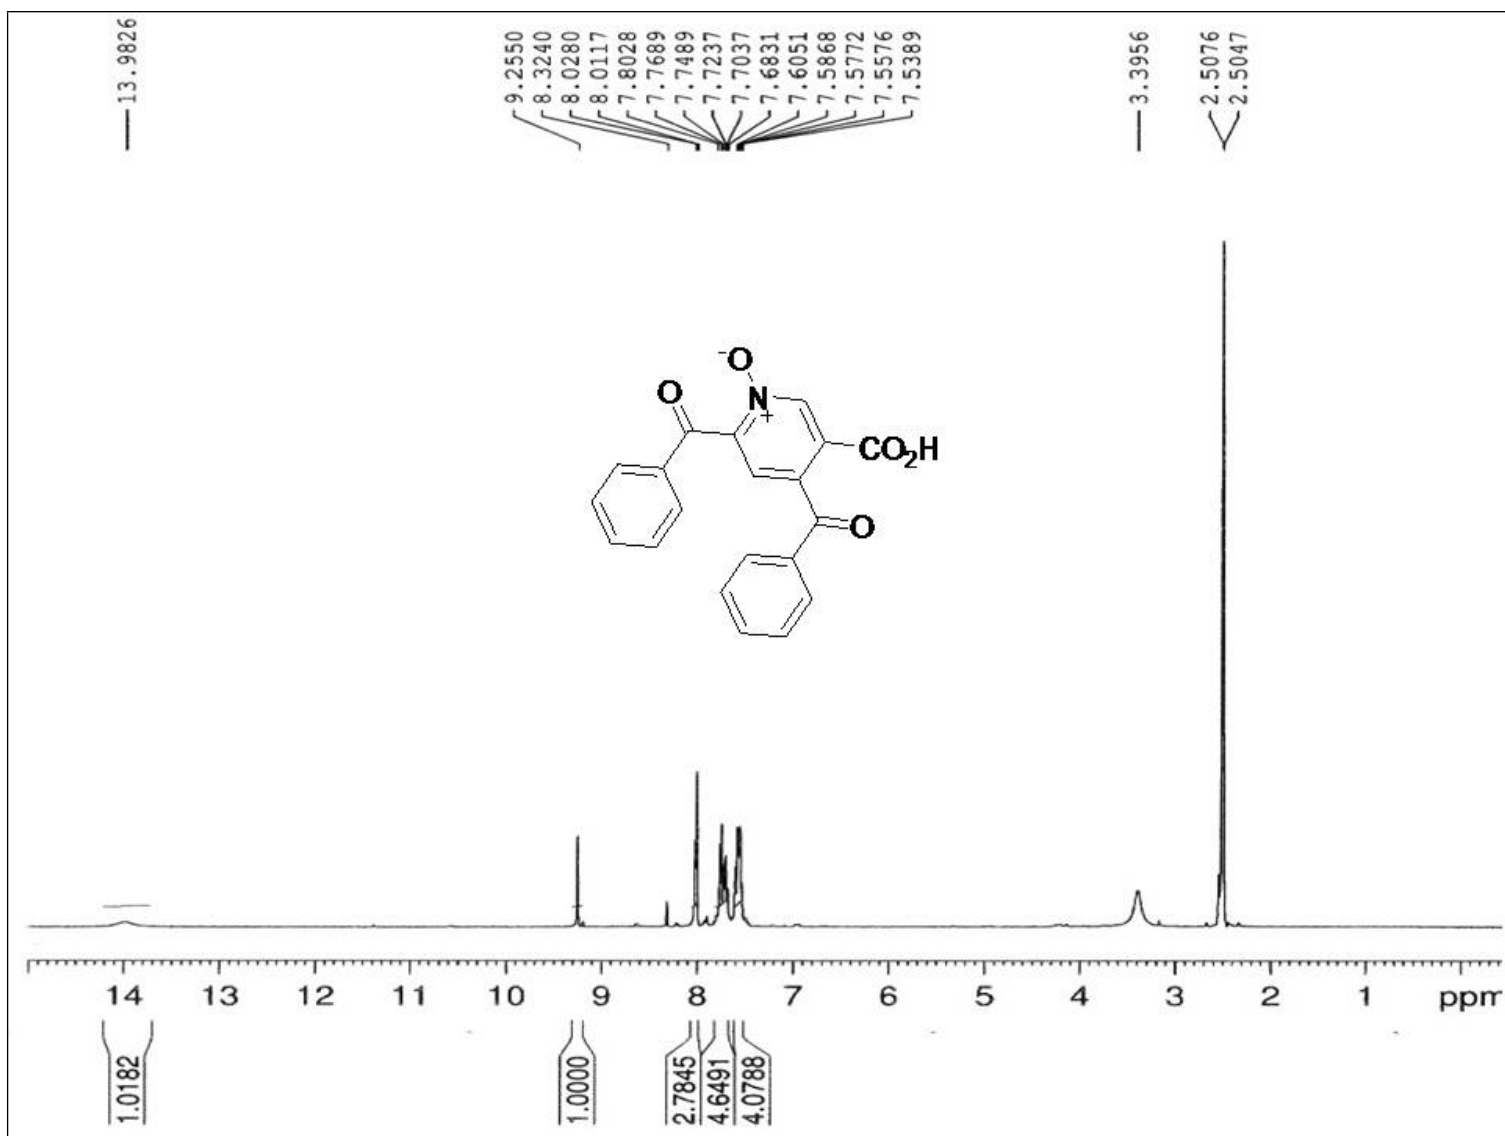

Fig 56. <sup>1</sup>H-NMR spectrum of **3r**

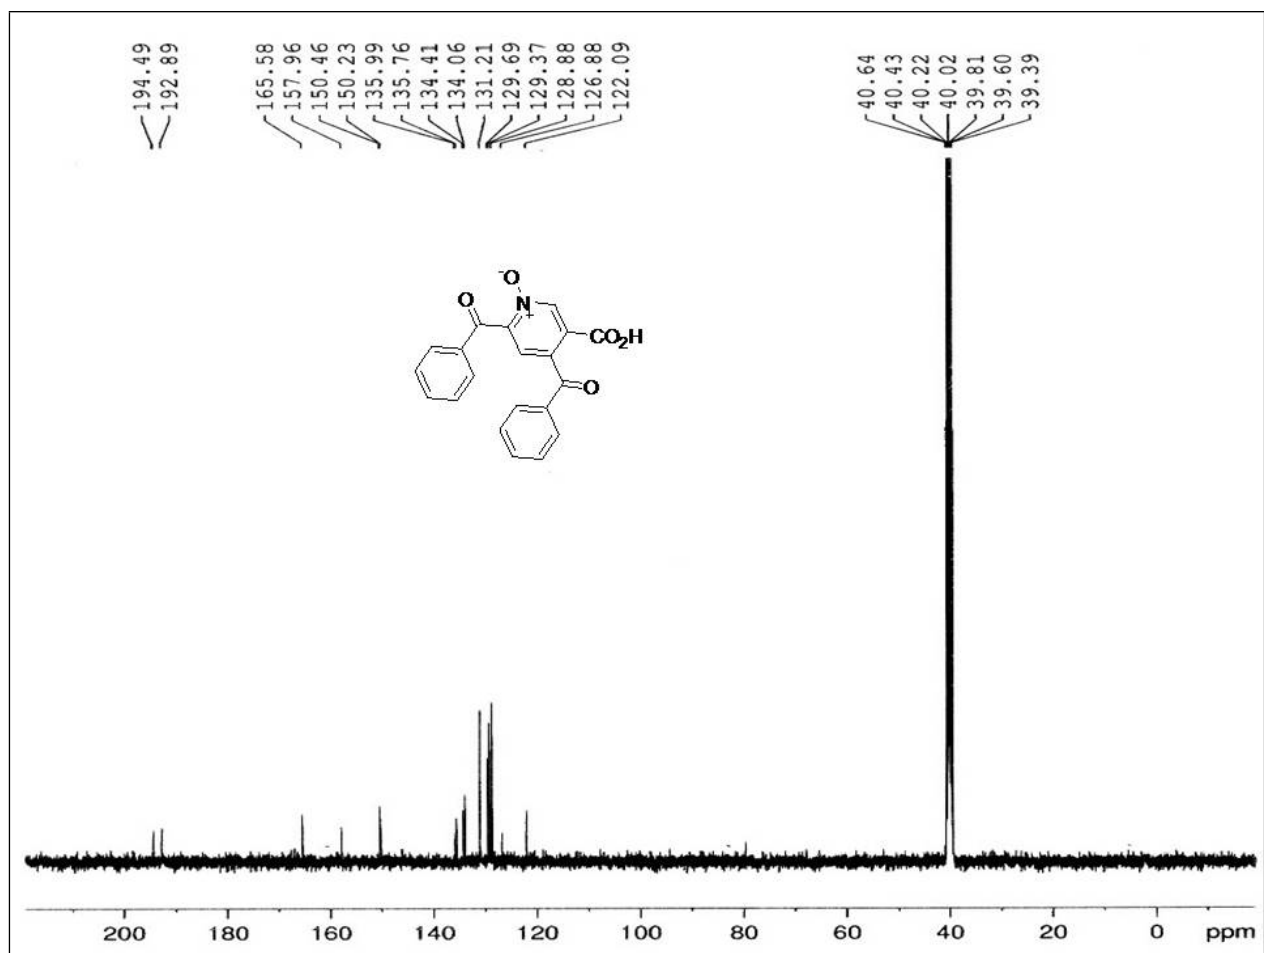

Fig 57. <sup>13</sup>C-NMR spectrum of 3r'

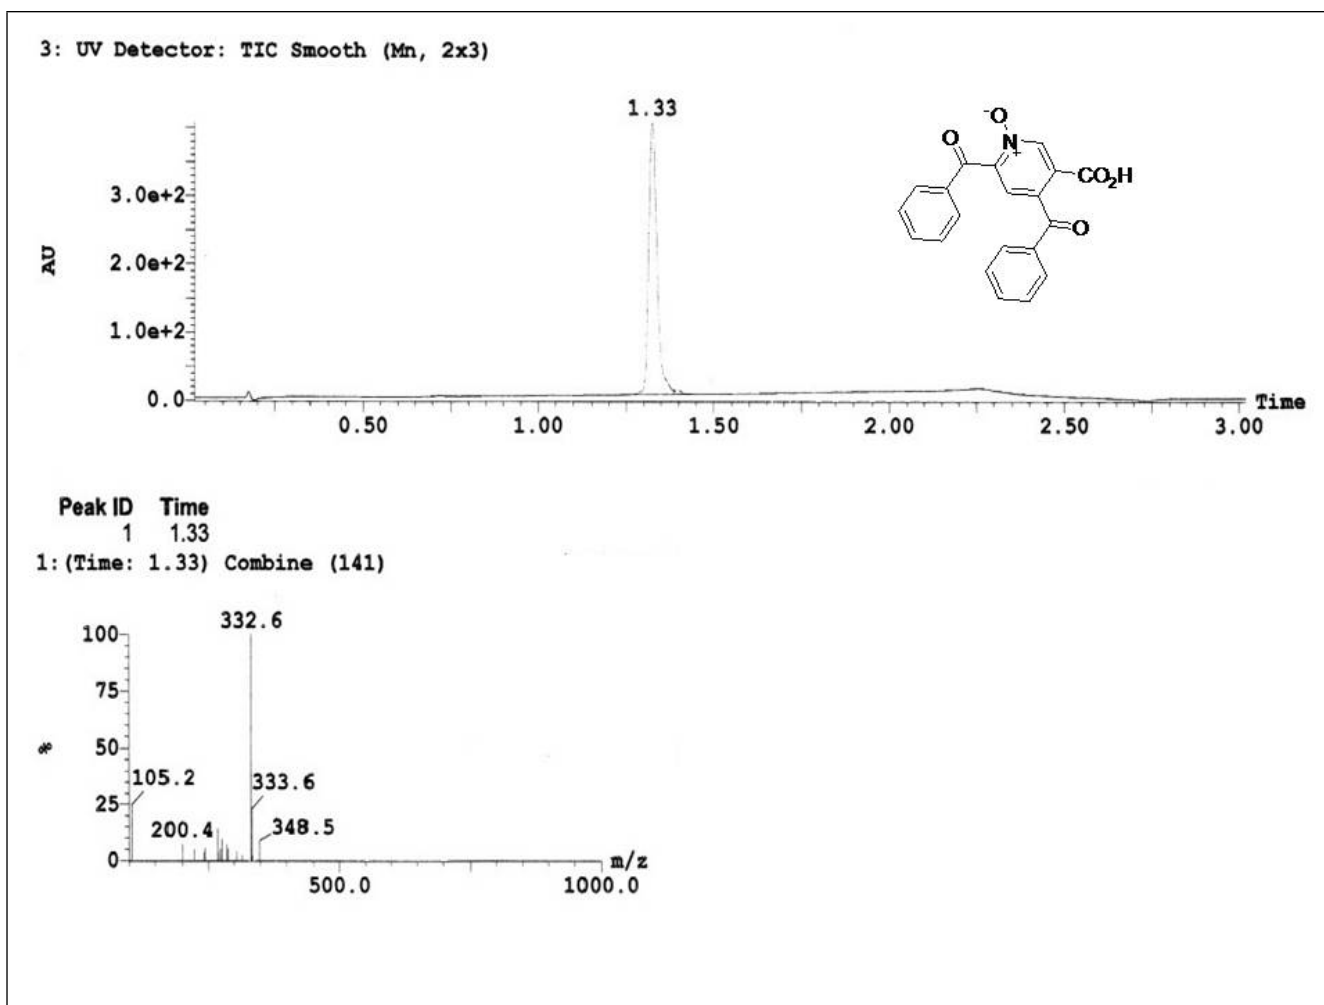

Fig 58. Mass spectrum of **3r'**



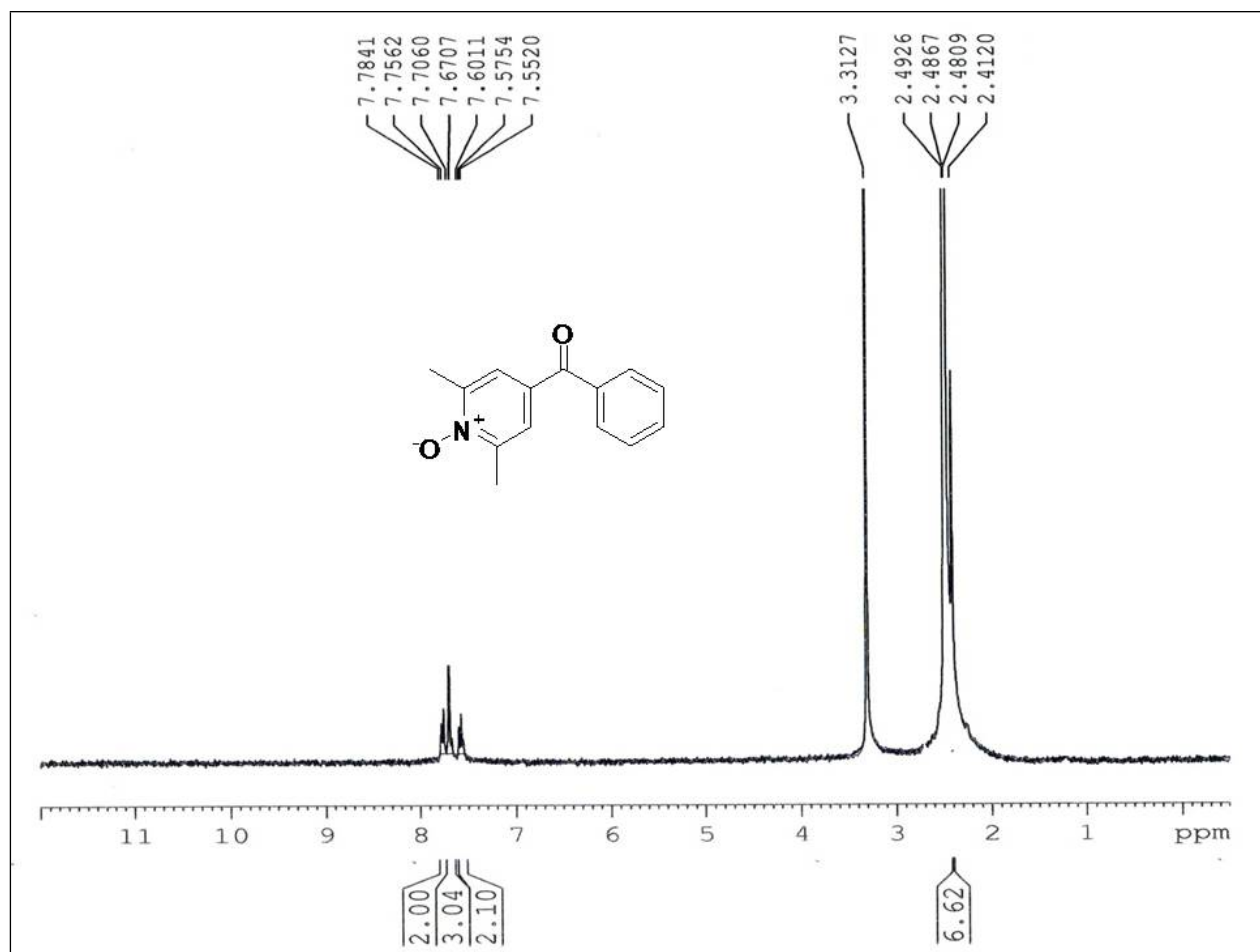

Fig 59. <sup>1</sup>H-NMR spectrum of **3s**

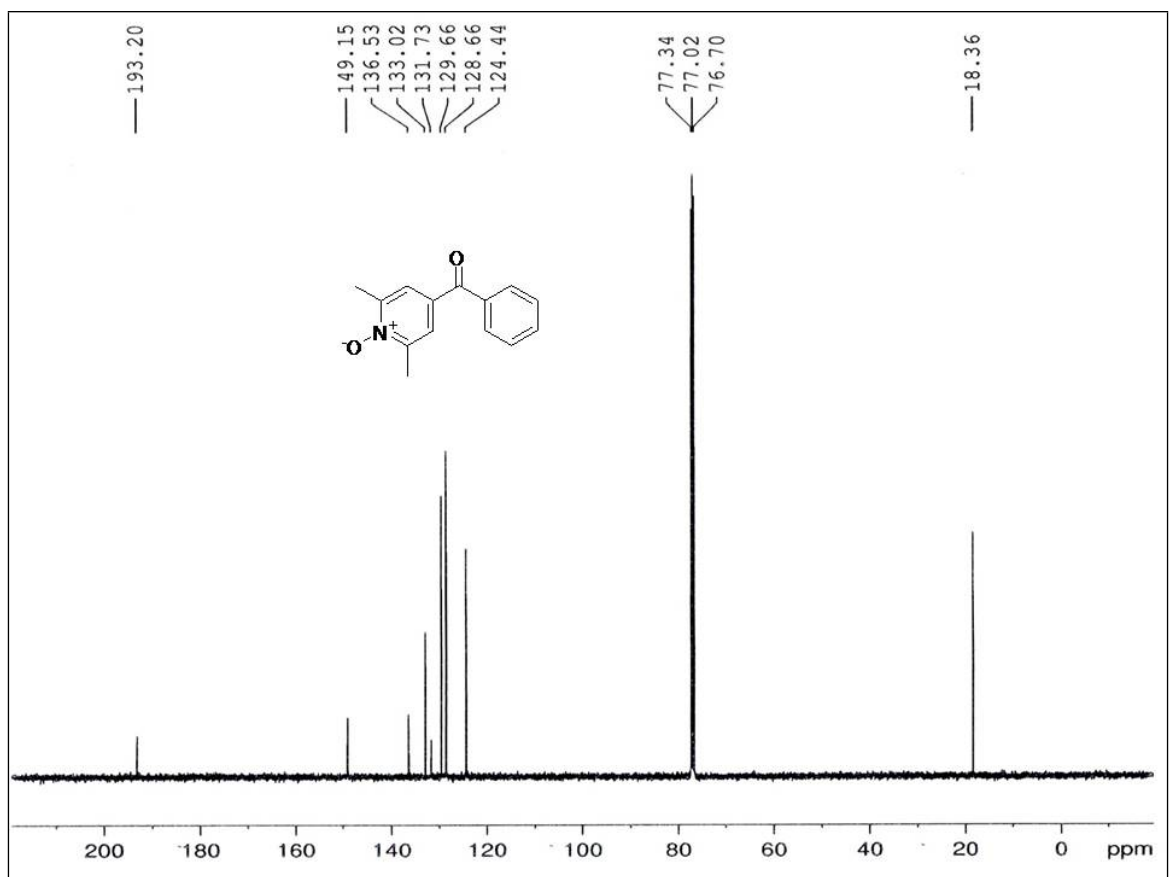

Fig 60.  $^{13}\text{C}$ -NMR spectrum of **3s**

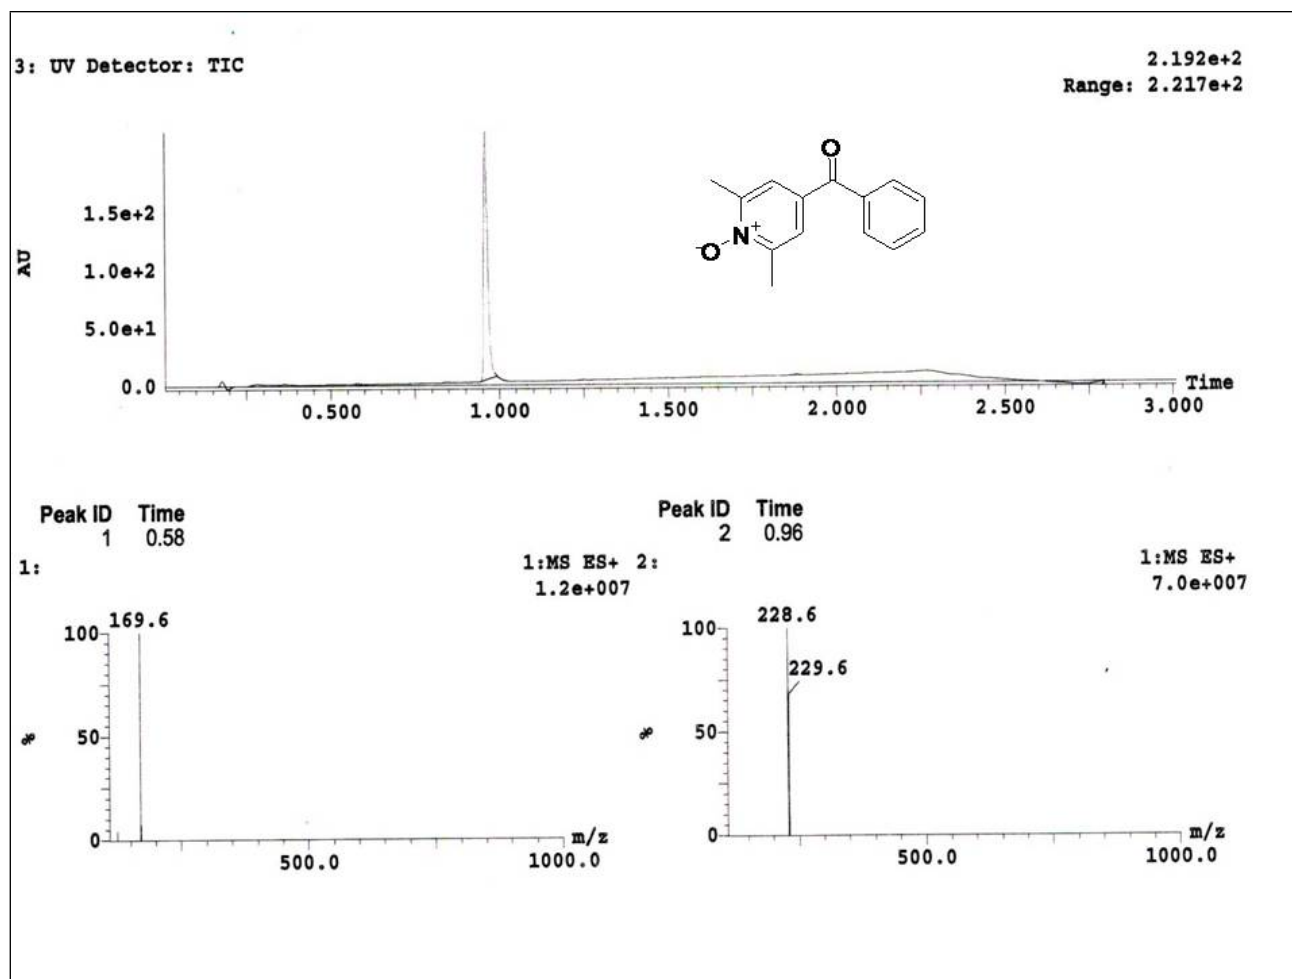

Fig 61. Mass spectrum of 3s

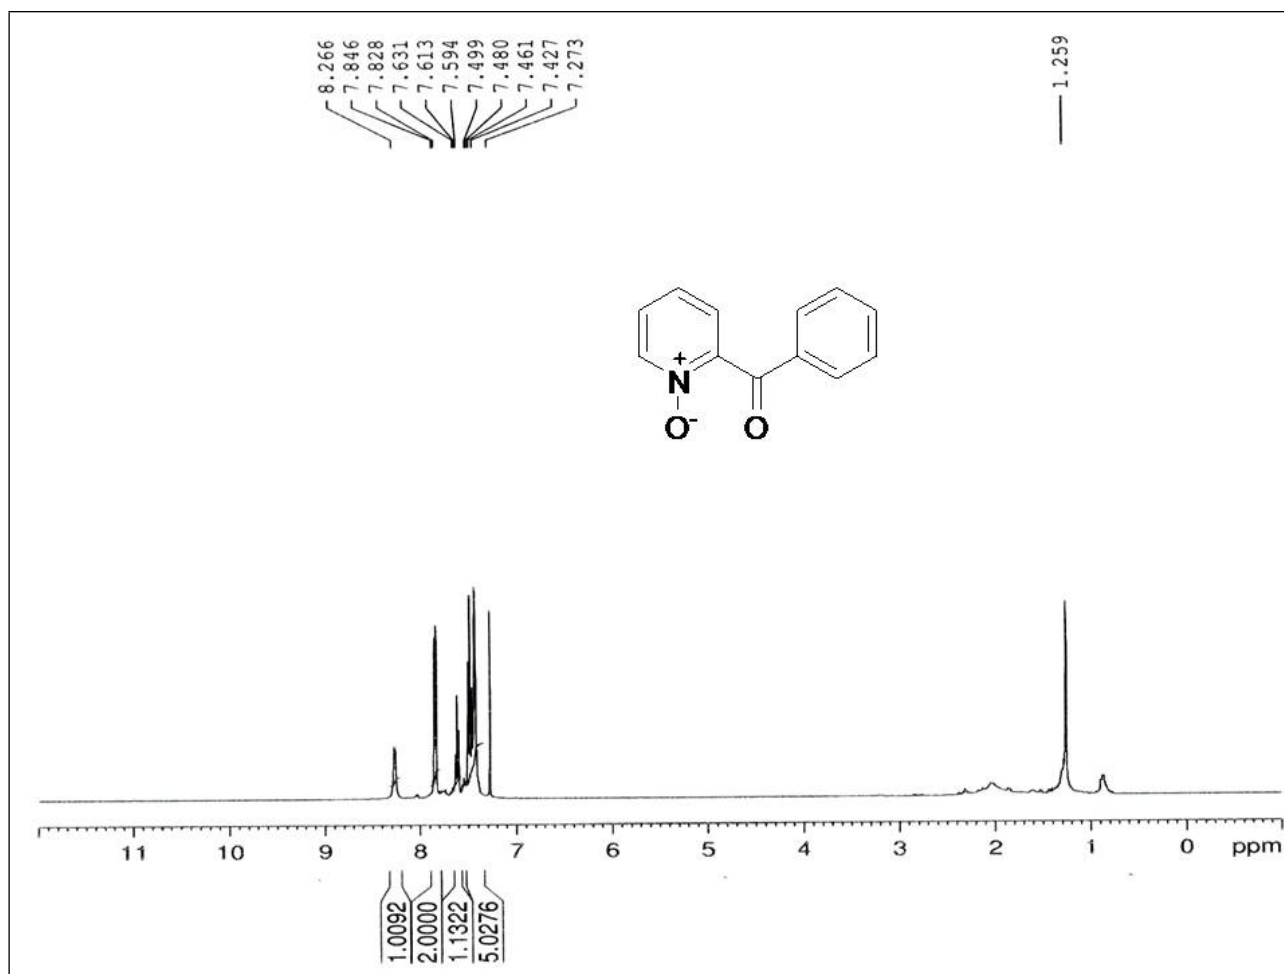

Fig 62. <sup>1</sup>H-NMR spectrum of **3t**

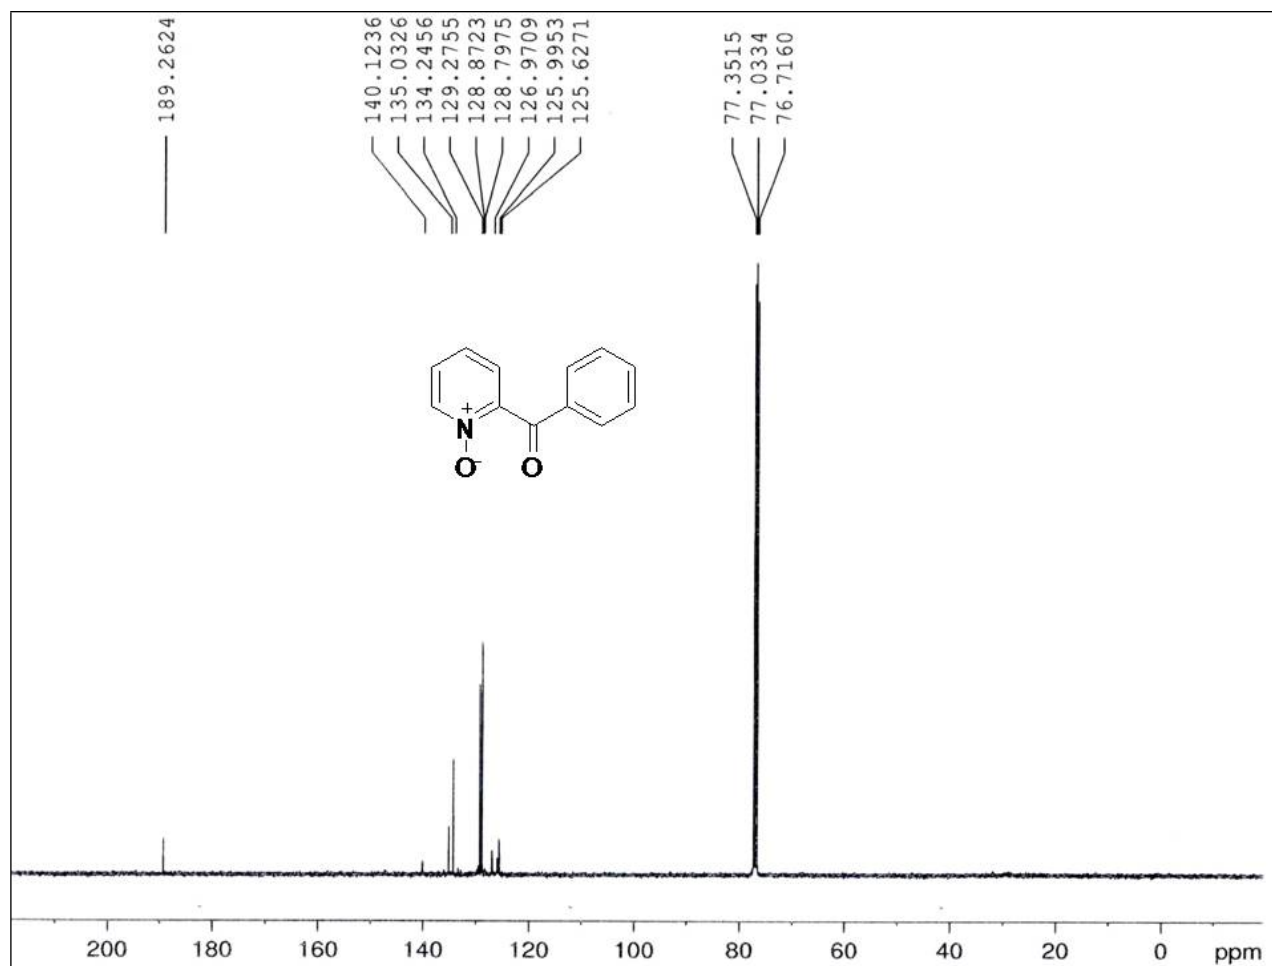

Fig 63.  $^{13}\text{C}$ -NMR spectrum of **3t**

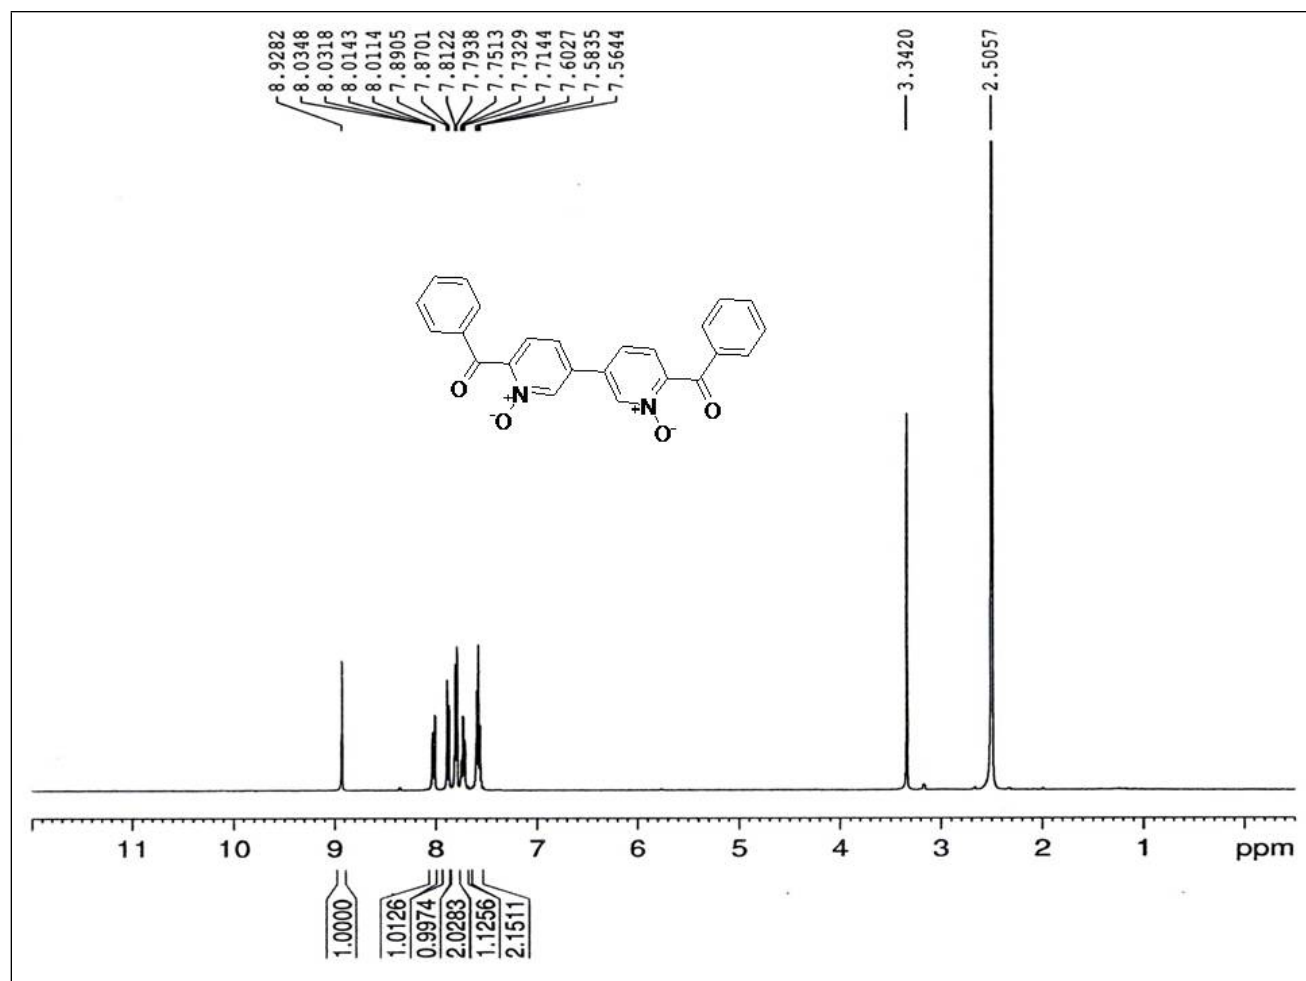

Fig 64. <sup>1</sup>H-NMR spectrum of **3t'**

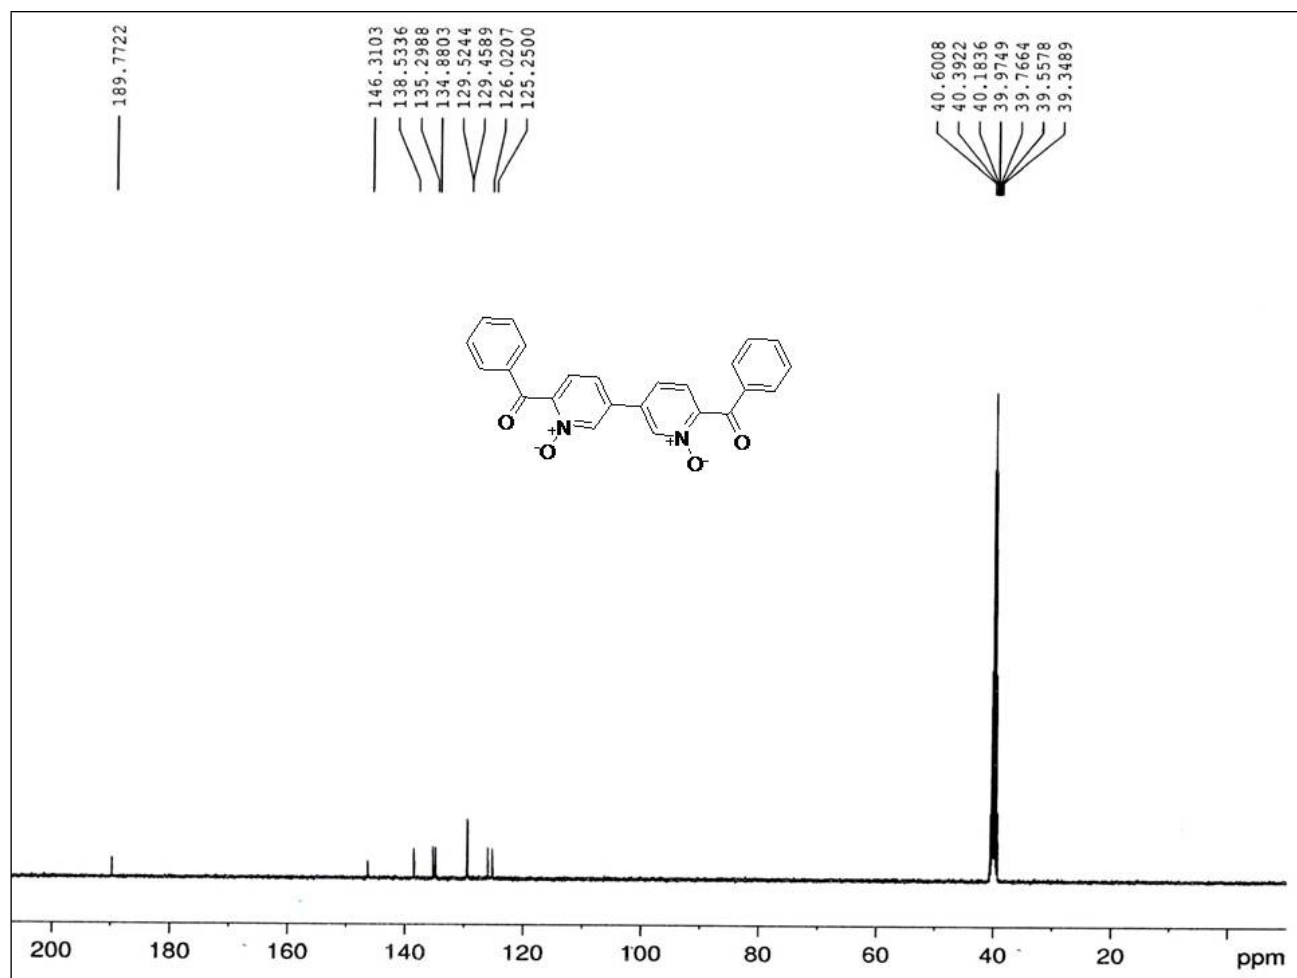

Fig 65. <sup>13</sup>C-NMR spectrum of **3t'**

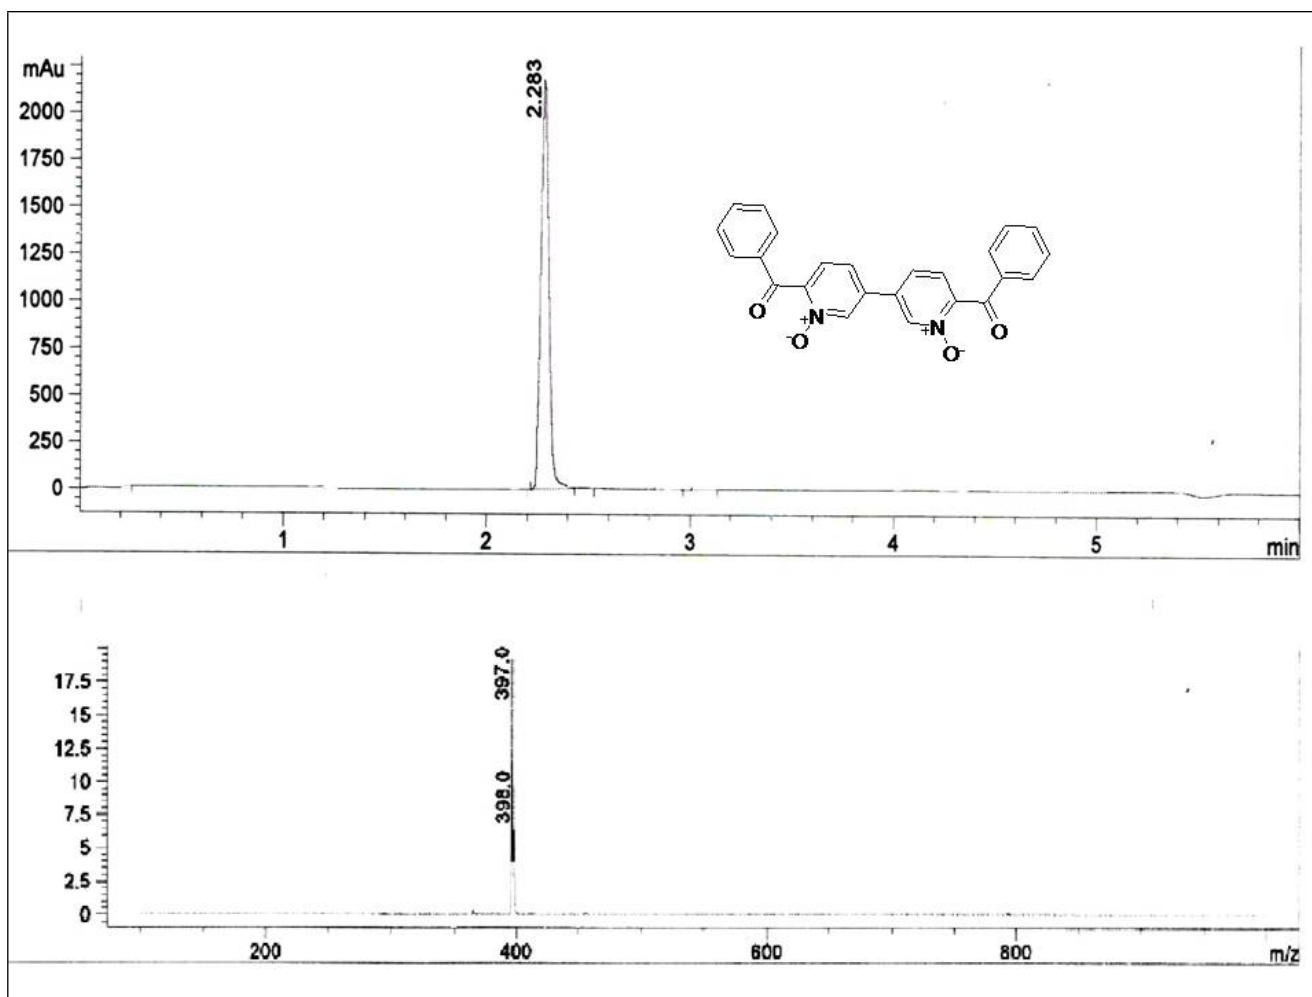

Fig 66. Mass spectrum of 3t'



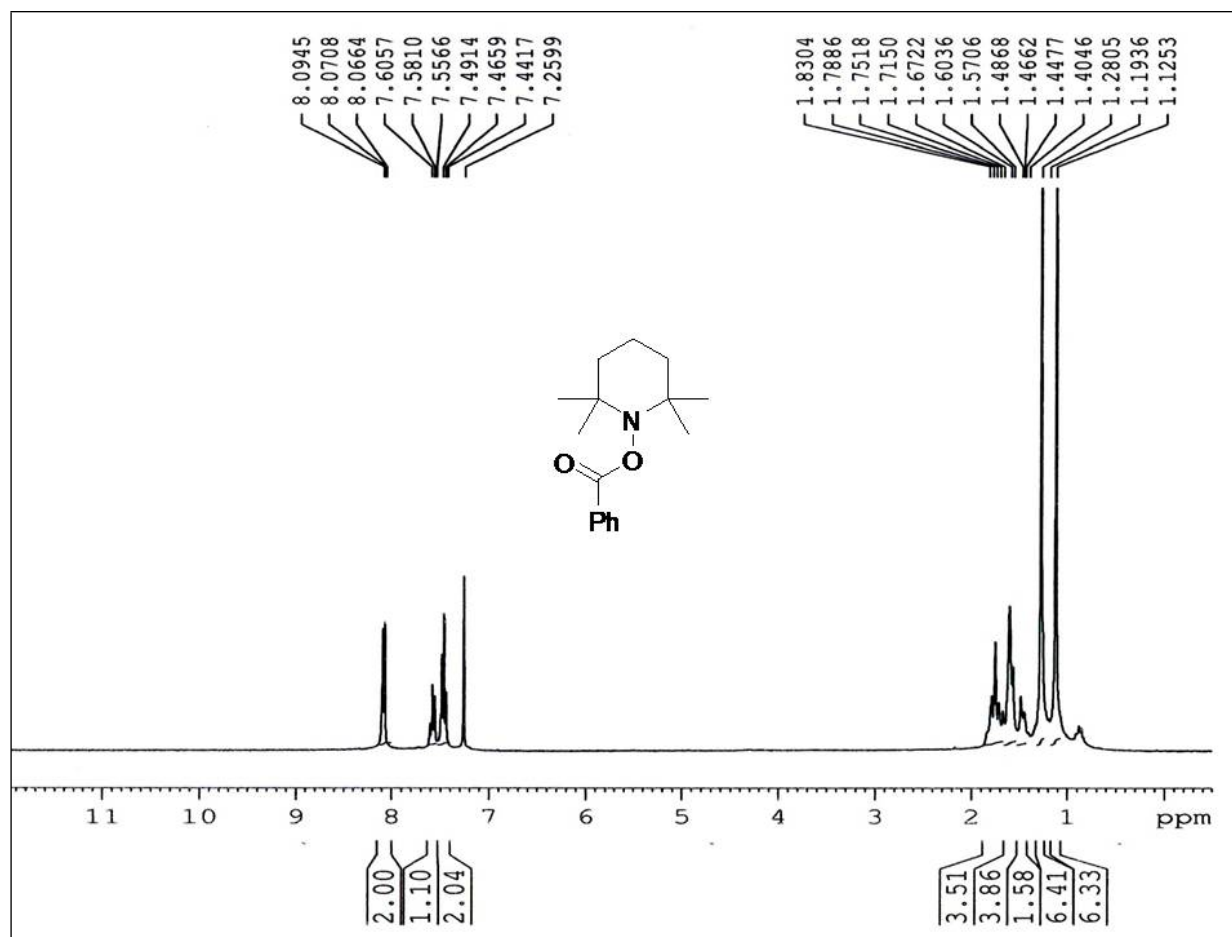

Fig 67. <sup>1</sup>H-NMR spectrum of 4

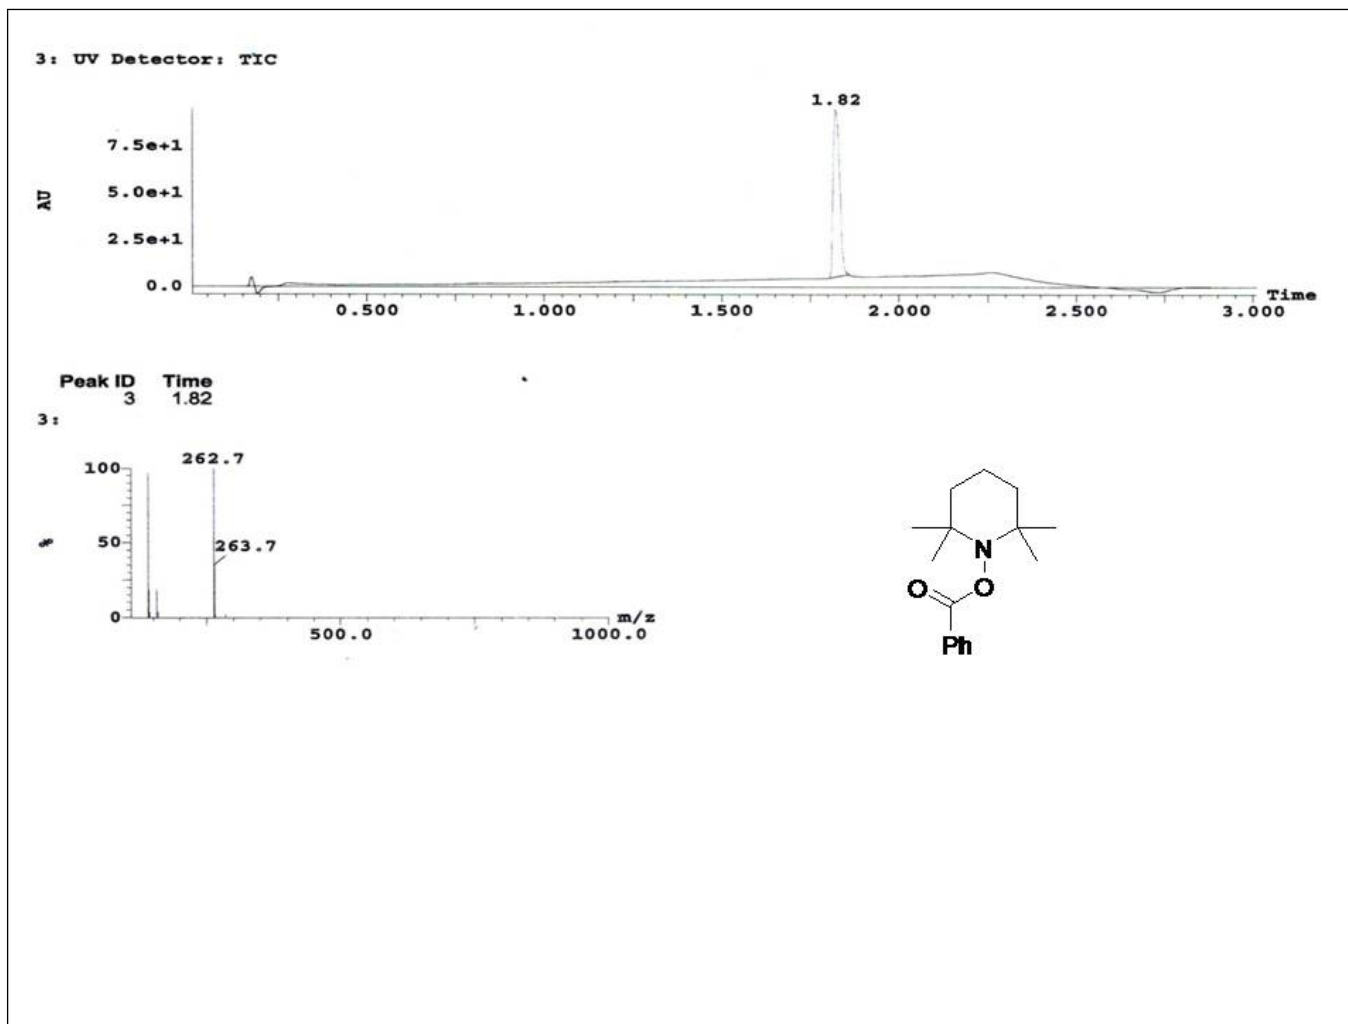

Fig 68. Mass spectrum of 4
